# Supplementary material for: Viability of elutriation for the extraction of microplastics from environmental soil samples
Source: Royal Society of Chemistry journal article supplement (doi:10.1039/d4va00087k), 2024-01-01
Supplement: d4va00087k1.pdf [file d4va00087k1.pdf]

Supplementary Information

Viability of Elutriation for the Extraction of Microplastics from Environmental Soil Samples

Kyle Forsythe,<sup>\*a</sup> Mason Egermeier,<sup>a</sup> Matthew Campen,<sup>b</sup> Marcus Garcia,<sup>b</sup> Rui Liu,<sup>b</sup> Matteo Minghetti,<sup>c</sup> Andrea Jilling,<sup>d</sup> Jorge Gonzalez-Estrella<sup>a</sup>

Department of Civil and Environmental Engineering, Oklahoma State University  
College of Pharmacy, University of New Mexico Albuquerque, NM 87131, USA  
Department of Integrative Biology, Oklahoma State University  
Department of Environmental Health Sciences, University of South Carolina

Table of Contents

**Supporting Tables**

**Table S1:** Soil sample sampling locations, soil textures, and organic matter contents.....S3  
**Table S2:** p-values for method comparisons. ....S3  
**Table S3:** ATR-FTIR spectra, Control, Sieving.....S4  
**Table S4:** ATR-FTIR spectra, Control, Elutriation.....S5  
**Table S5:** ATR-FTIR spectra, Arkansas River 2, Sieving.....S6  
**Table S6:** ATR-FTIR spectra, Arkansas River 2, Elutriation.....S7  
**Table S7:** ATR-FTIR spectra, Arkansas River 1, Sieving.....S8  
**Table S8:** ATR-FTIR spectra, Arkansas River 1, Elutriation.....S14  
**Table S9:** ATR-FTIR spectra, Boomer Creek, Sieving.....S20  
**Table S10:** ATR-FTIR spectra, Boomer Creek, Elutriation.....S26  
**Table S11:** ATR-FTIR spectra, Applied Biosolids 1, Sieving.....S32  
**Table S12:** ATR-FTIR spectra, Applied Biosolids 1, Elutriation.....S38  
**Table S13:** ATR-FTIR spectra, Applied Biosolids 2, Sieving.....S44  
**Table S14:** ATR-FTIR spectra, Applied Biosolids 2, Elutriation.....S50  
**Table S15:** FTIR-ATR matches for control (blank) samples.....S56  
**Table S16:** FTIR-ATR matches for Arkansas River 2 samples.....S56  
**Table S17:** FTIR-ATR matches for Arkansas River 1 samples.....S56  
**Table S18:** FTIR-ATR matches for Boomer Creek samples.....S57  
**Table S19:** FTIR-ATR matches for Applied Biosolids 1 samples.....S58  
**Table S20:** FTIR-ATR matches for Applied Biosolids 2 samples.....S59  
**Table S21:** Fluorescent images, Sieving.....S60  
**Table S22:** Fluorescent images, Elutriation.....S61

**Supporting Figures**

**Figure S1:** Si/C ratio for extracted samples vs % particle identification.....S63  
**Figure S2:** Mean Si/C ratio for extracted samples.....S63

## Supporting Tables

**Table S1:** Soil sample sampling locations, soil textures, and organic matter contents

| Sample              | Coordinates<br>(Latitude, Longitude) | Texture |        |        | Organic Matter   |
|---------------------|--------------------------------------|---------|--------|--------|------------------|
|                     |                                      | % Clay  | % Silt | % Sand | % Organic Matter |
| Arkansas River 2    | 35.9969810532°N, -95.9432463466°W    | 1.3     | 2.5    | 96.3   | 0.1              |
| Arkansas River 1    | 36.1042630780°N, -97.0421747433°W    | 8.8     | 6.3    | 85.0   | 2.4              |
| Boomer Creek        | 36.0911311334°N, -97.0197627590°W    | 16.3    | 28.8   | 55.0   | 5.1              |
| Applied Biosolids 1 | 36.1340376518°N, -95.9925524560°W    | 32.5    | 45.0   | 22.5   | 8.6              |
| Applied Biosolids 2 | 36.1340376518°N, -95.9925524560°W    | 50.0    | 33.3   | 16.7   | 6.0              |

**Table S2:** p-values for method comparisons. Green cells denote significant values ( $p < 0.05$ )

| Method Comparison                                                                       | AR2   | AR1   | BC    | AB1   | AB2   |
|-----------------------------------------------------------------------------------------|-------|-------|-------|-------|-------|
| Sieving+Digestion+Flotation<br>-<br>Elutriation+Digestion+Flotation<br>(Particle count) | 0.419 | 0.258 | 0.085 | 0.314 | 0.123 |
| Sieving+Digestion+Flotation<br>-<br>Elutriation+Digestion+Flotation<br>(concentration)  | 0.458 | 0.068 | 0.097 | 0.176 | 0.363 |
| Sieving<br>-<br>Elutriation<br>(concentration)                                          | 0.137 | 0.211 | 0.248 | 0.043 | 0.142 |
| Sieving<br>-<br>Sieving+Digestion+Flotation<br>(concentration)                          | 0.143 | 0.035 | 0.009 | 0.085 | 0.007 |
| Elutriation<br>-<br>Elutriation+Digestion+Flotation<br>(concentration)                  | 0.199 | 0.019 | 0.005 | 0.001 | 0.078 |

**Table S3: ATR-FTIR spectra, Control, Sieving**

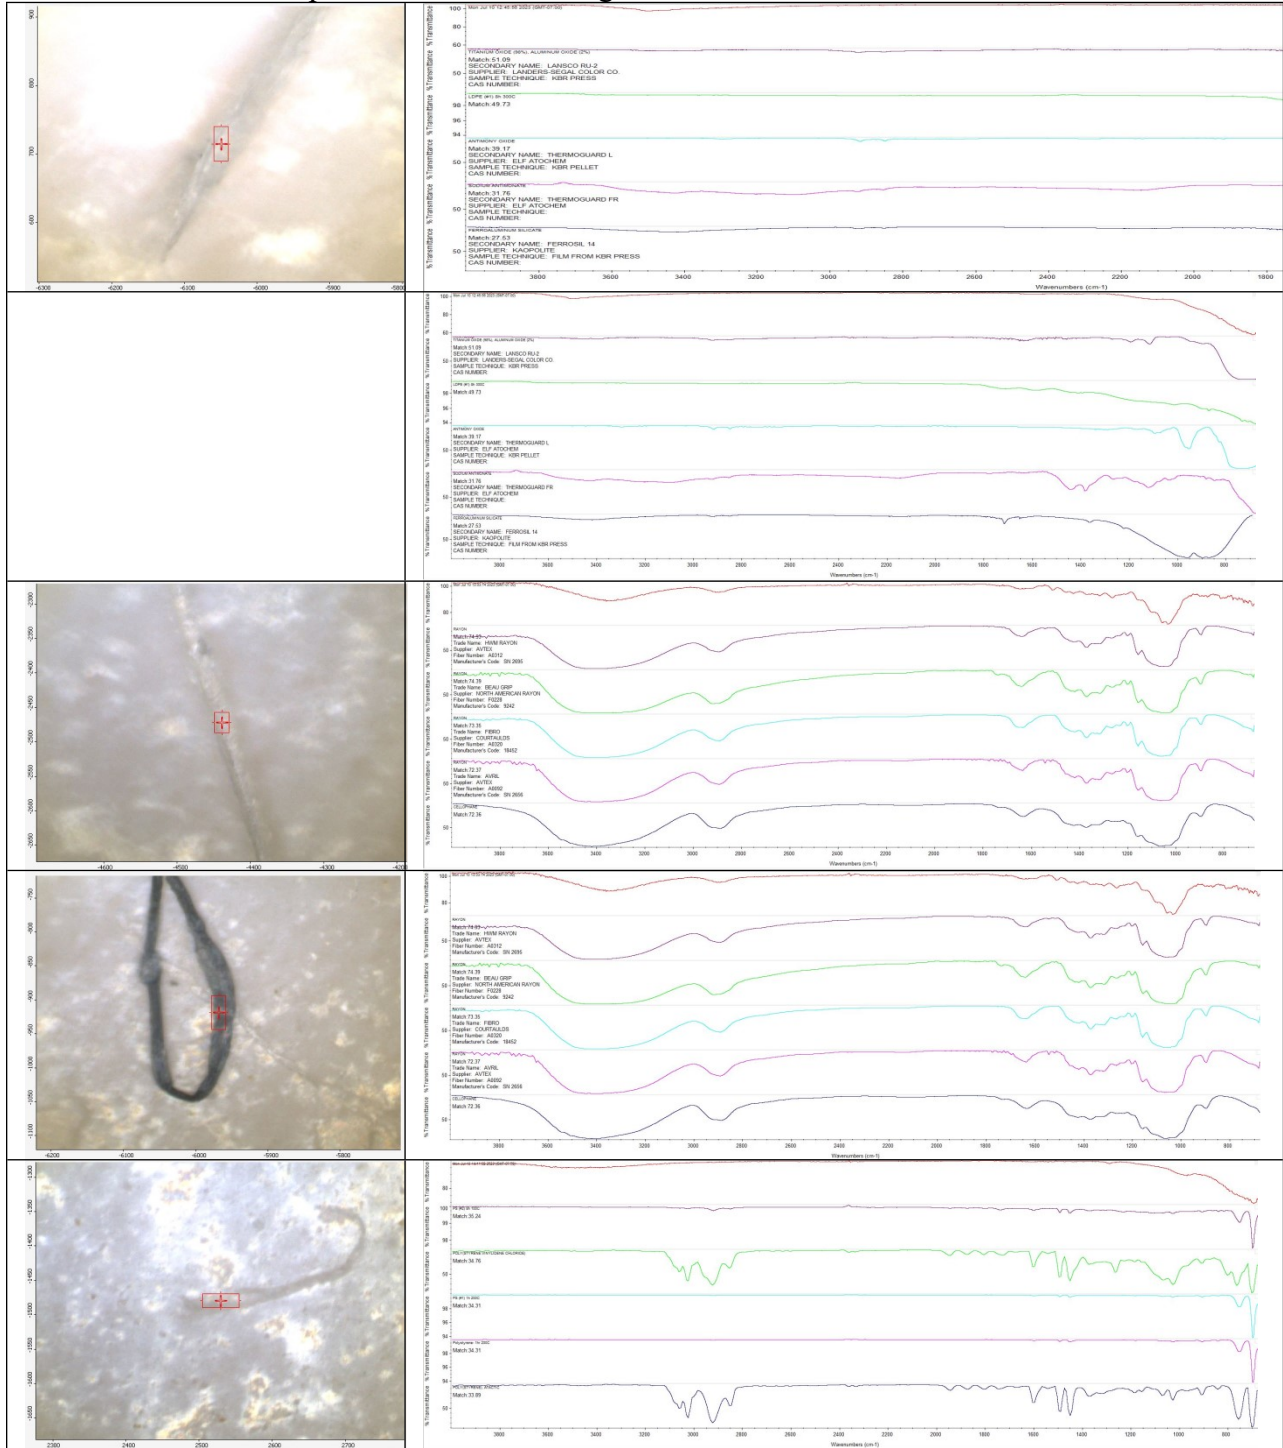

**Table S4: ATR-FTIR spectra, Control, Elutriation**

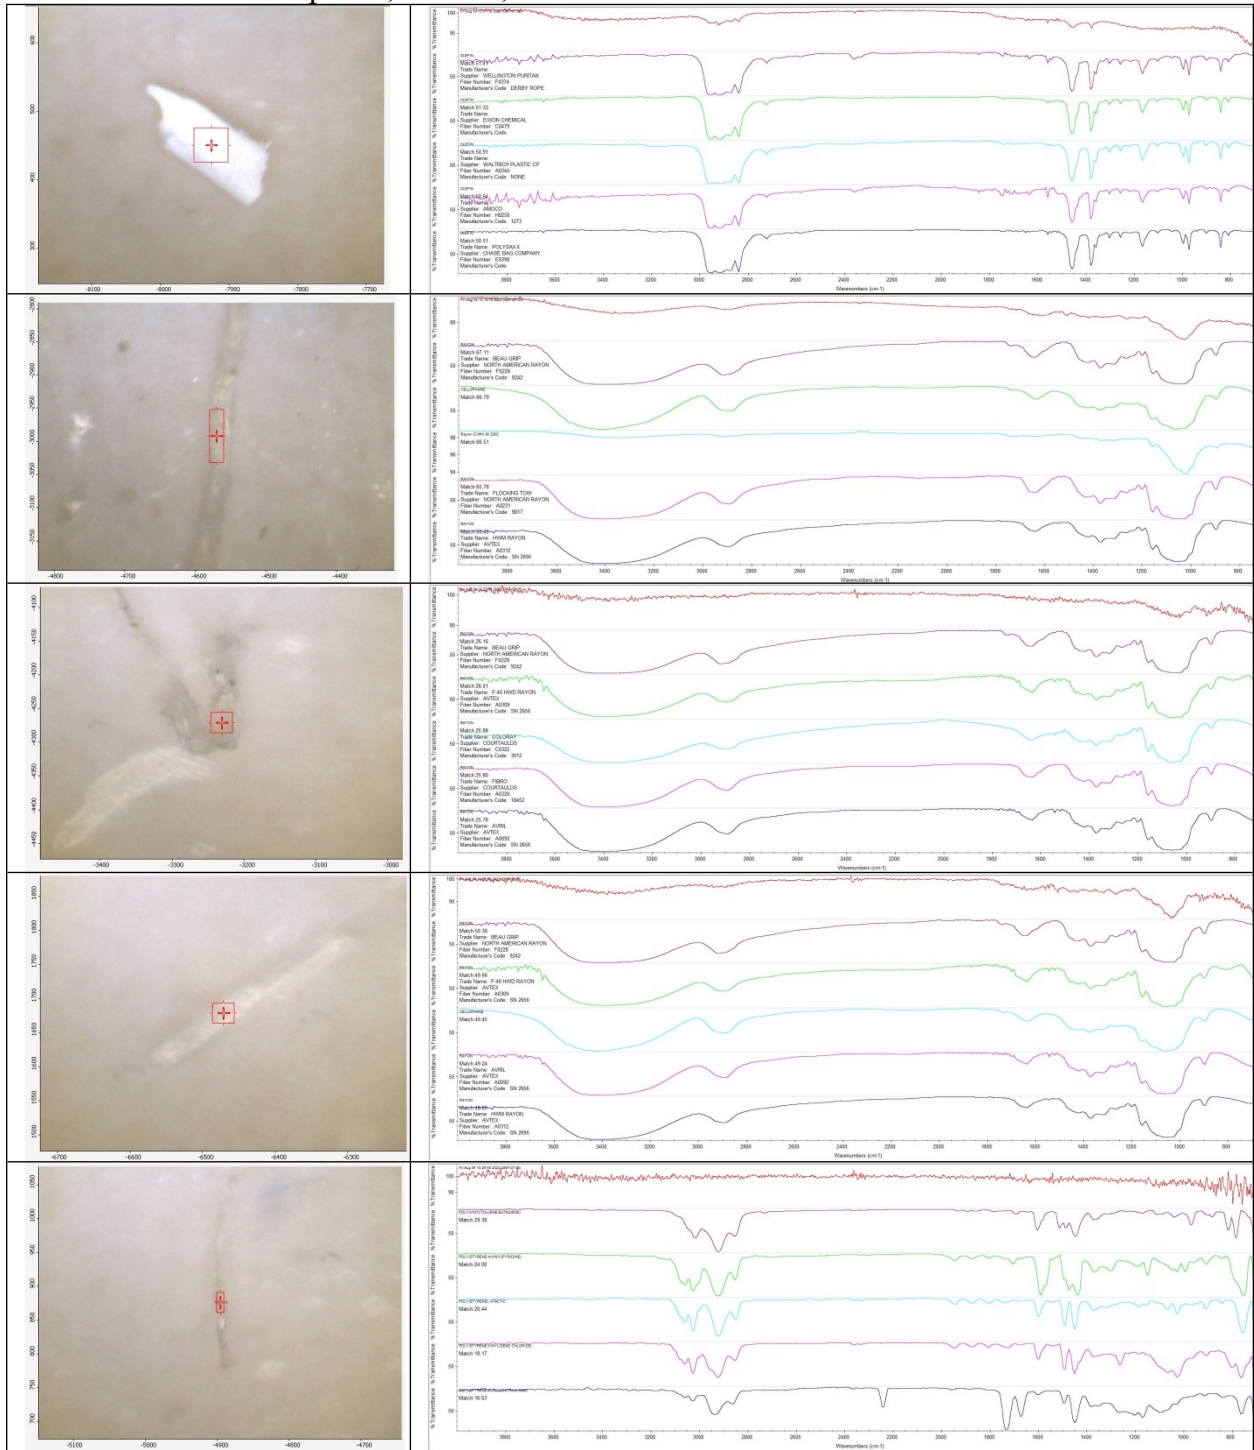

**Table S5: ATR-FTIR spectra, Arkansas River 2, Sieving**

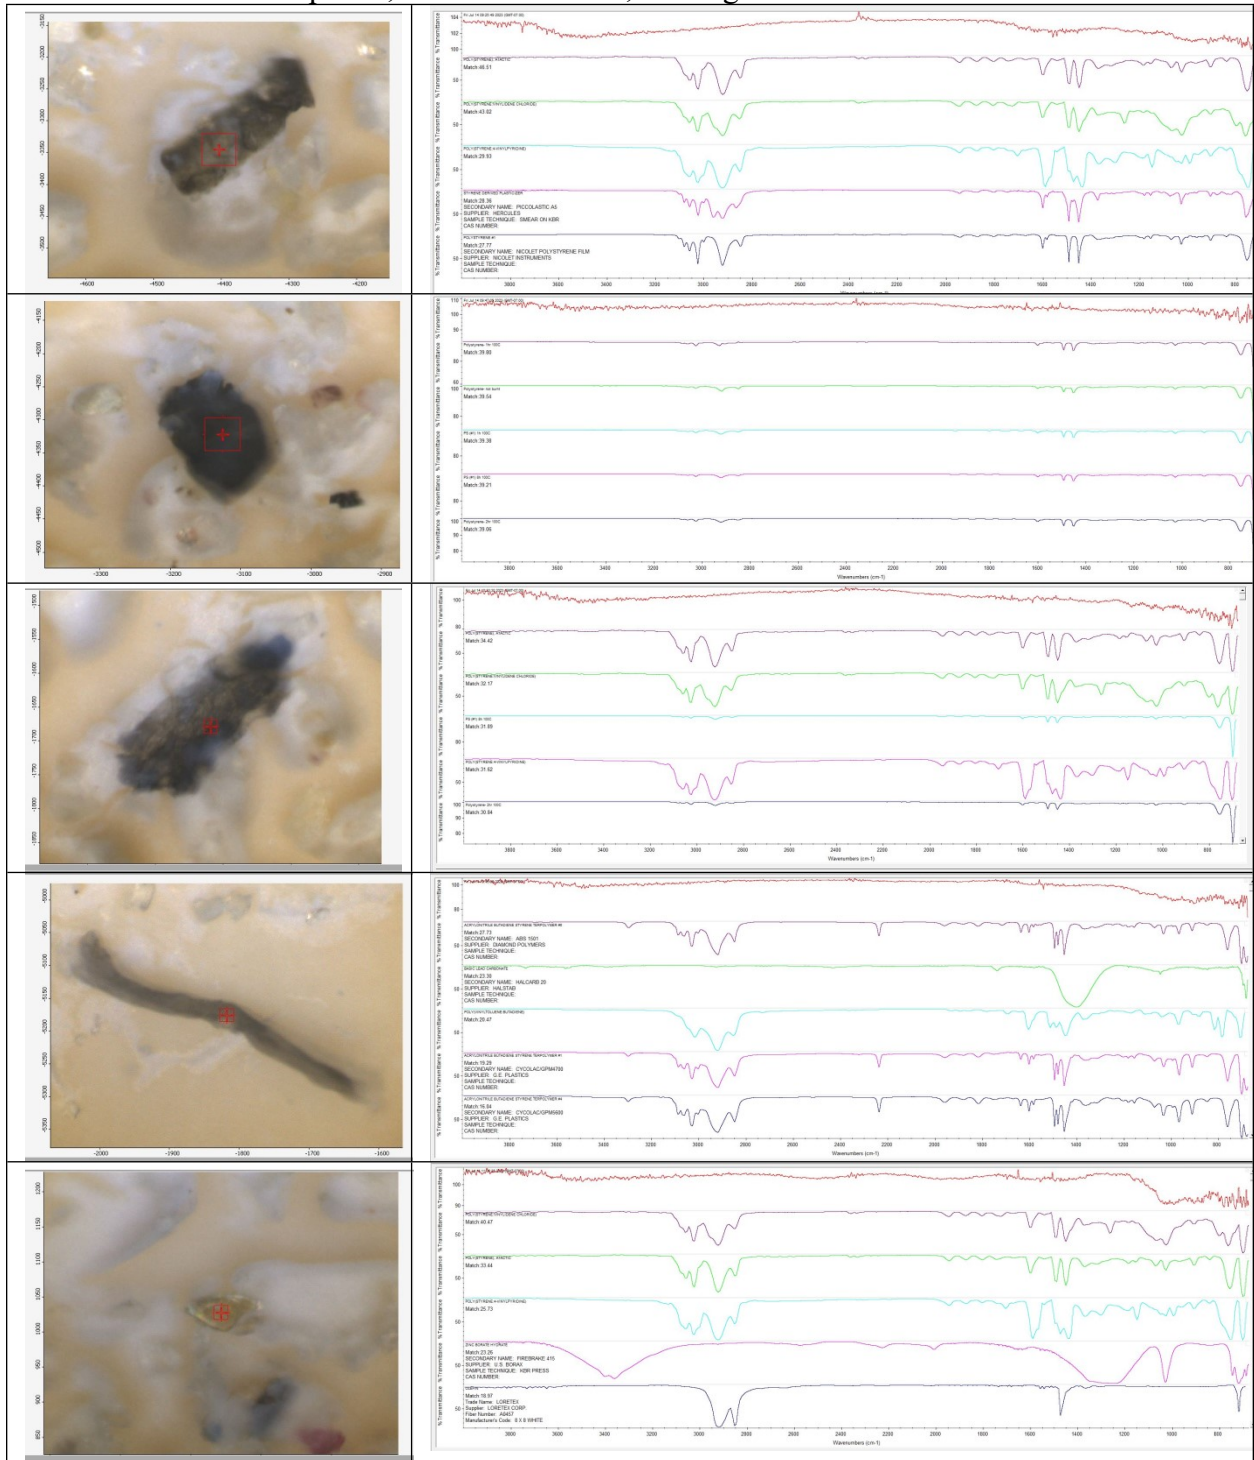

**Table S6: ATR-FTIR spectra, Arkansas River 2, Elutriation**

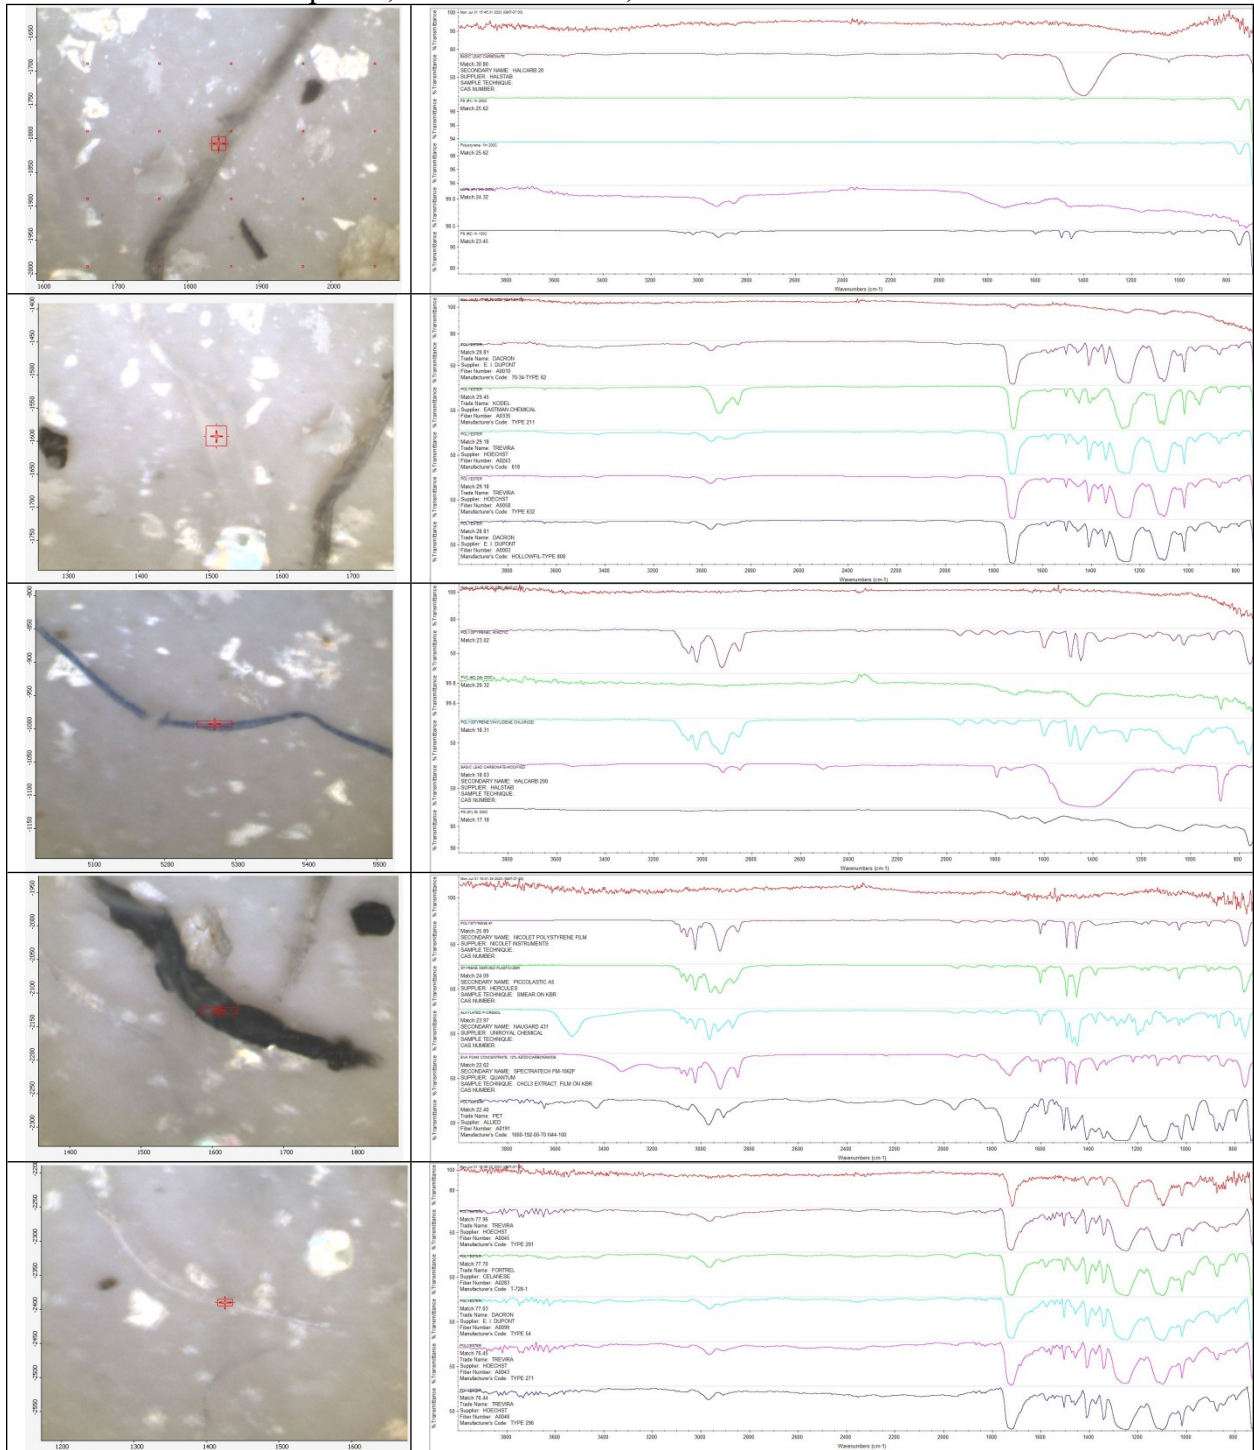

**Table S7: ATR-FTIR spectra, Arkansas River 1, Sieving**

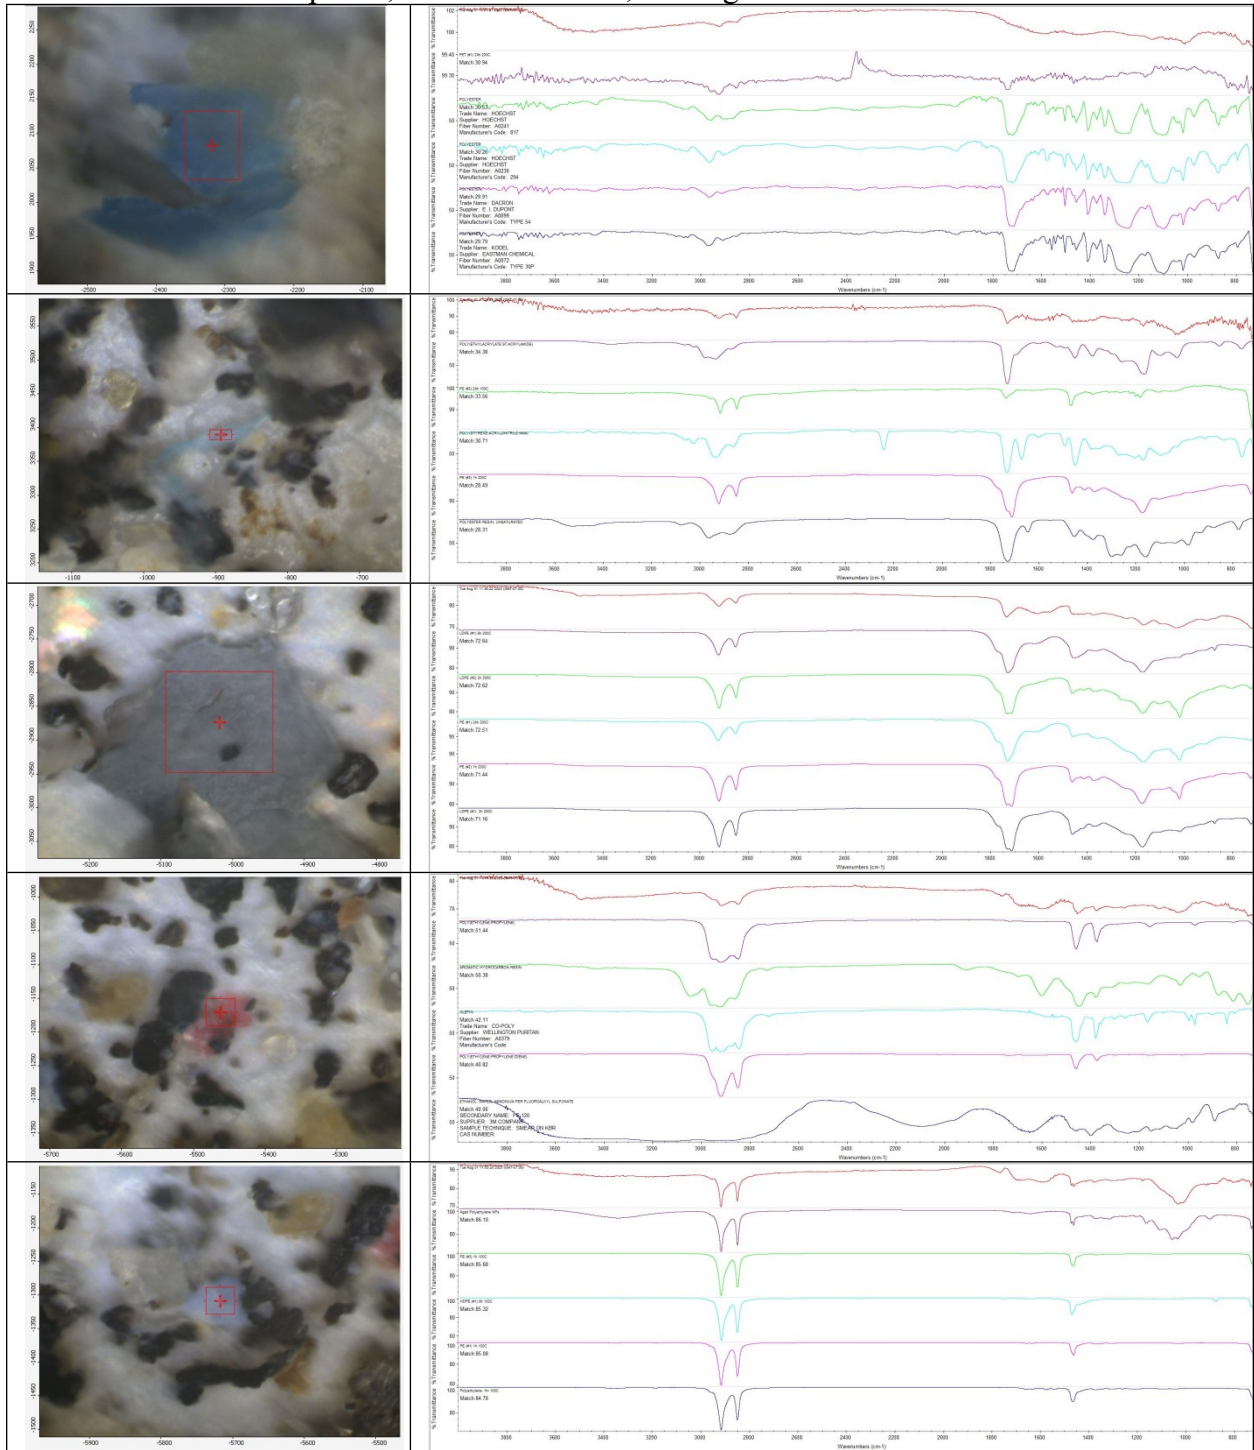



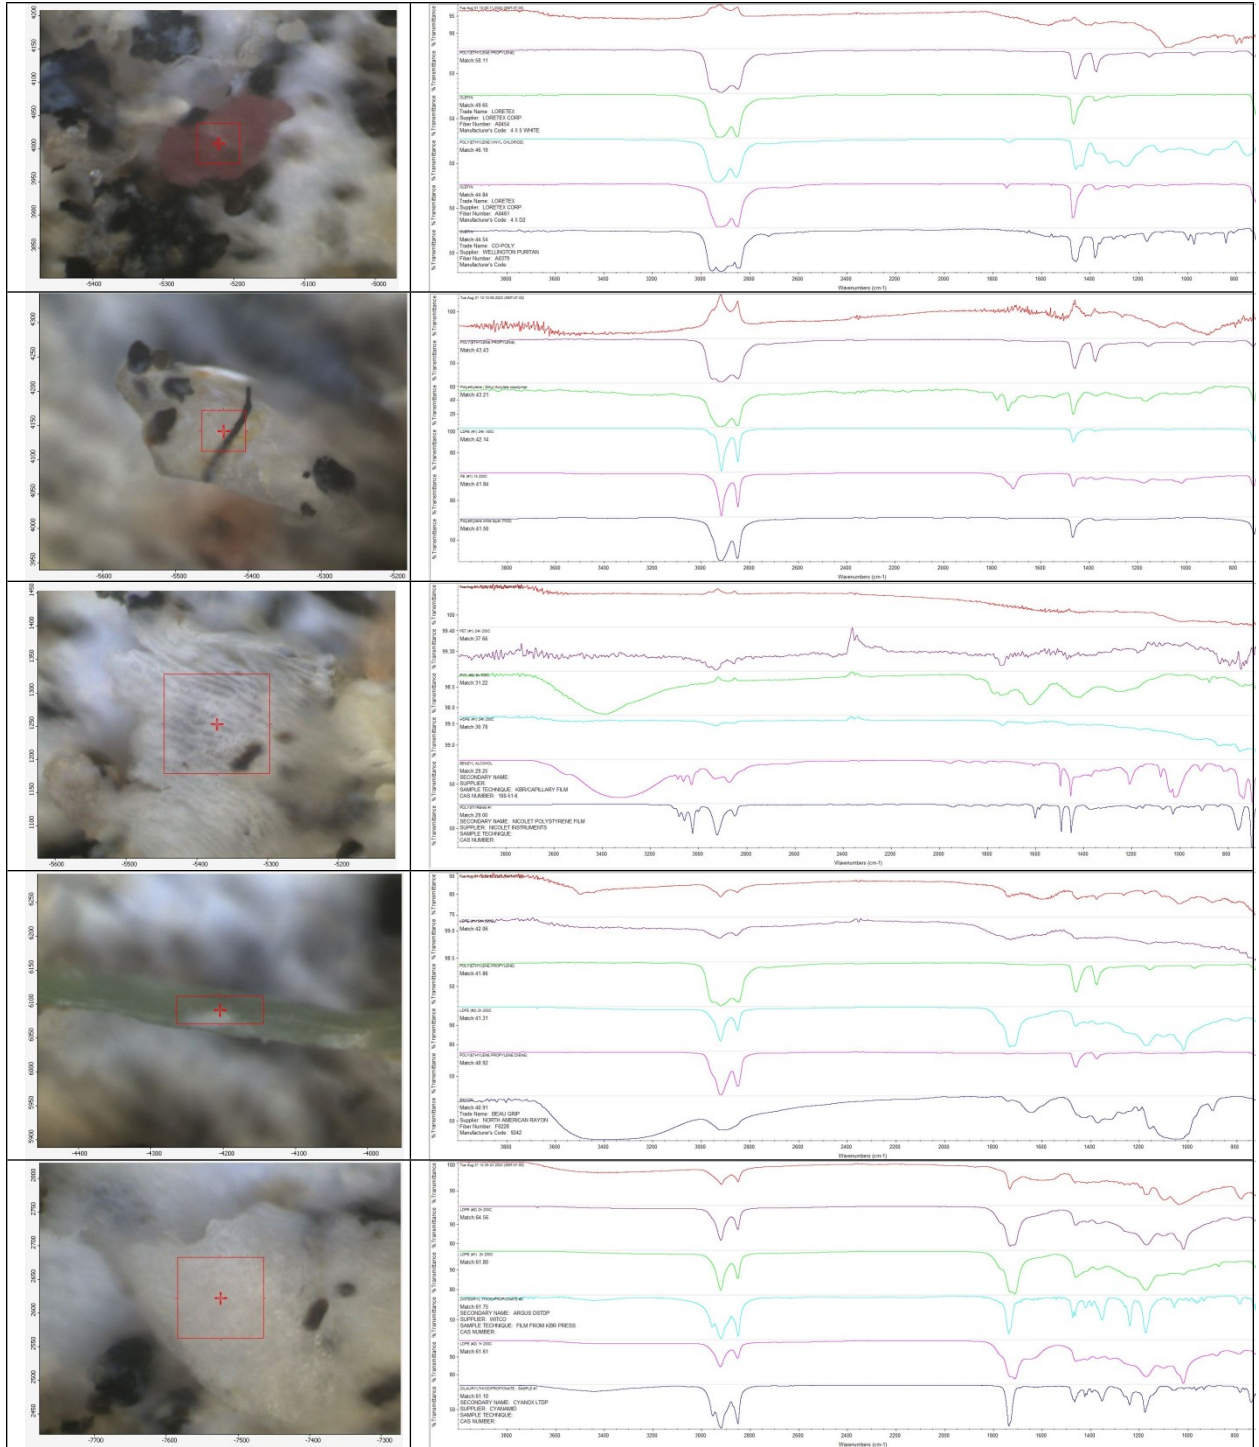

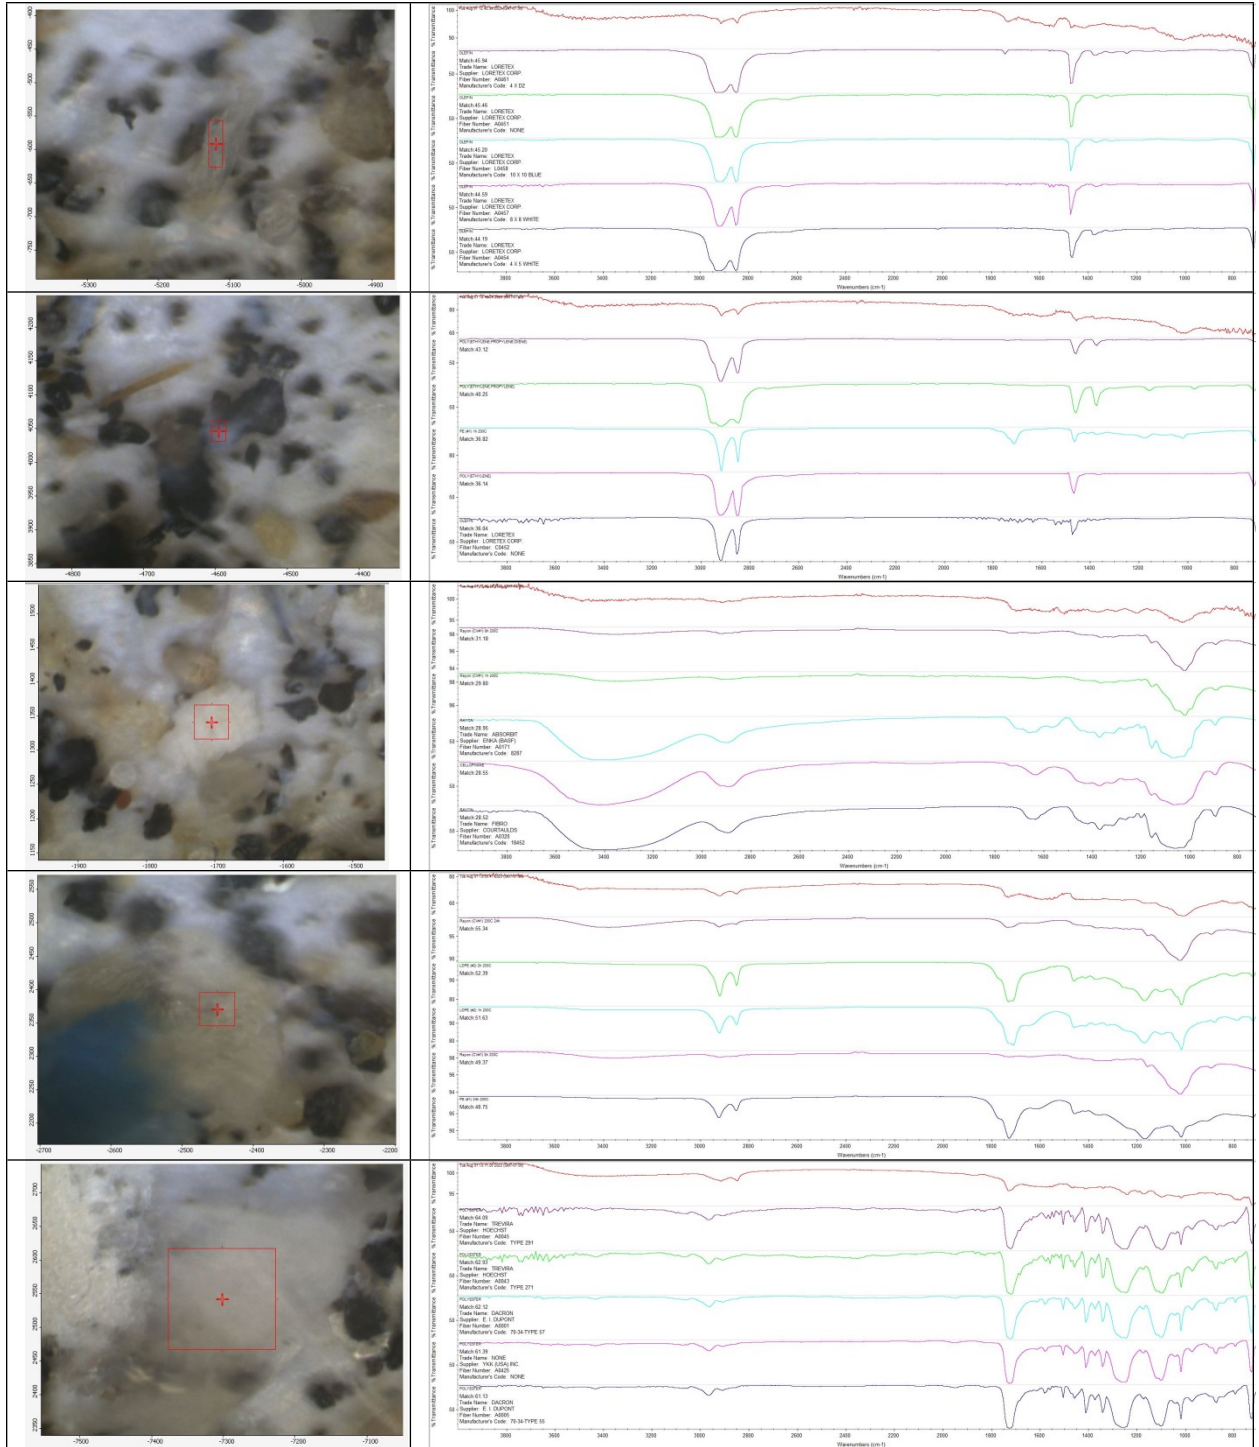

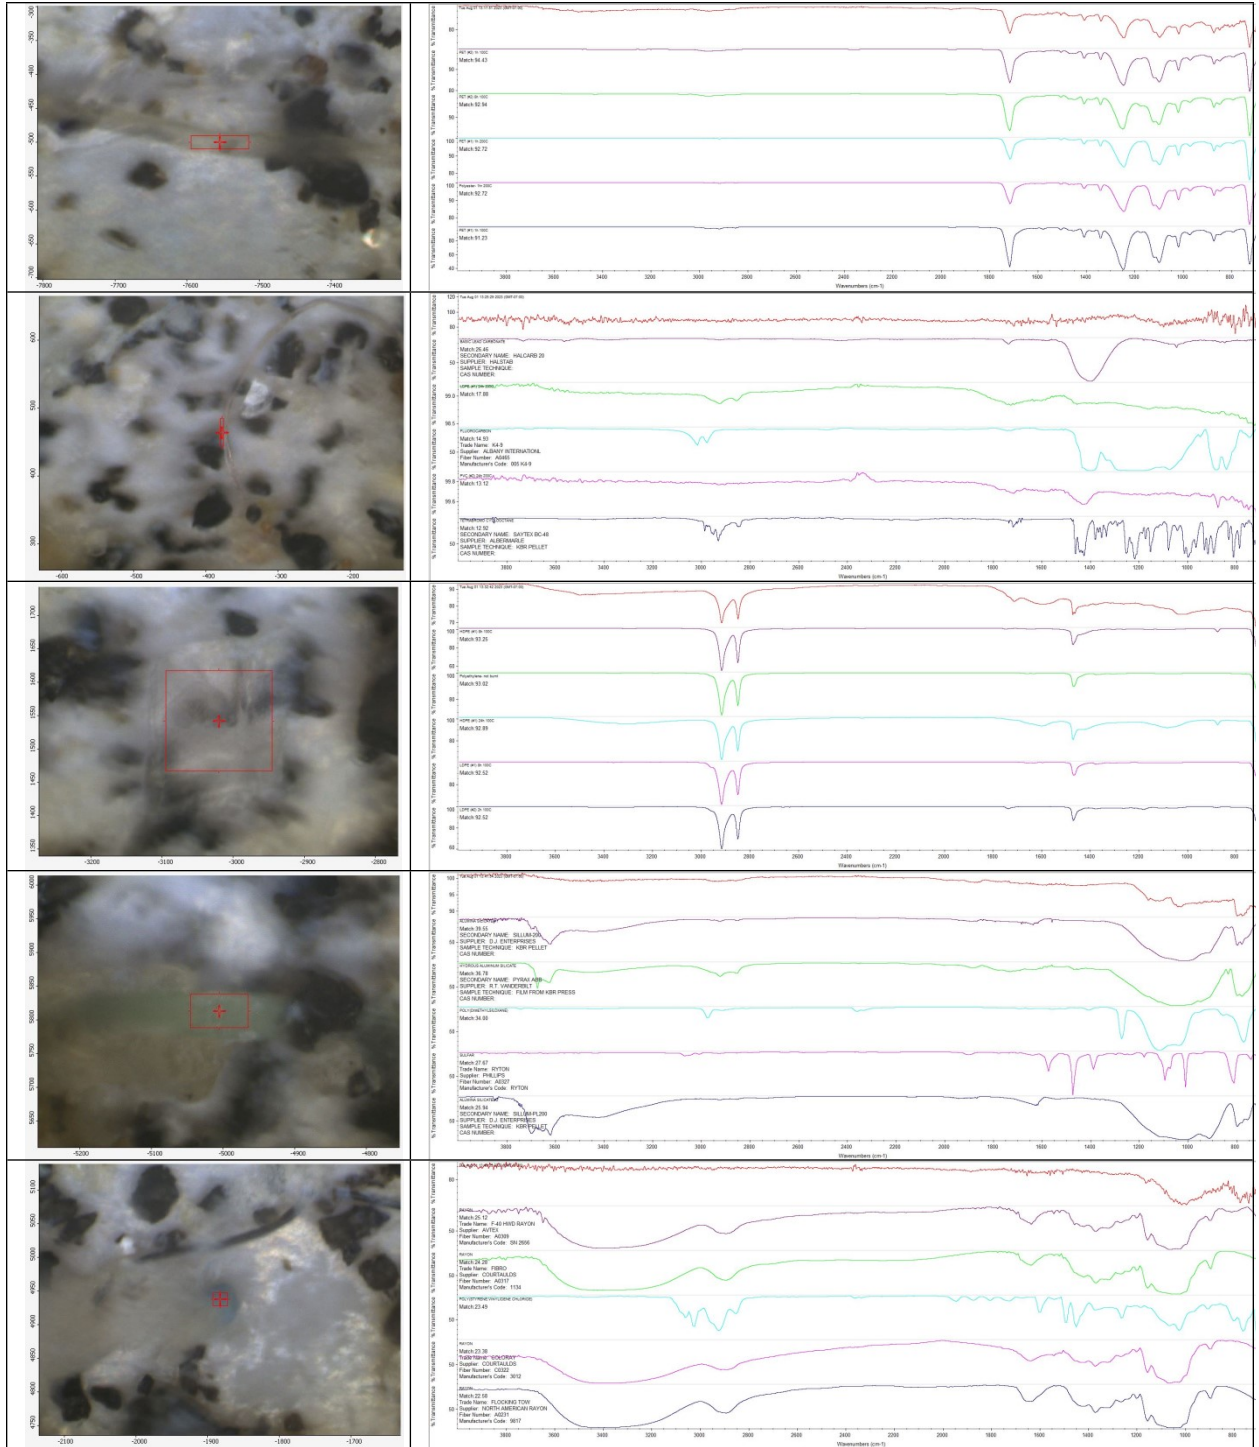

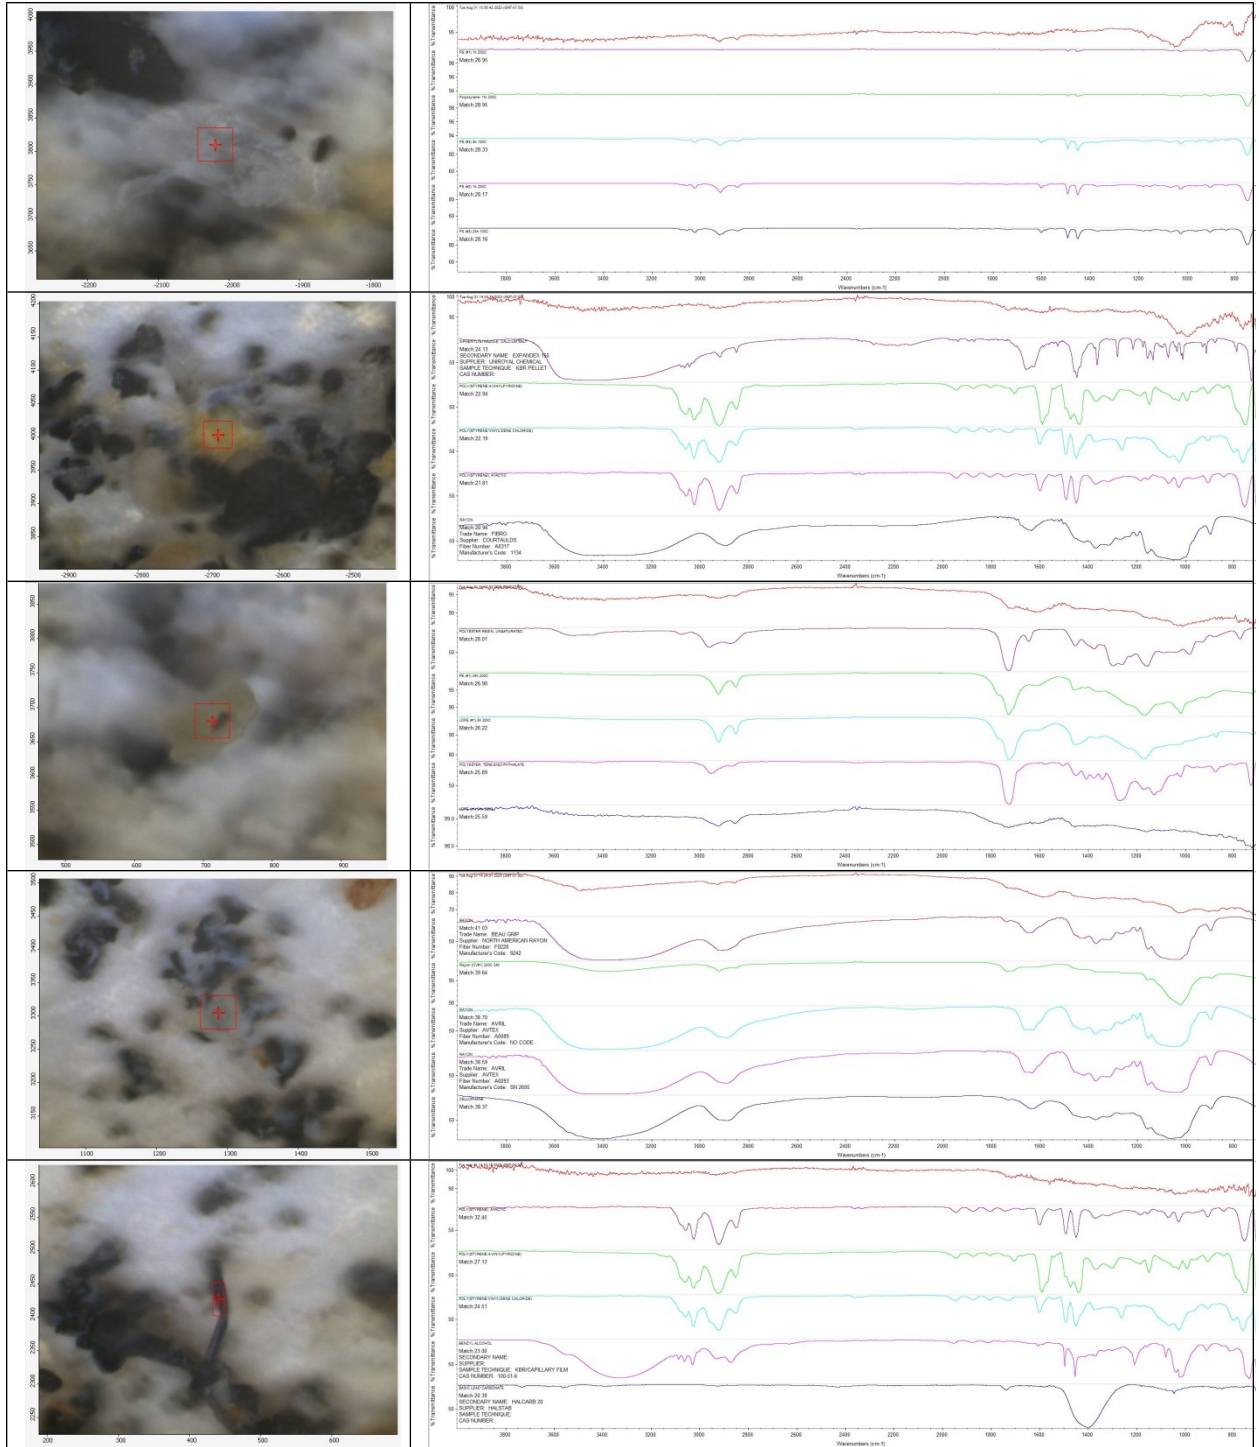

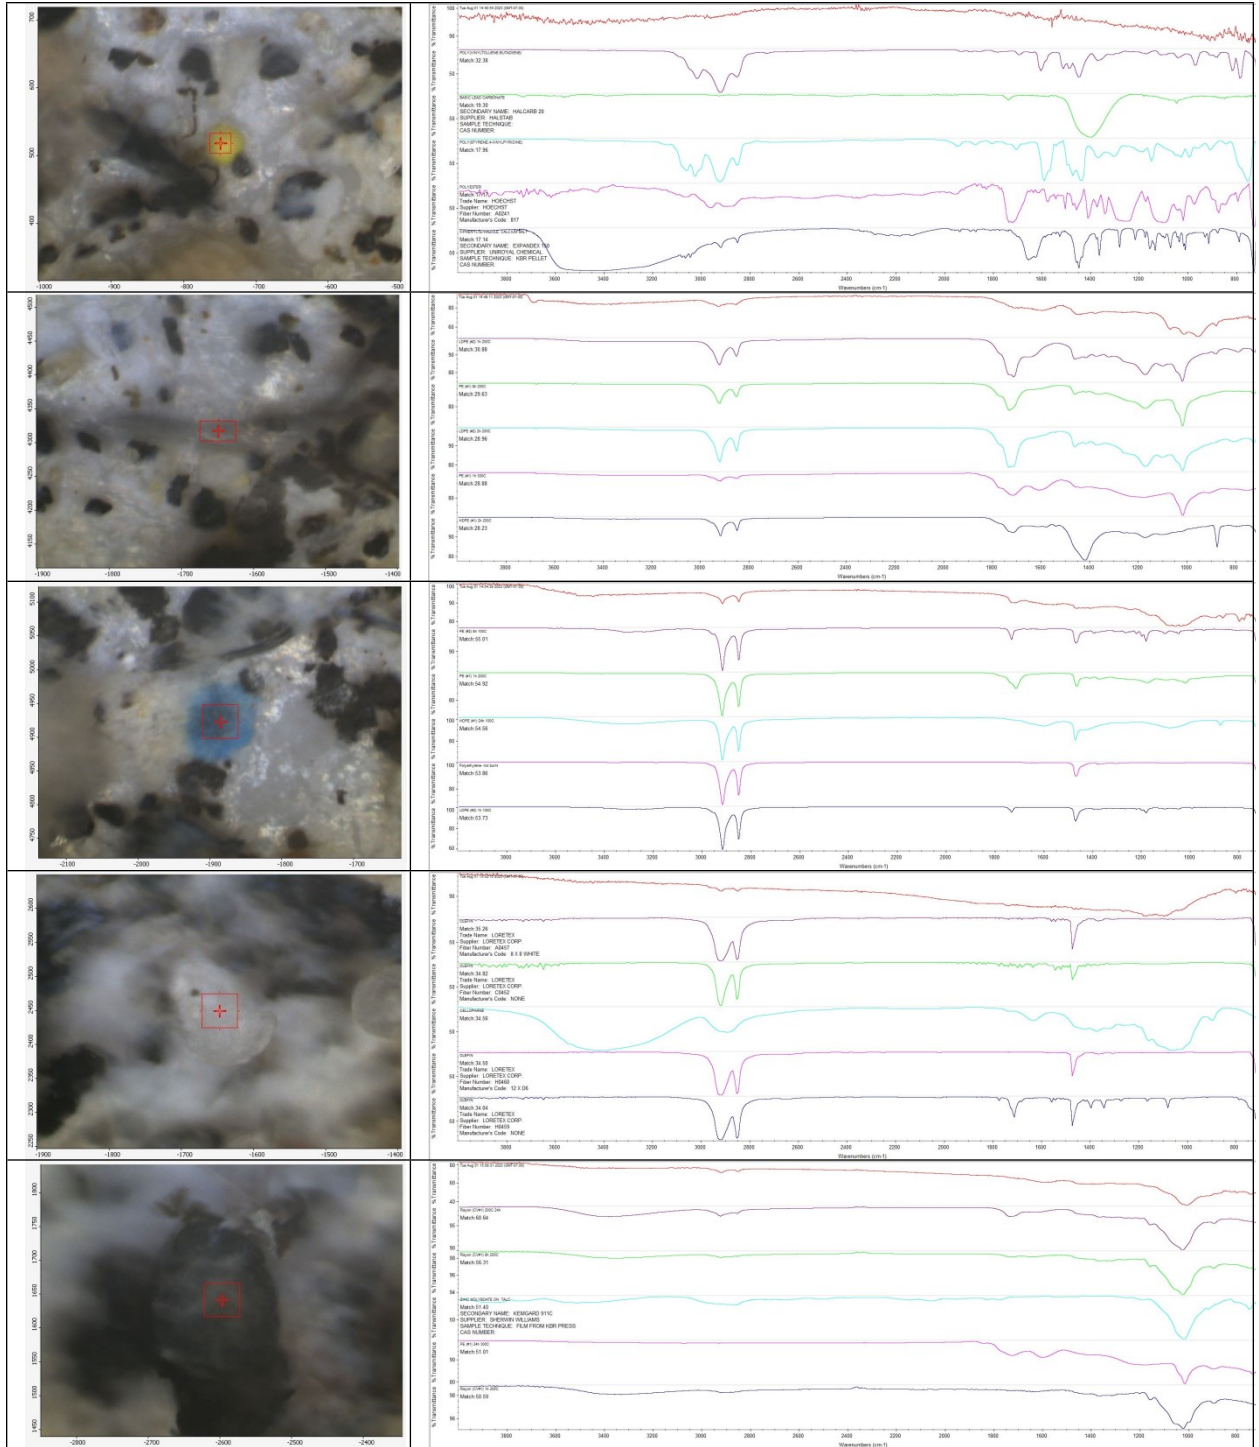

**Table S8: ATR-FTIR spectra, Arkansas River 1, Elutriation**

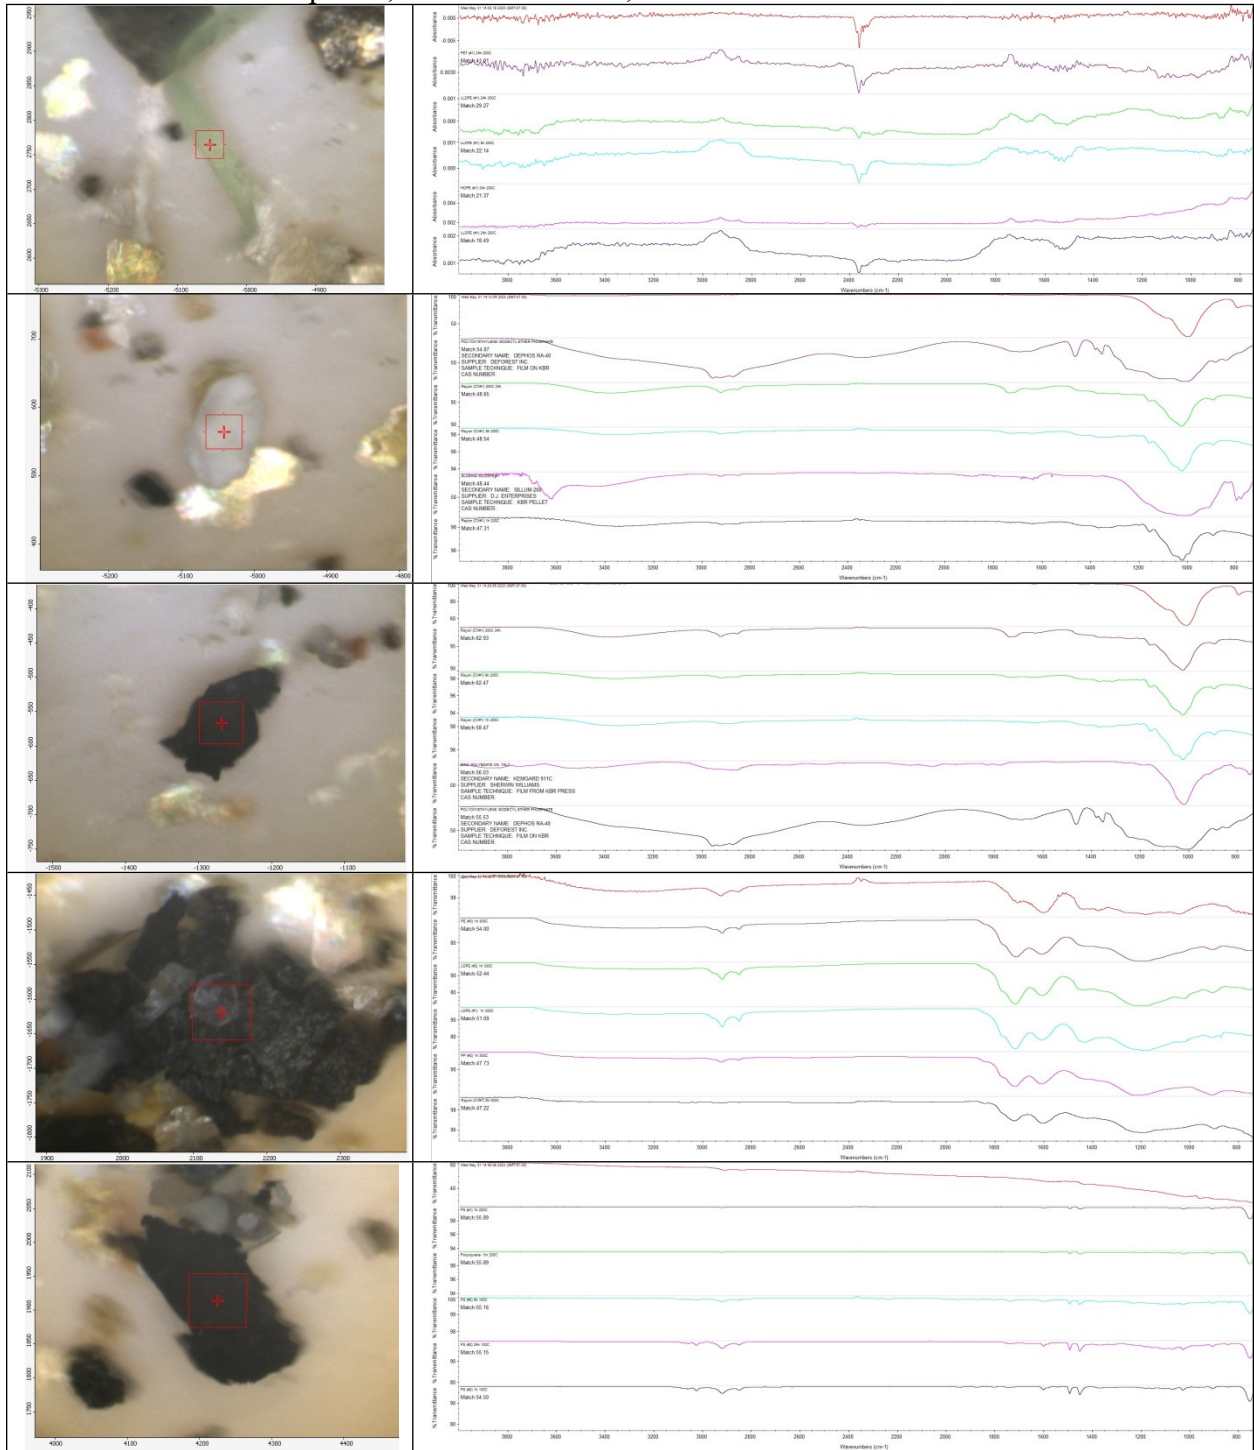

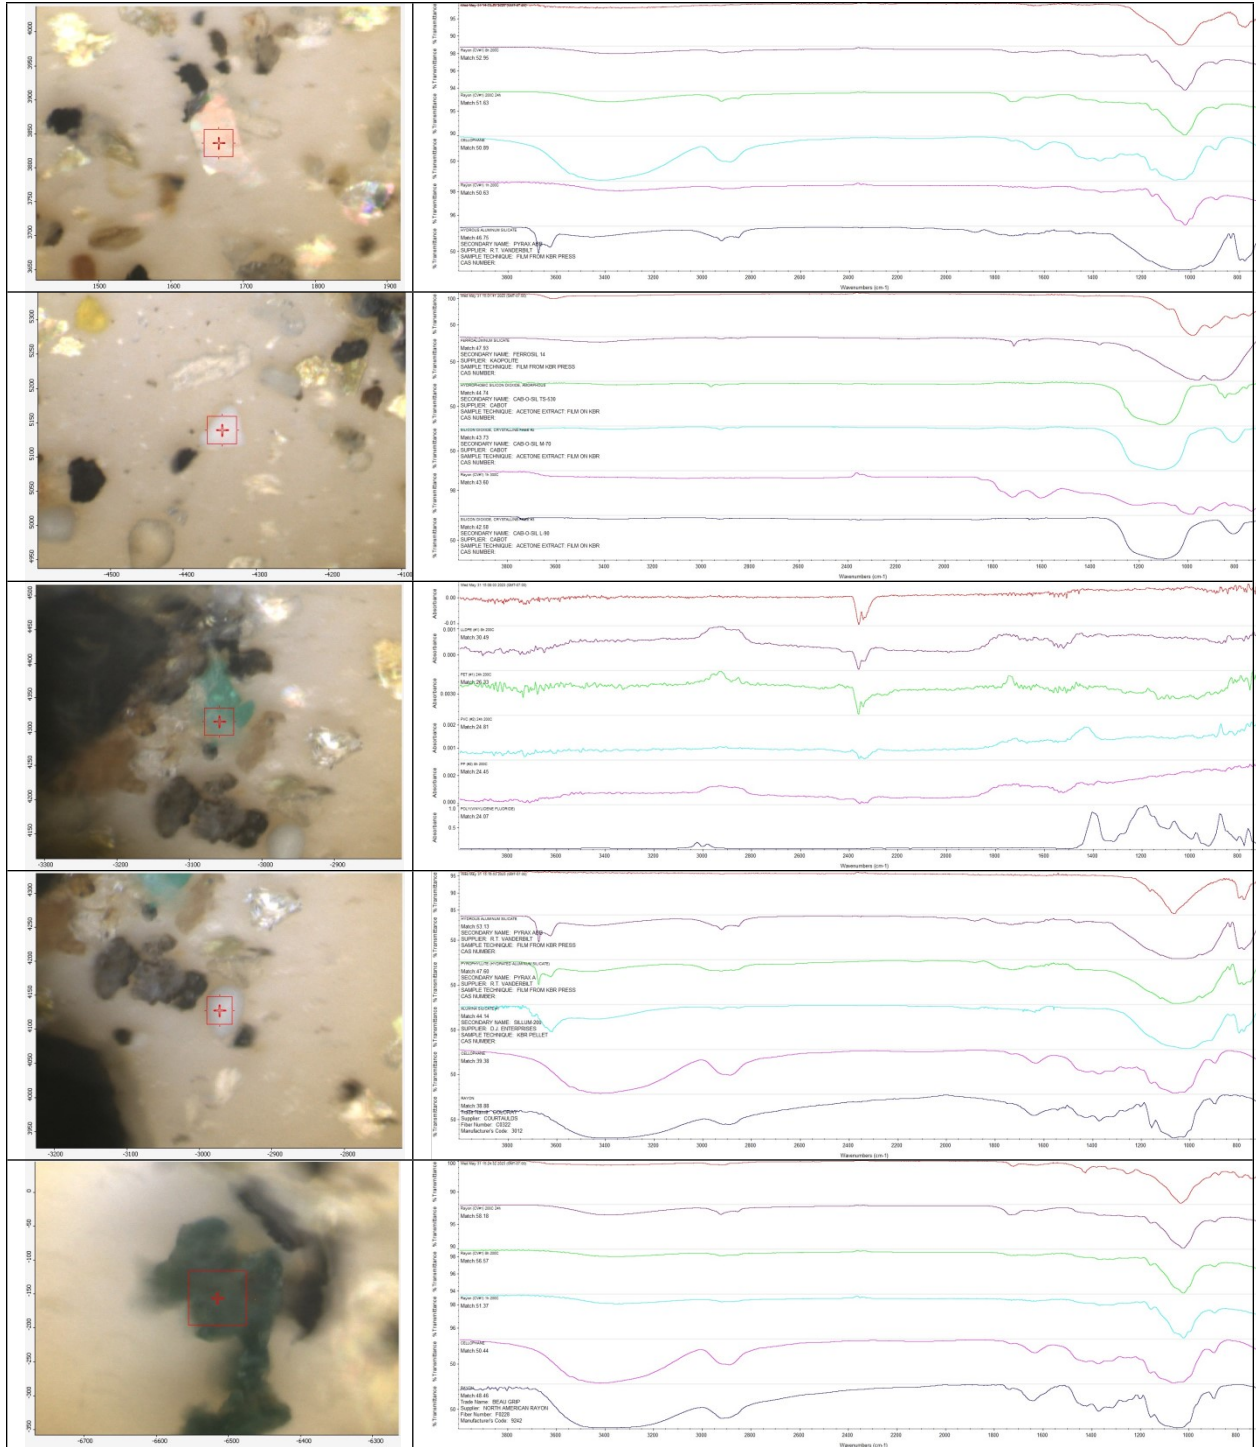





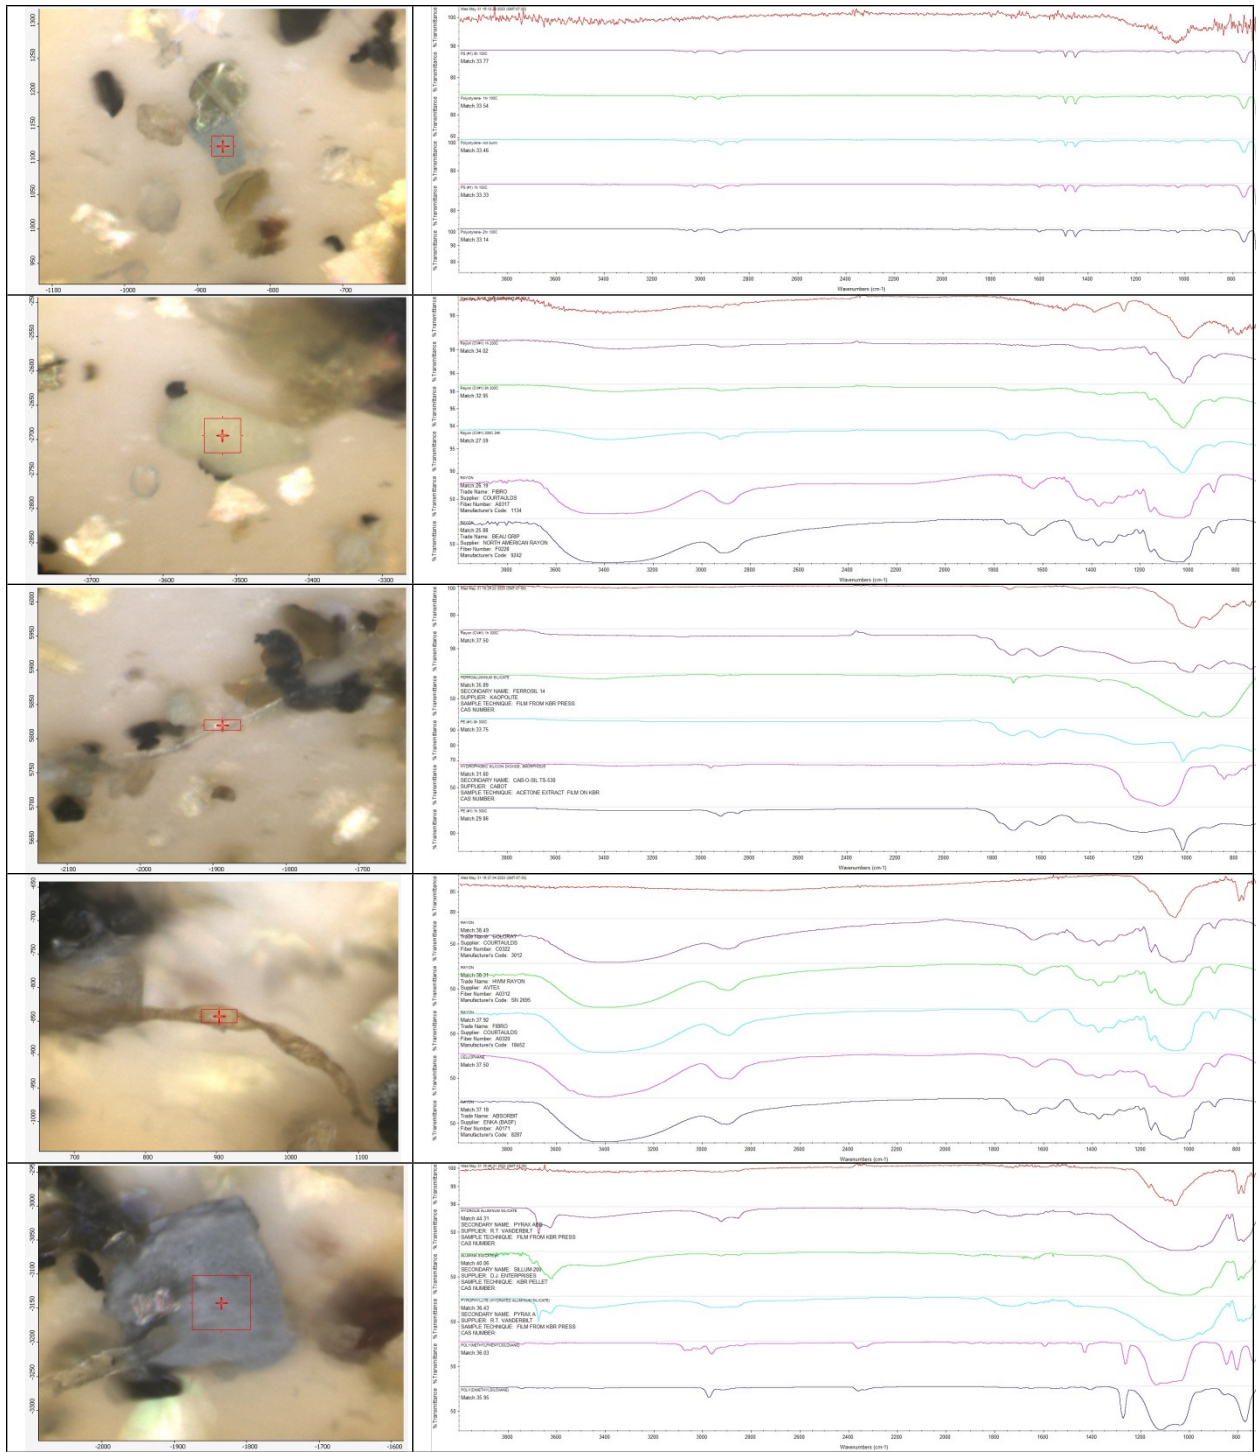

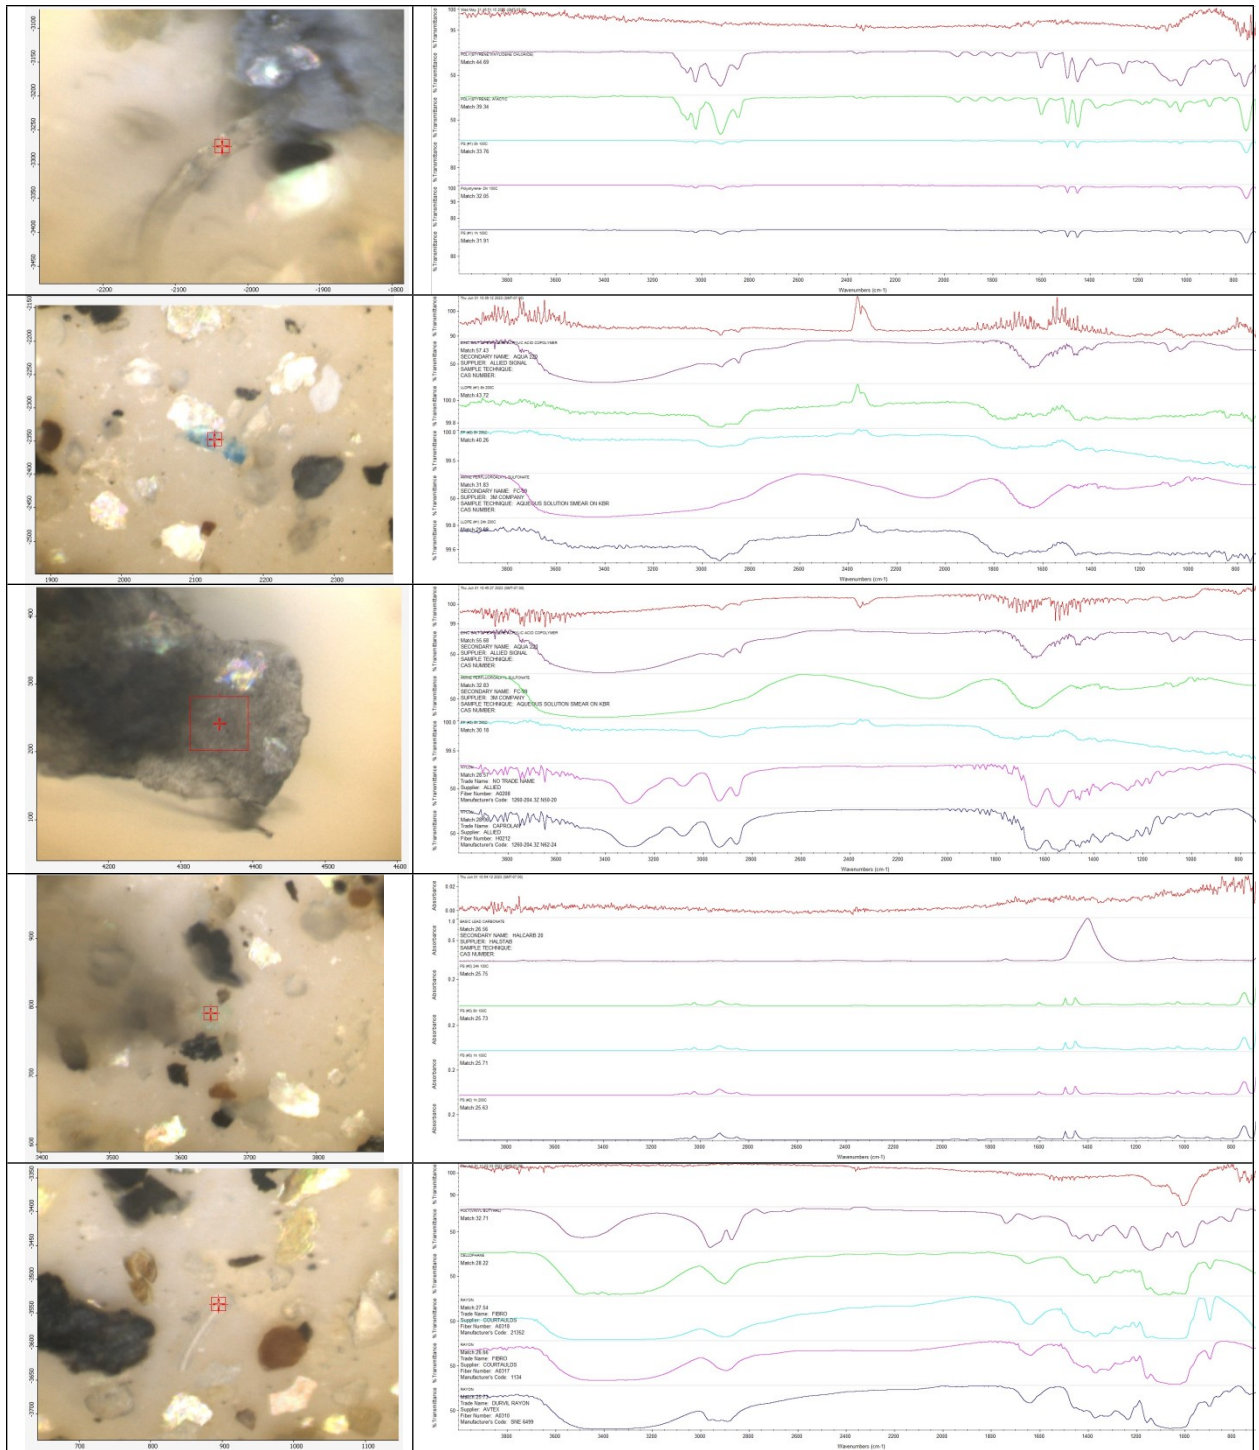

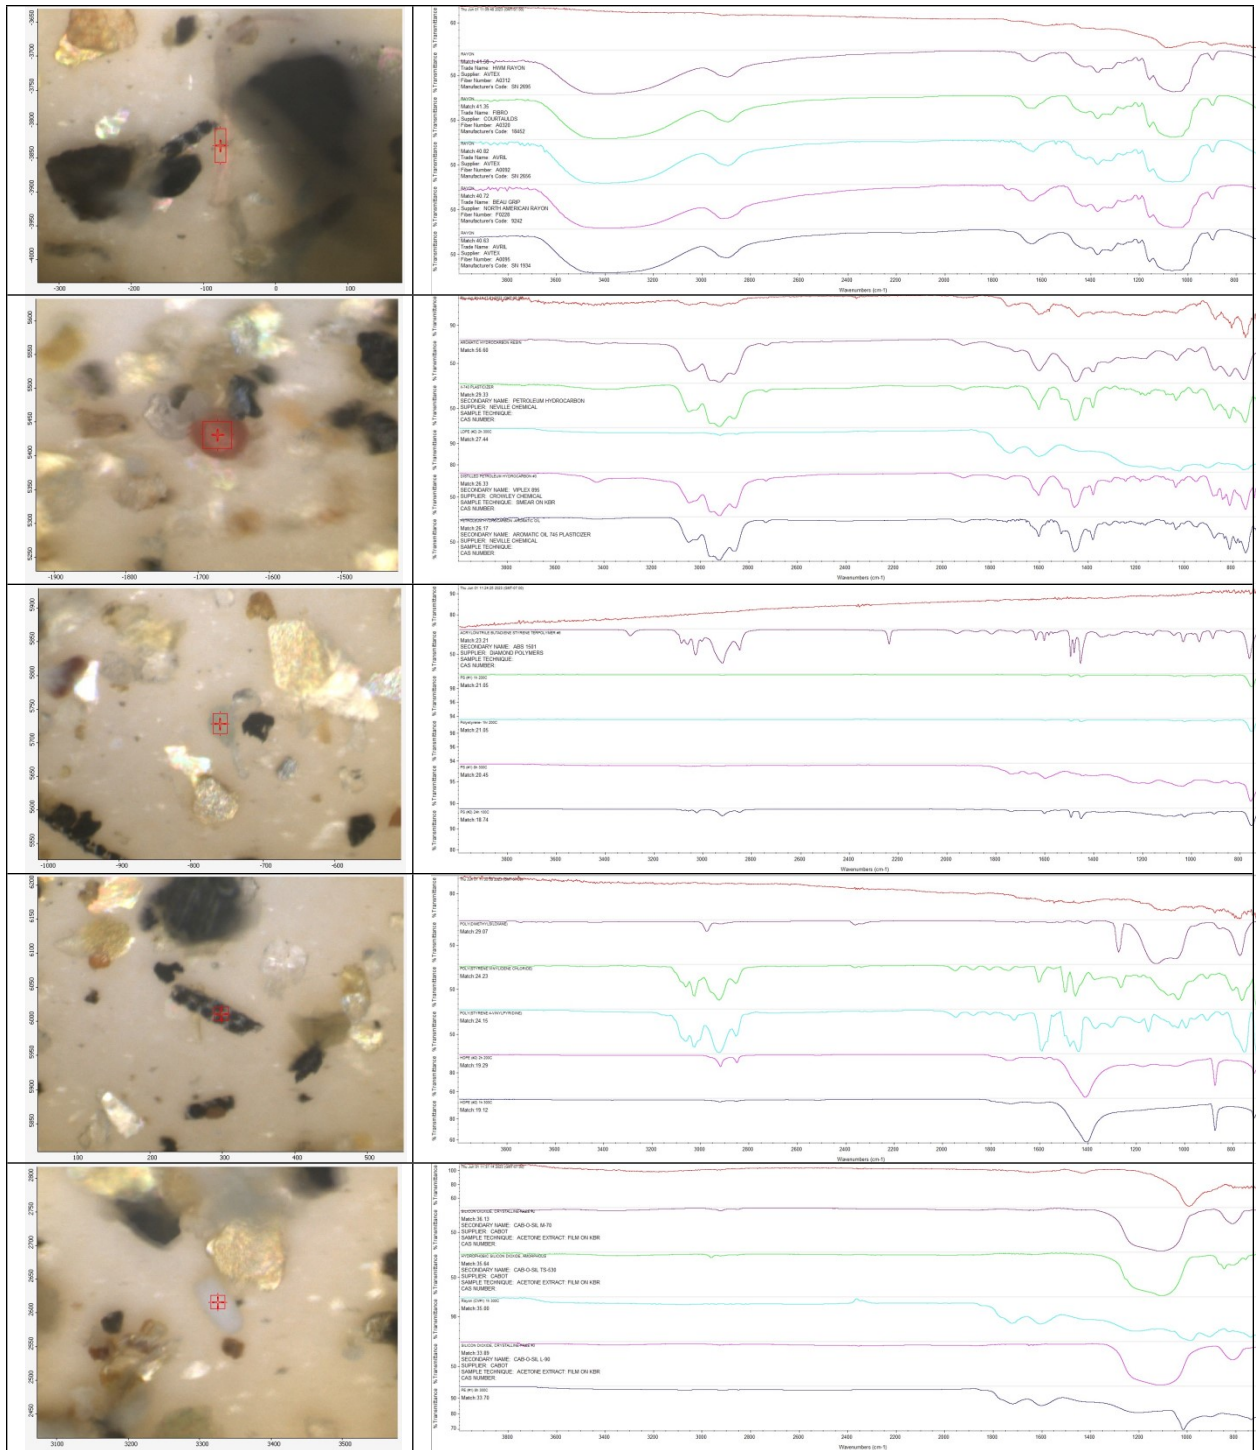

**Table S9: ATR-FTIR spectra, Boomer Creek, Sieving**

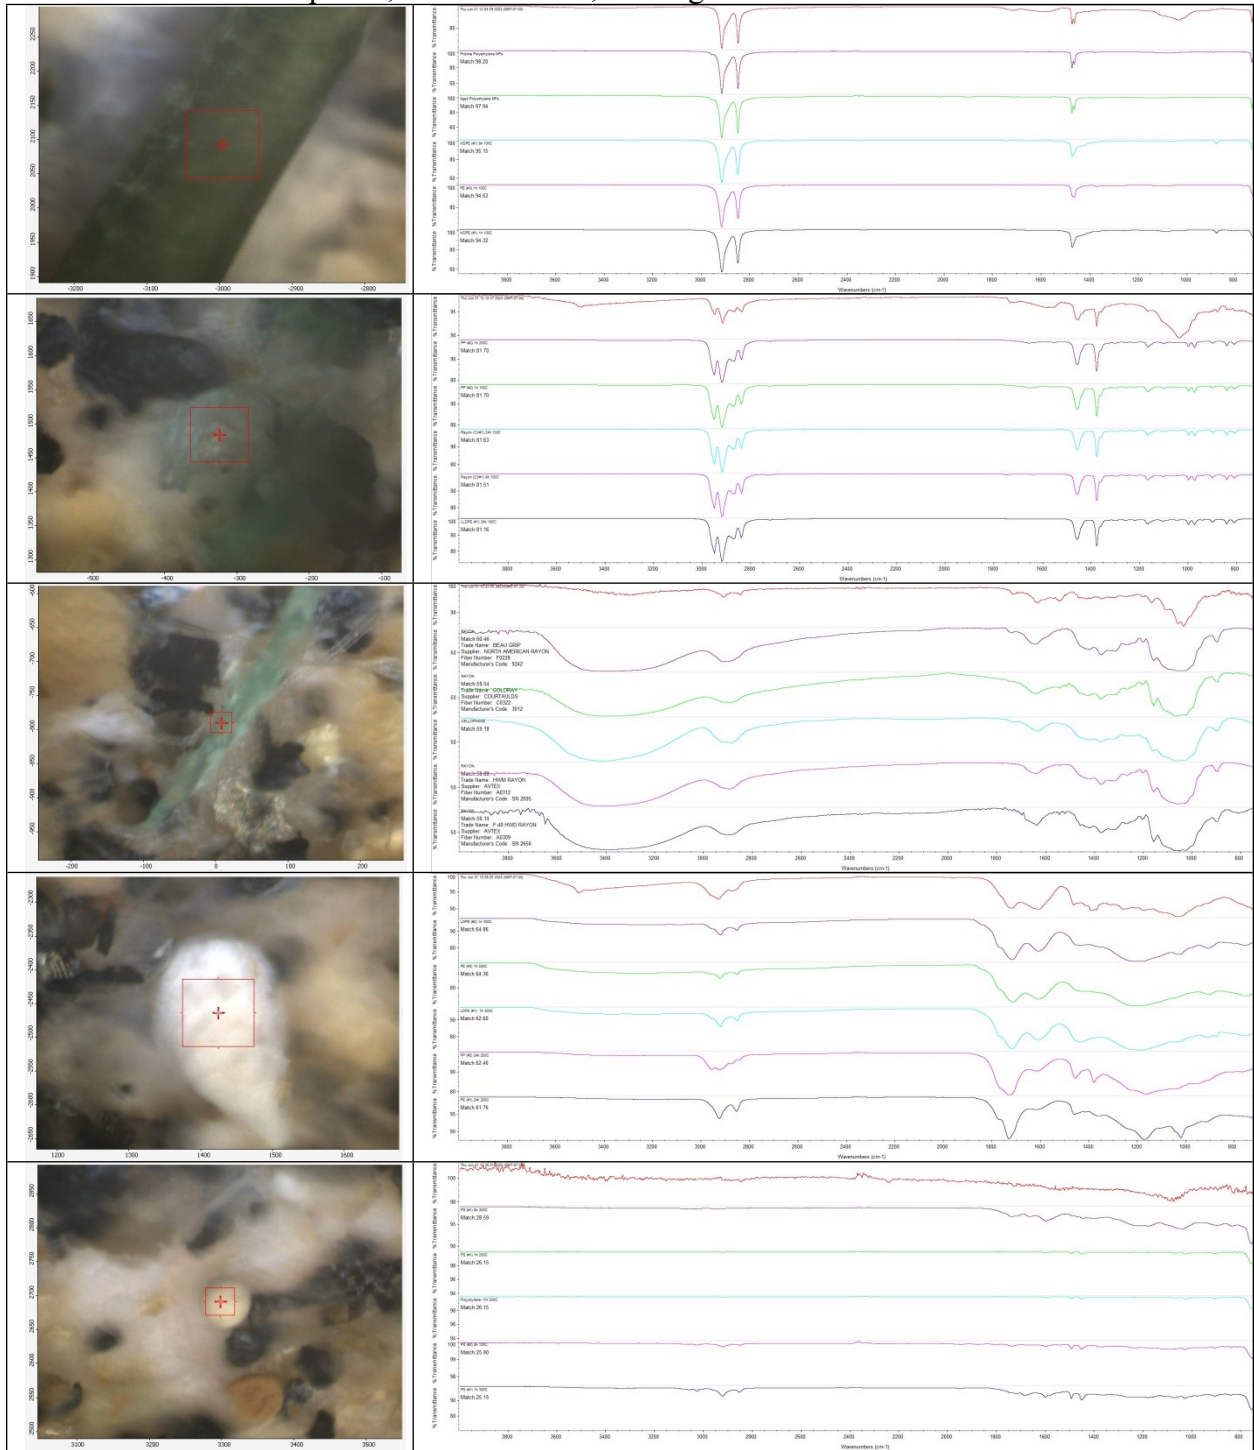

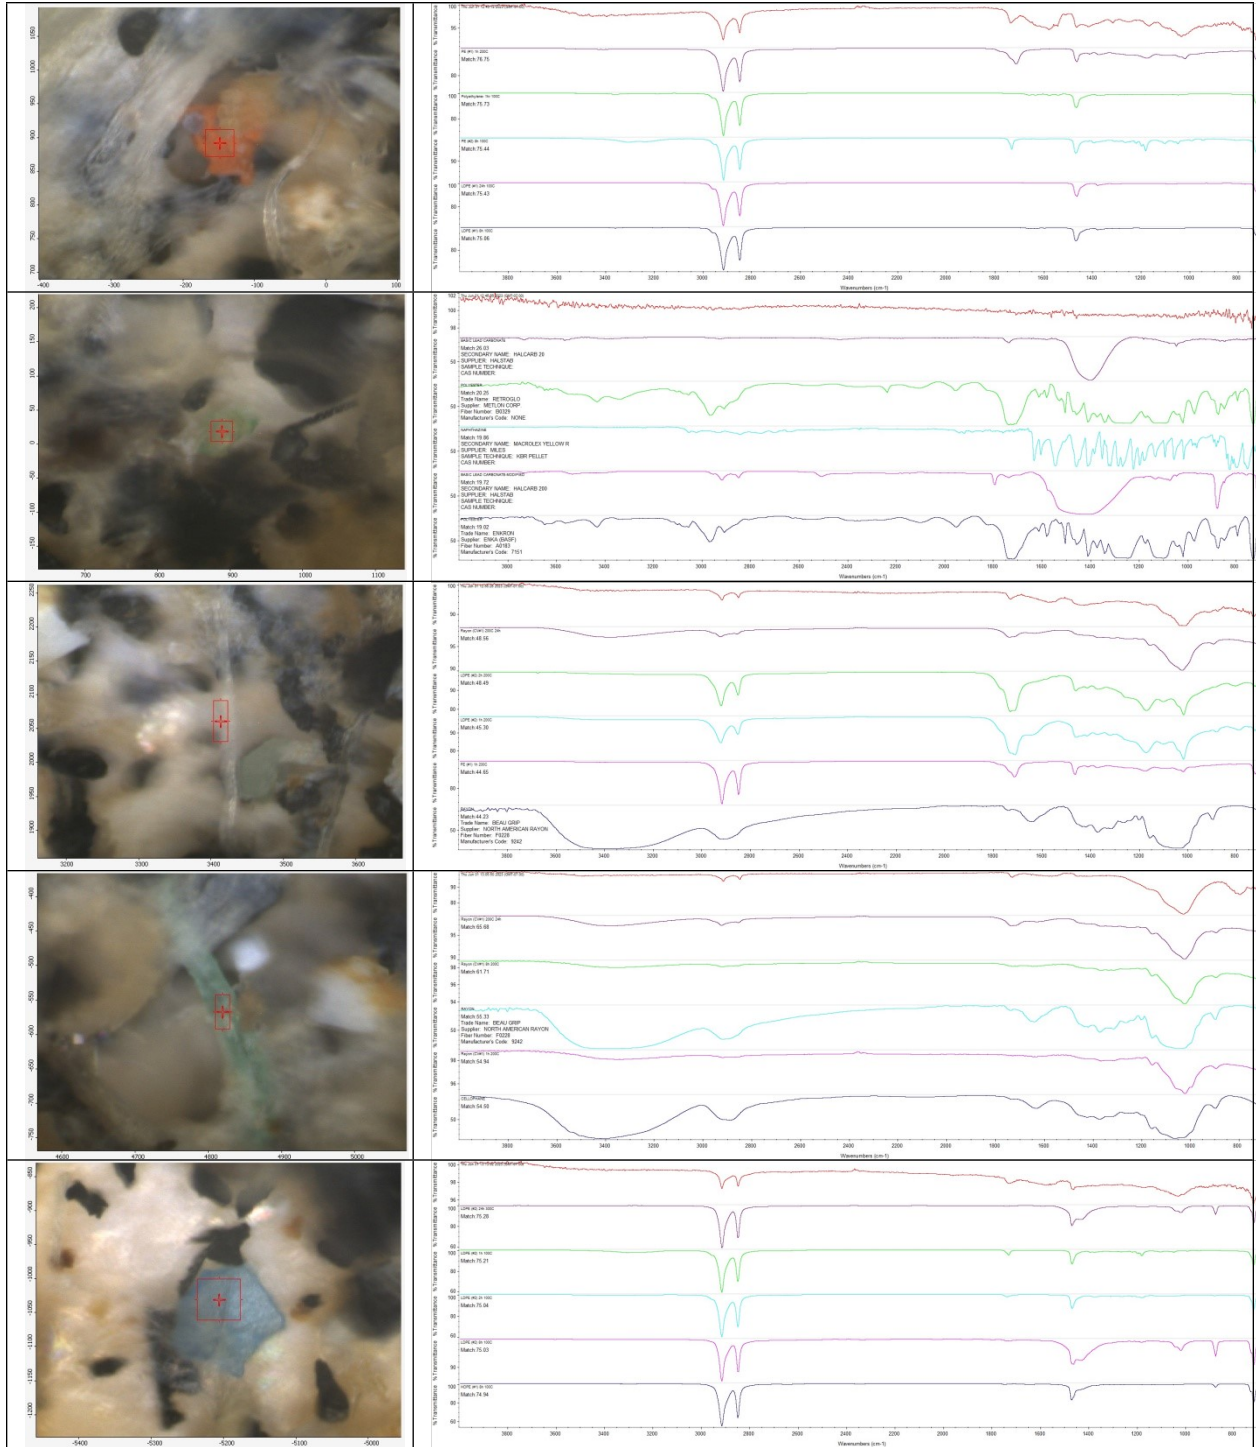

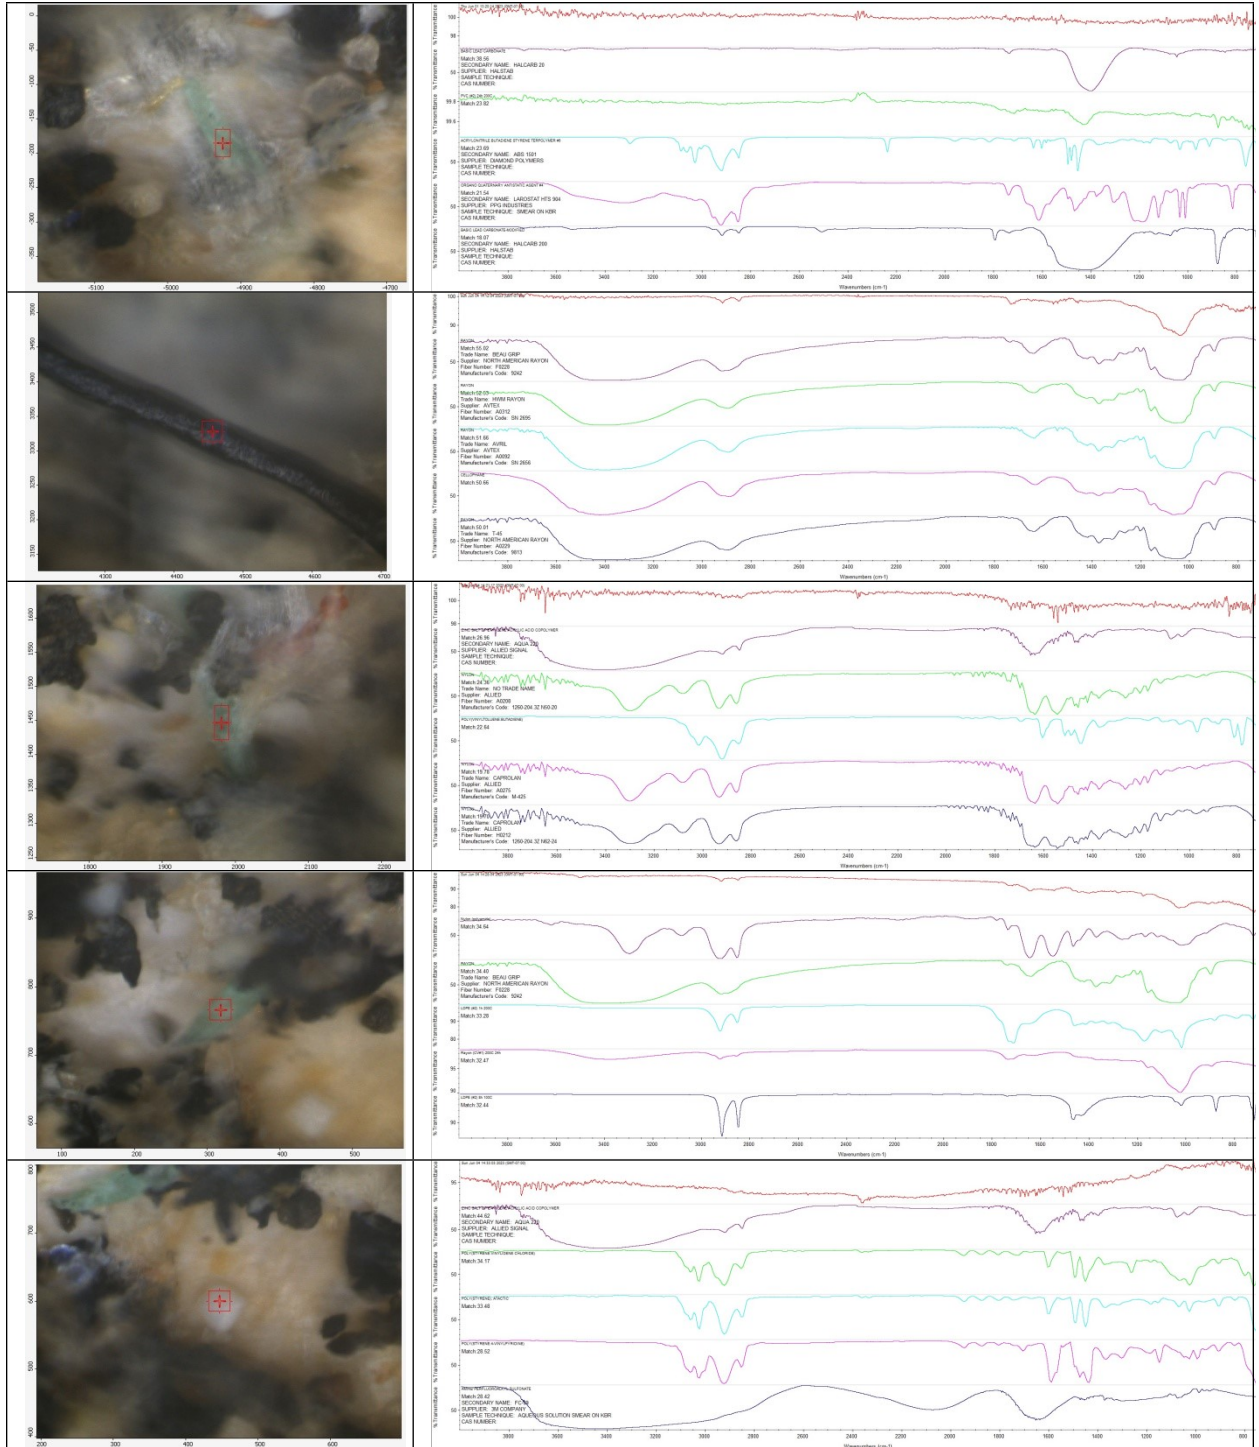

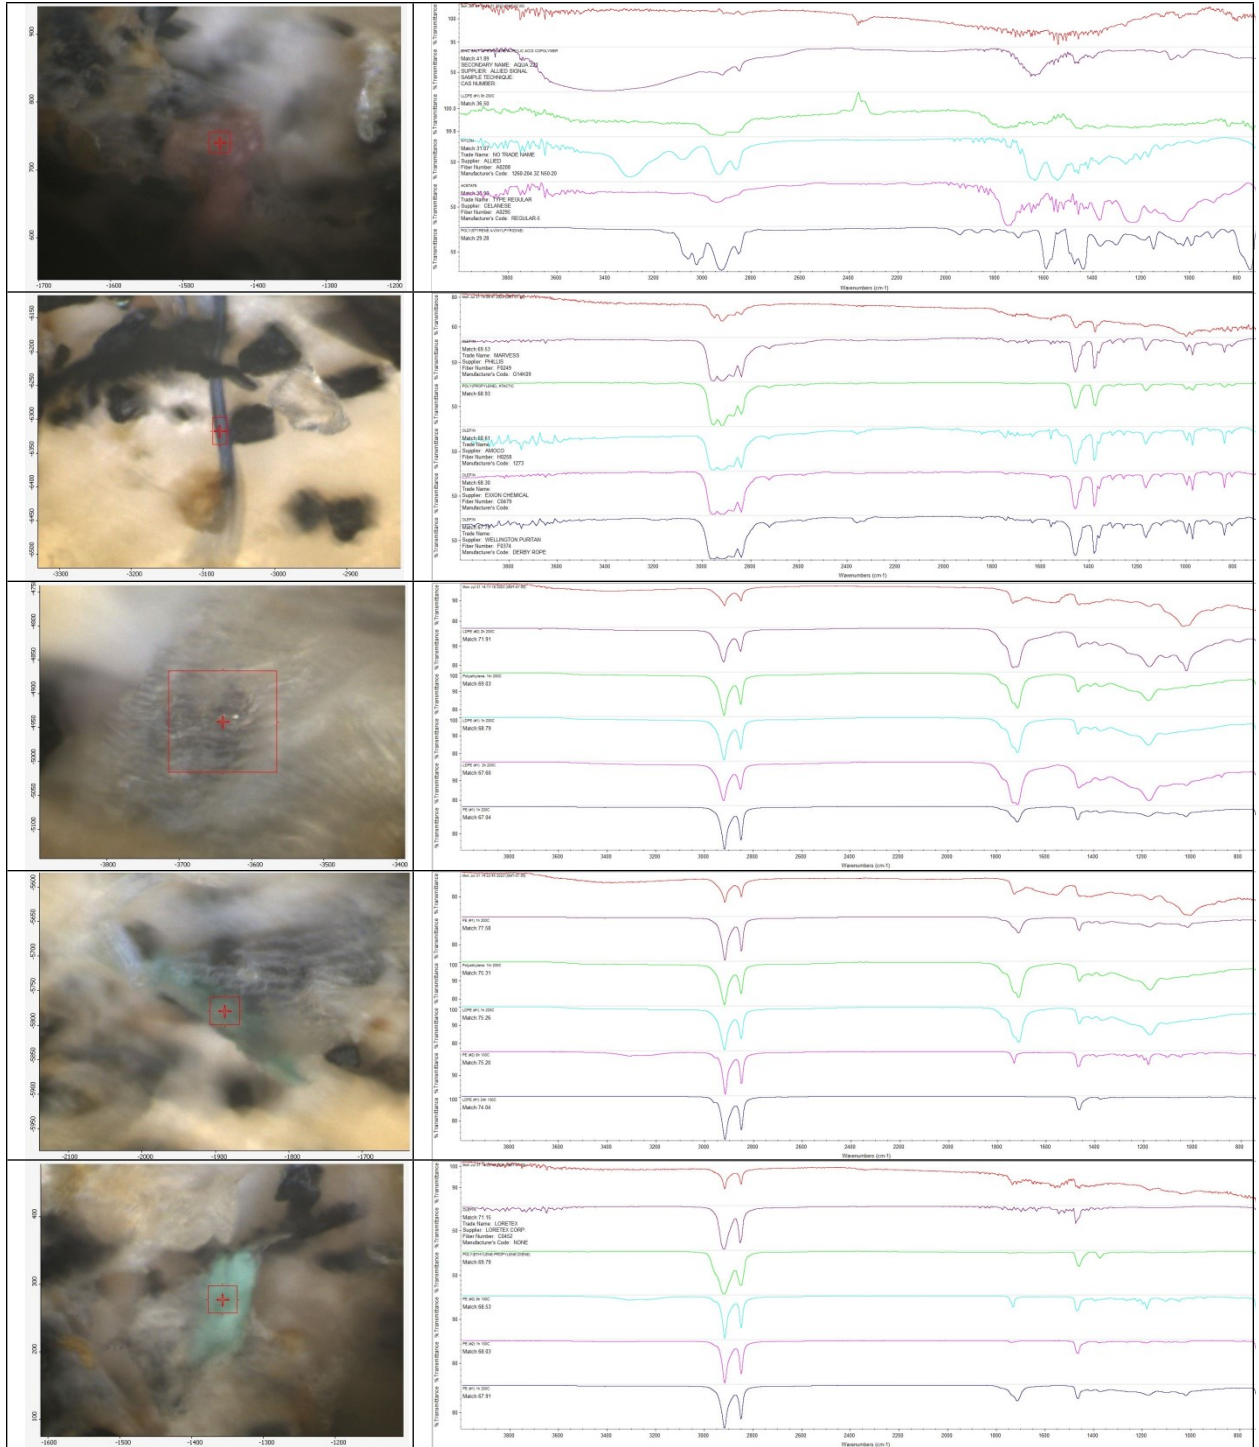

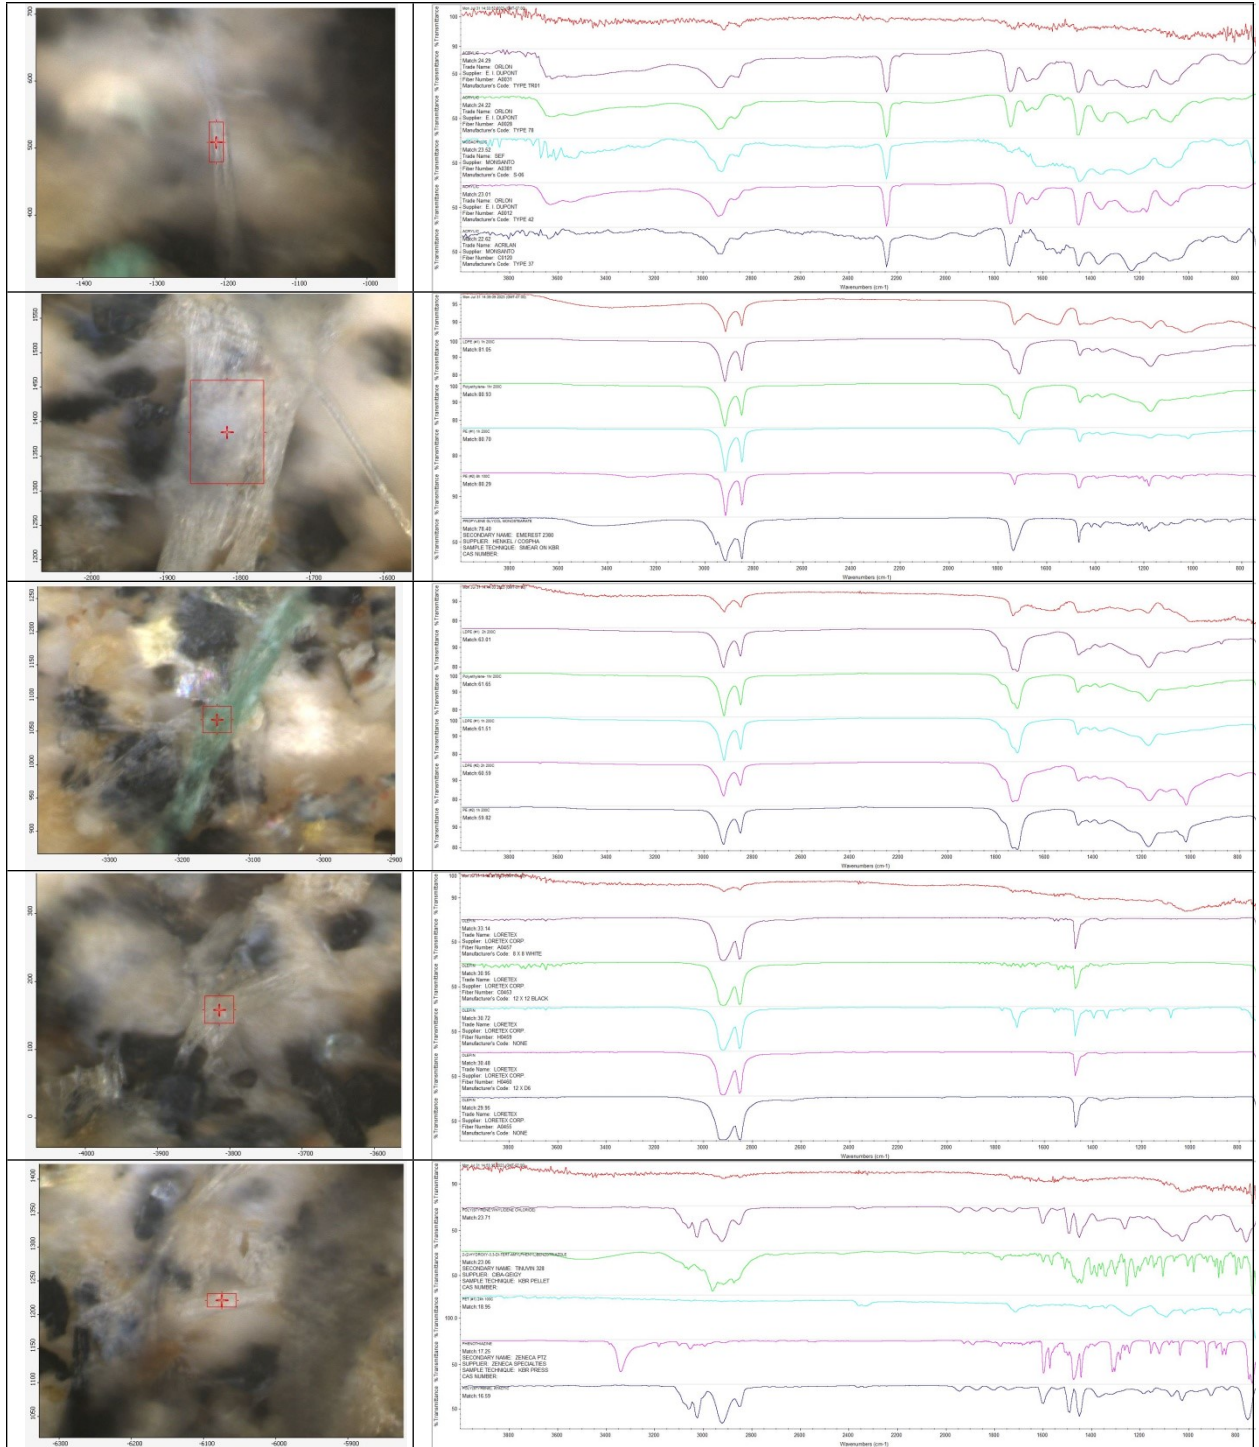



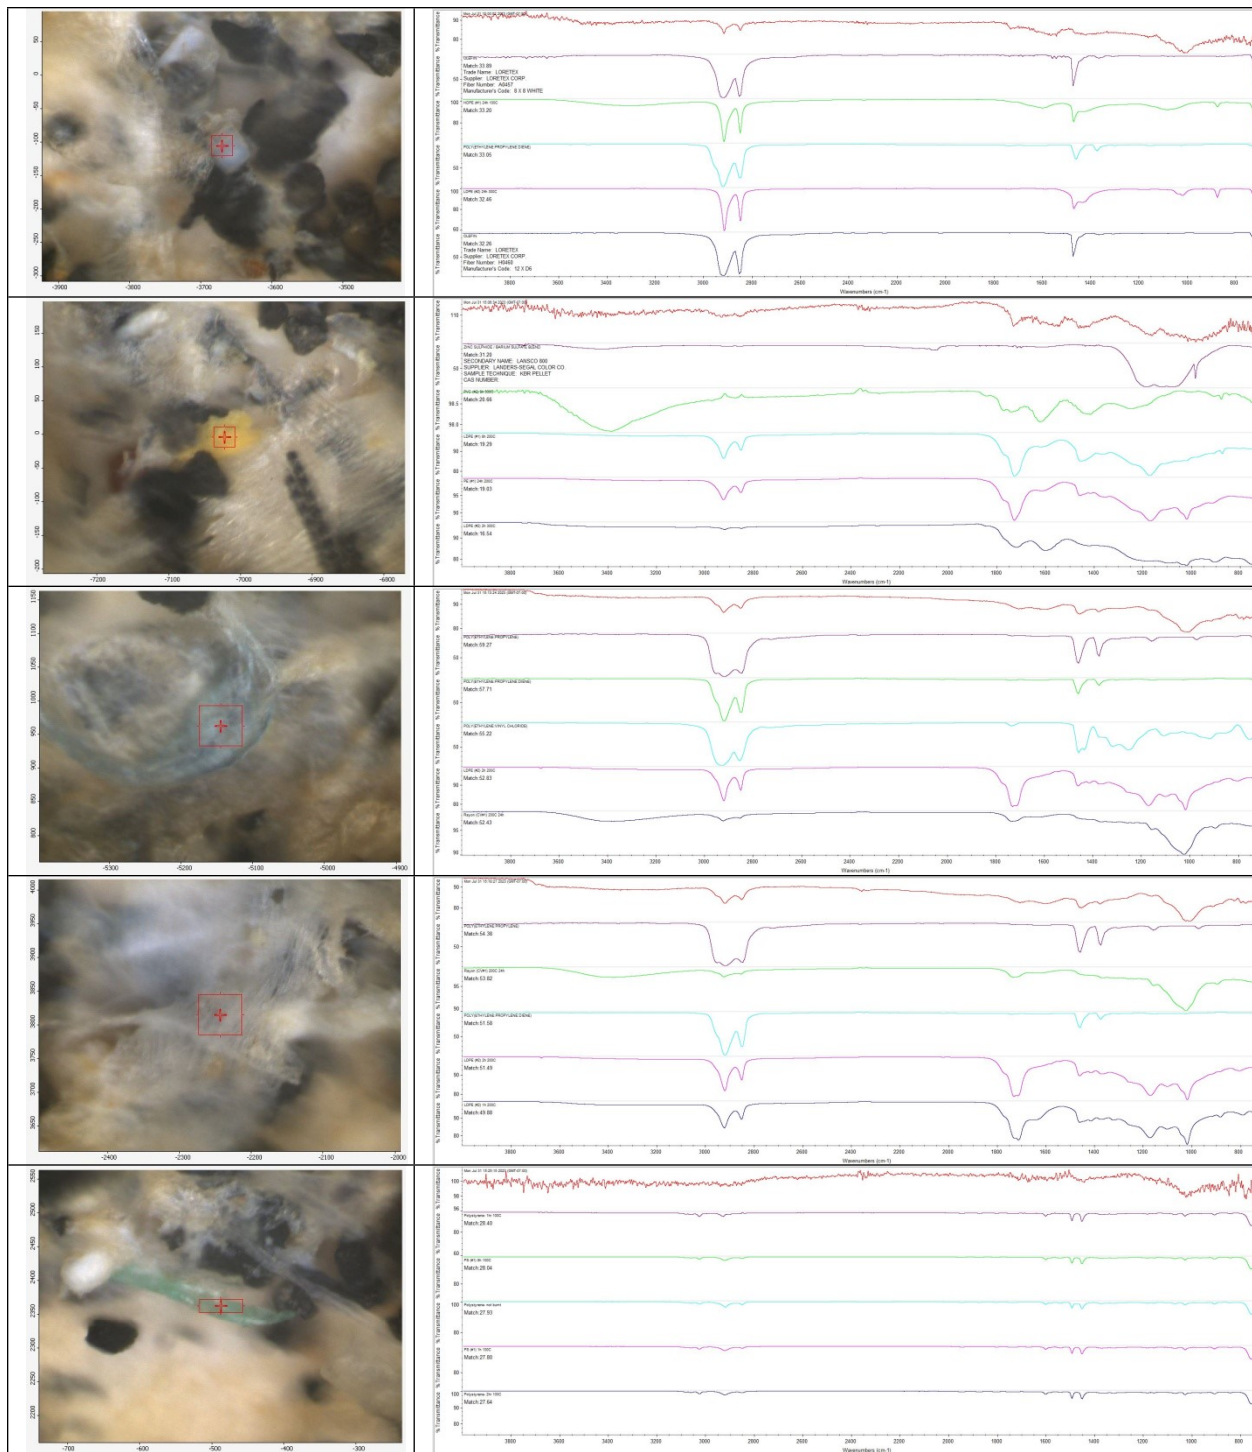

**Table S10: ATR-FTIR spectra, Boomer Creek, Elutriation**

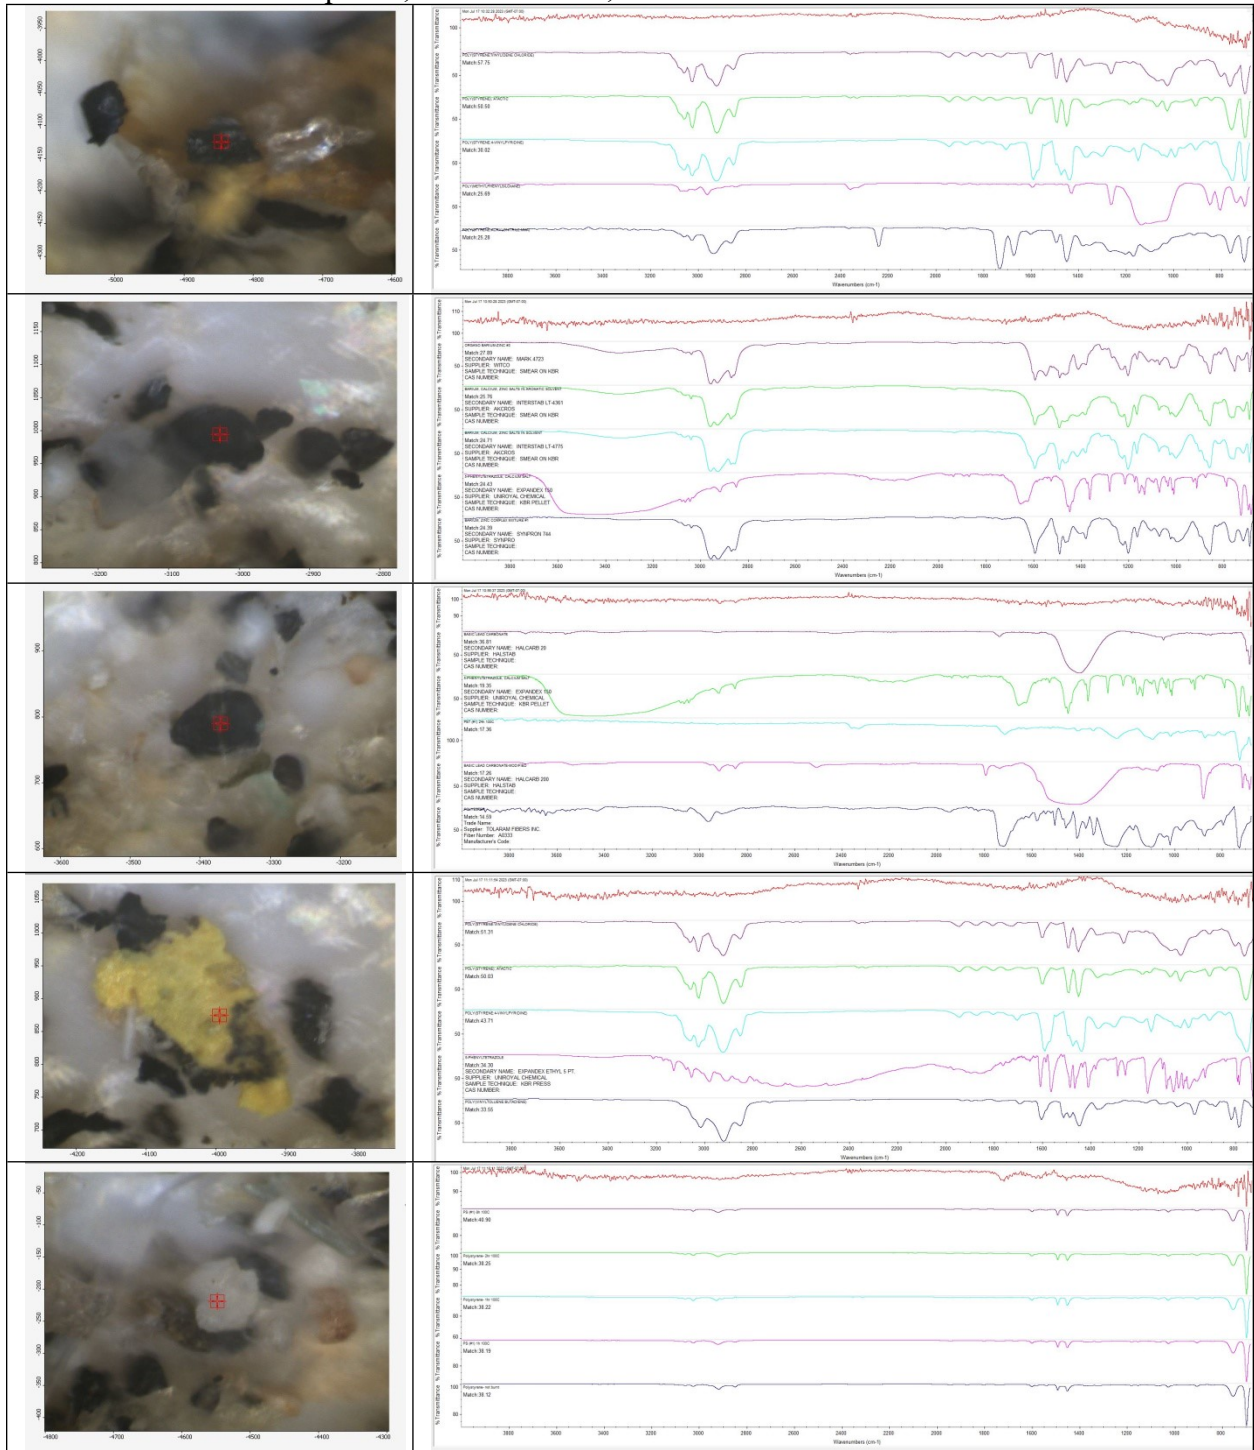

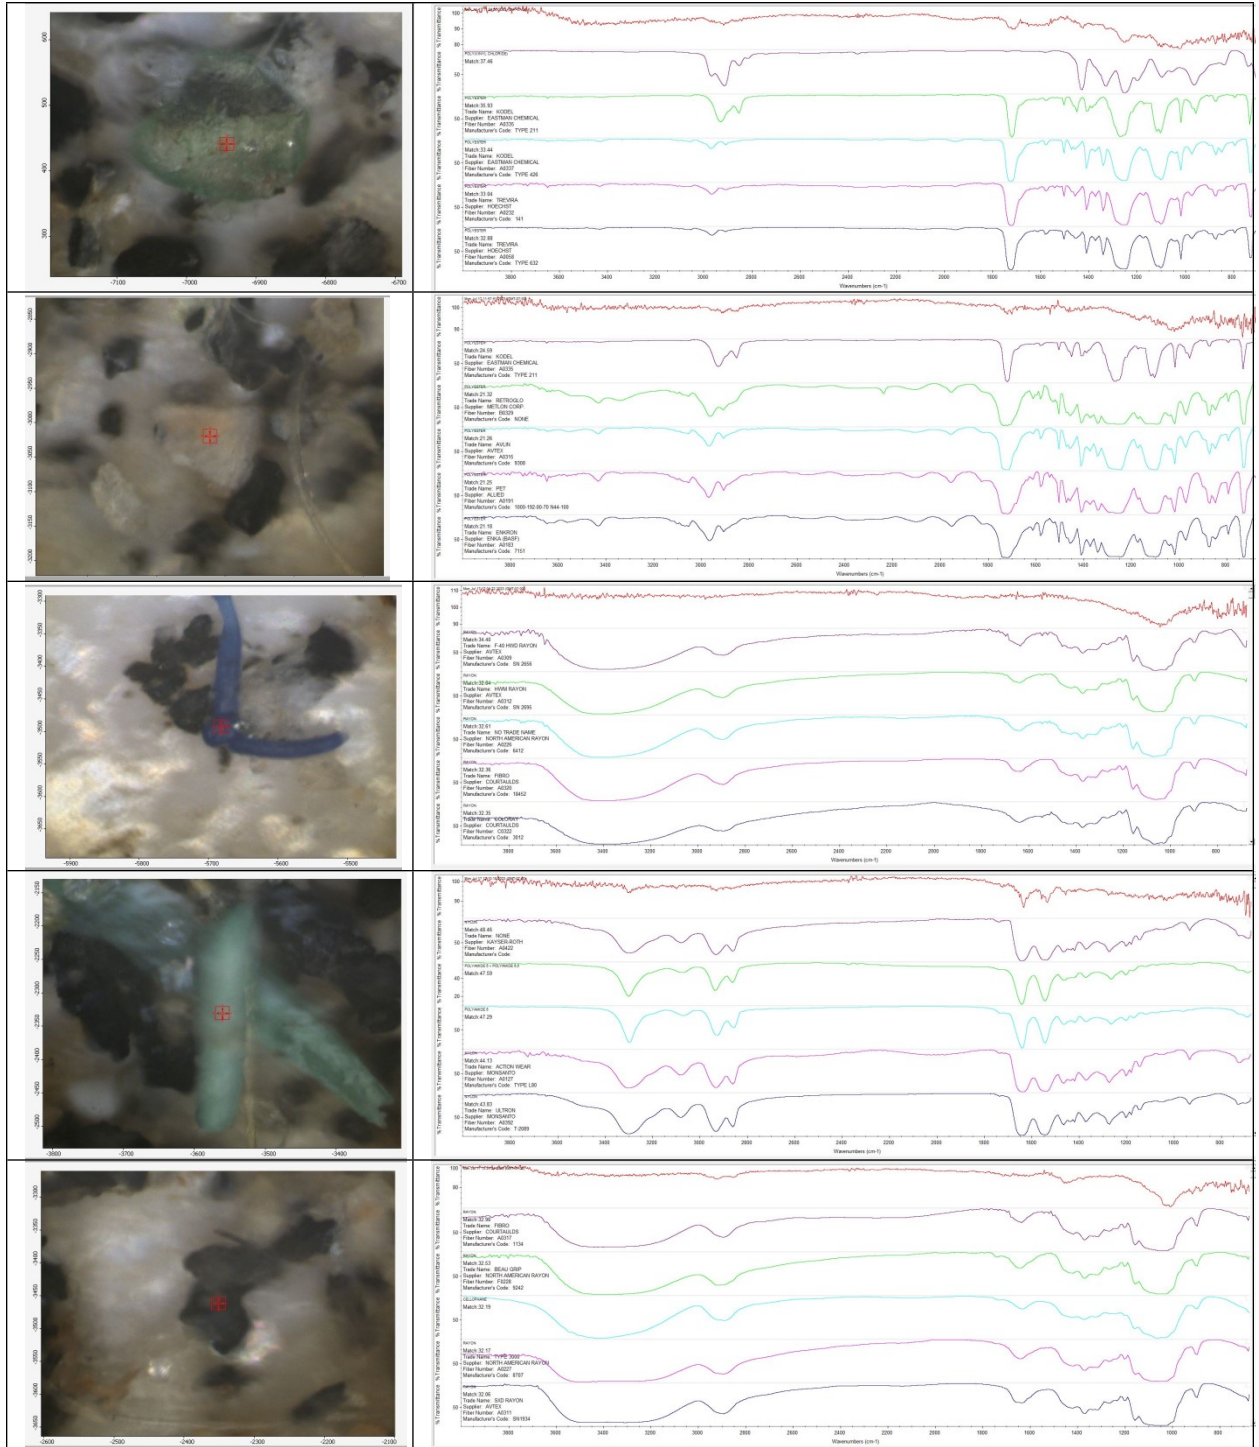

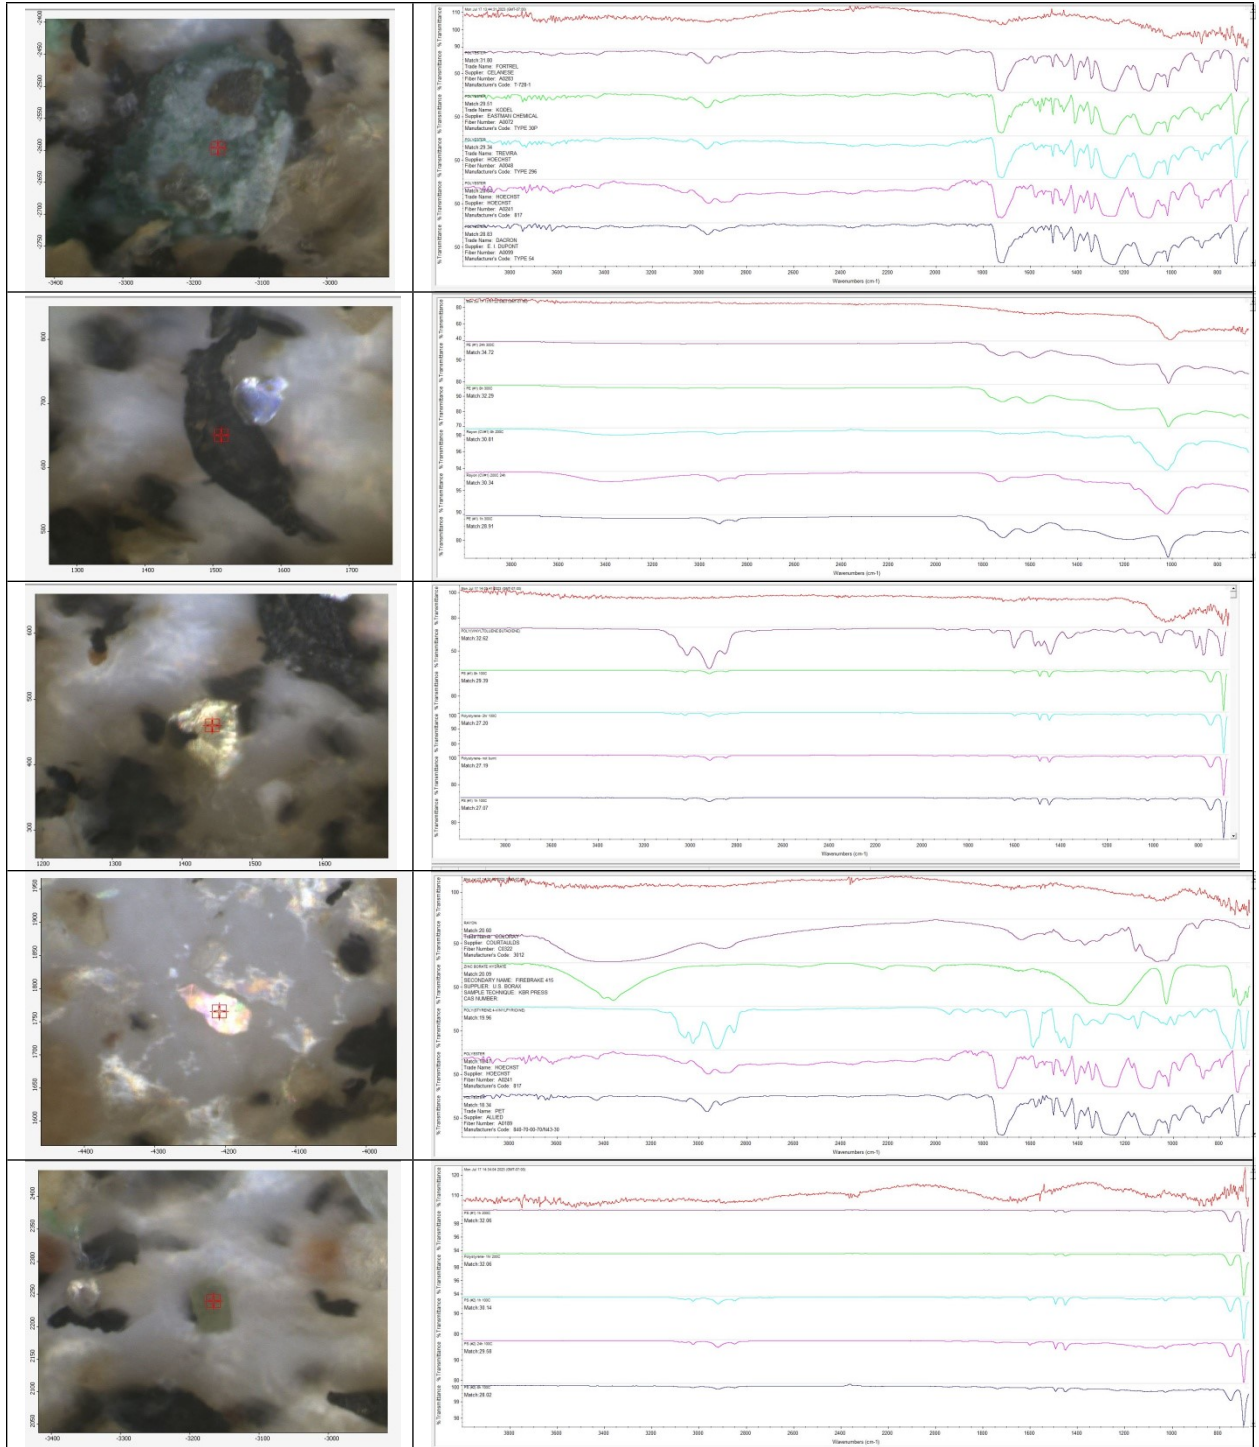



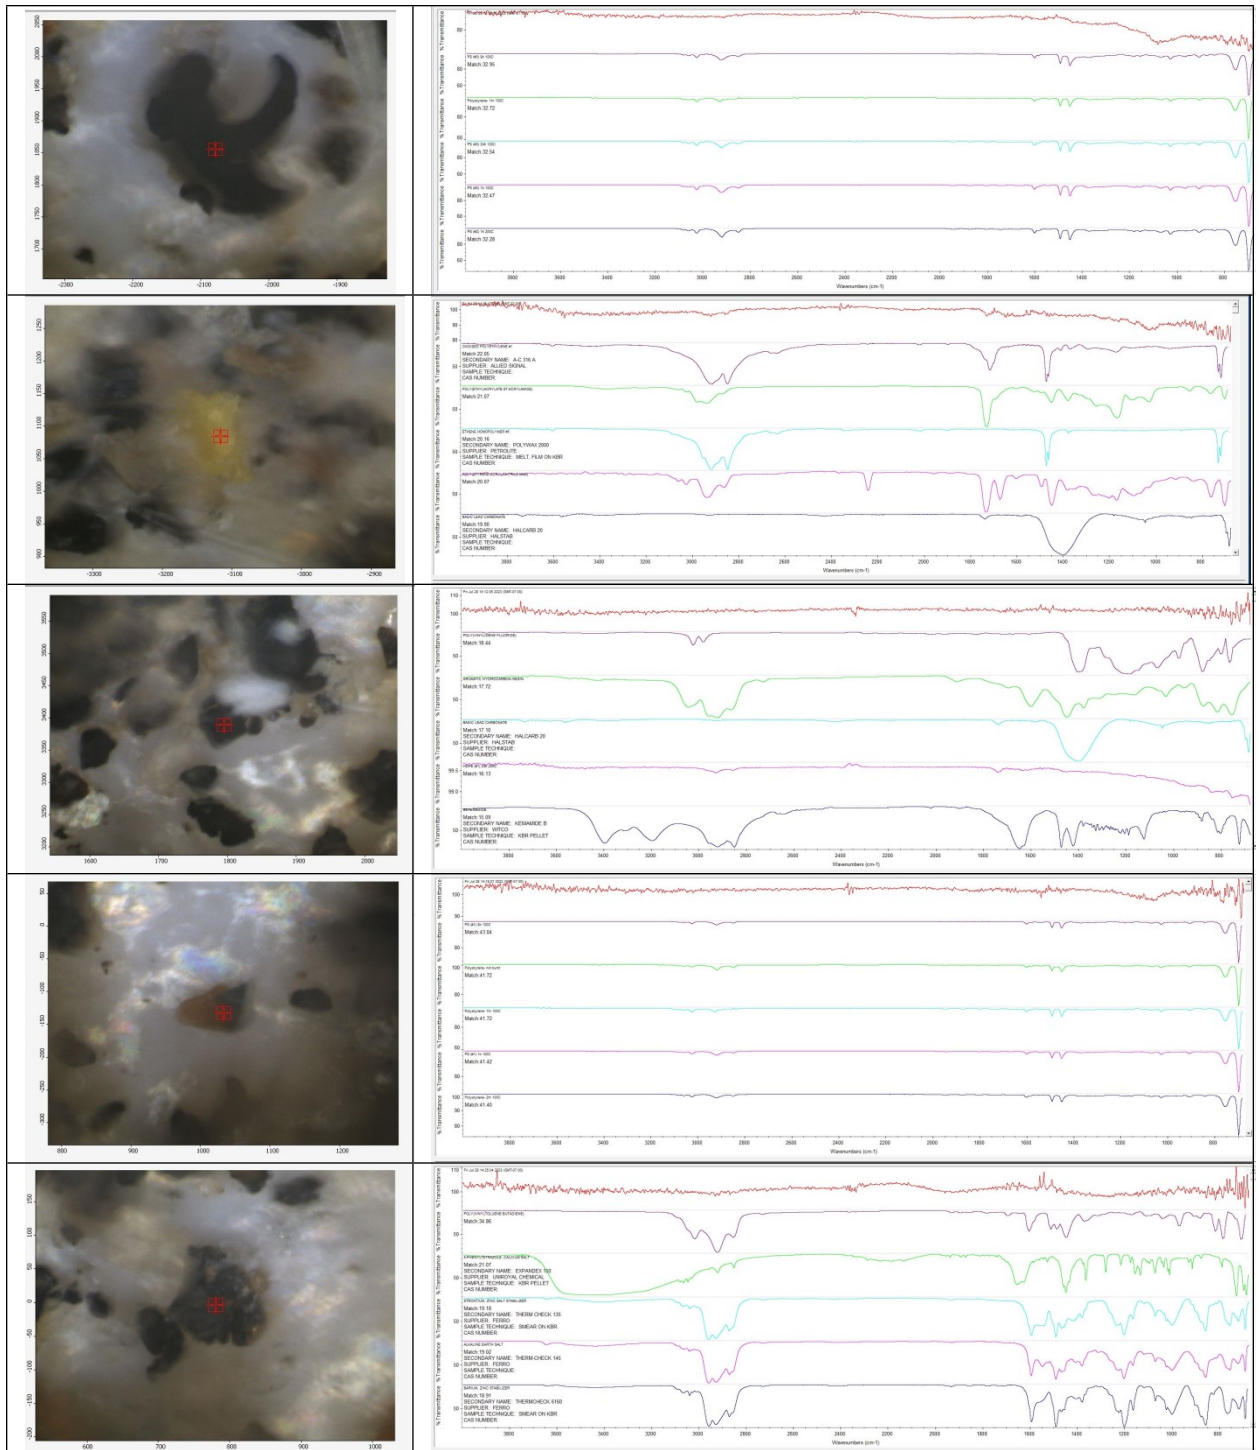

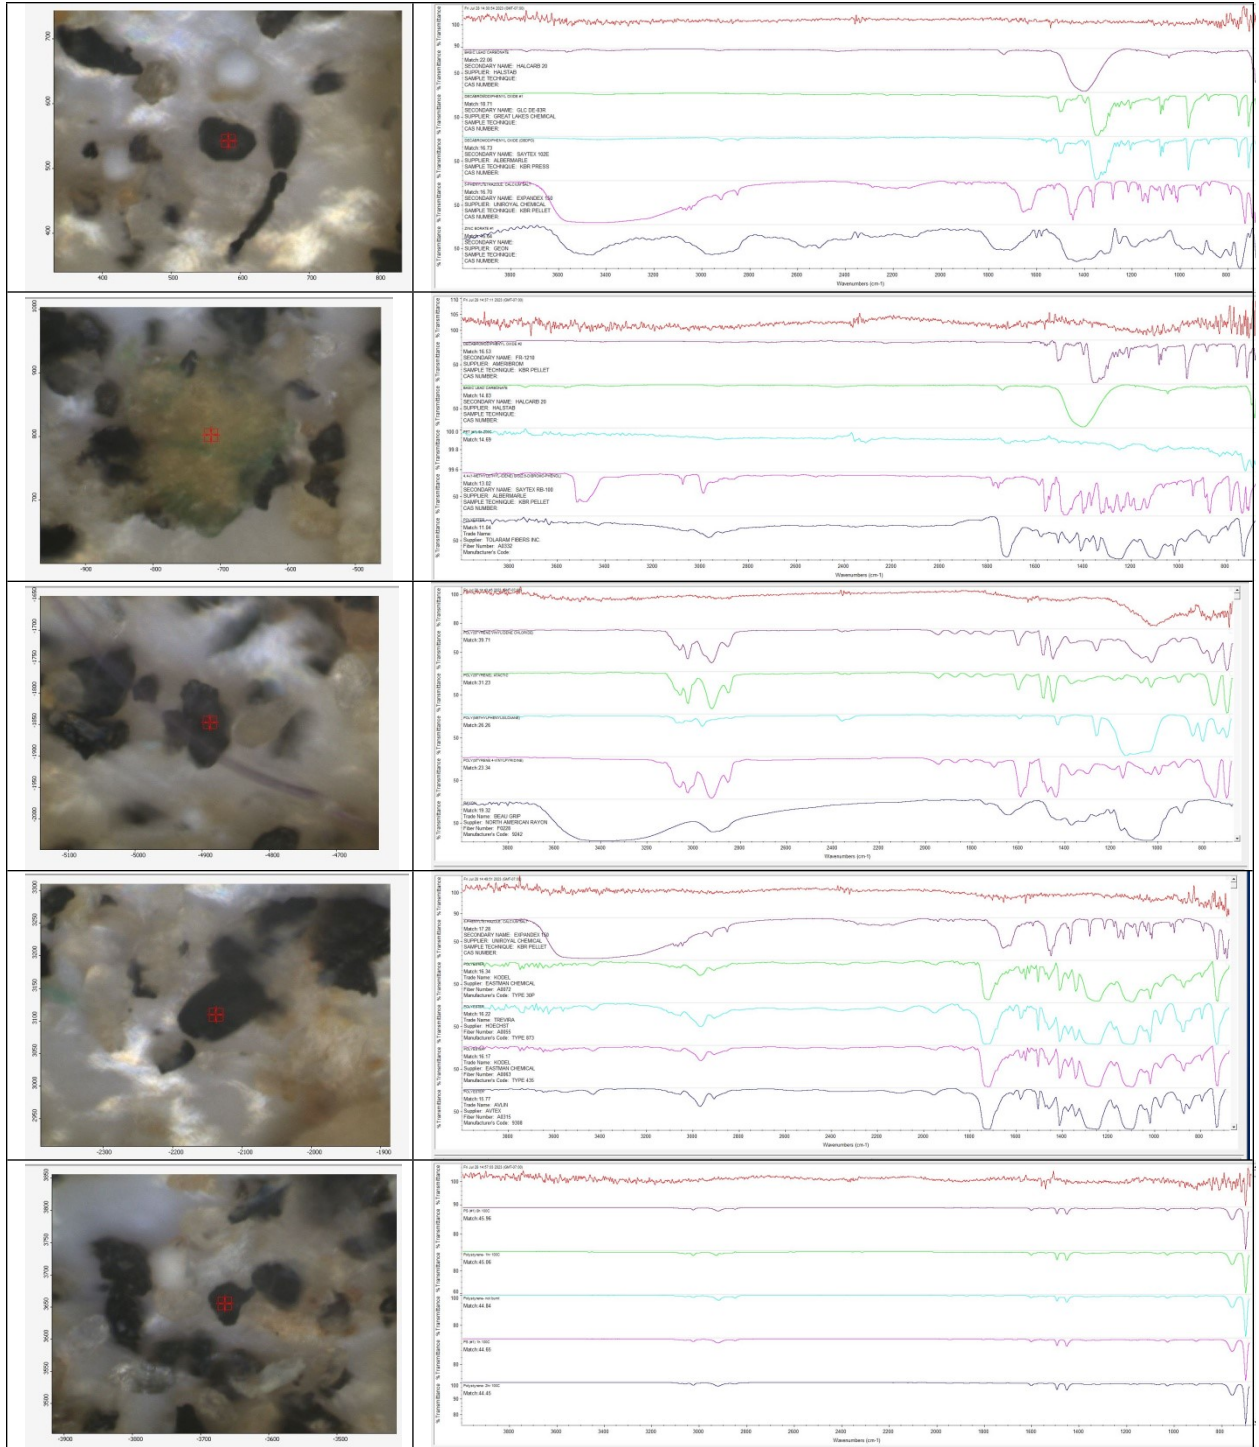

**Table S11: ATR-FTIR spectra, Applied Biosolids 1, Sieving**

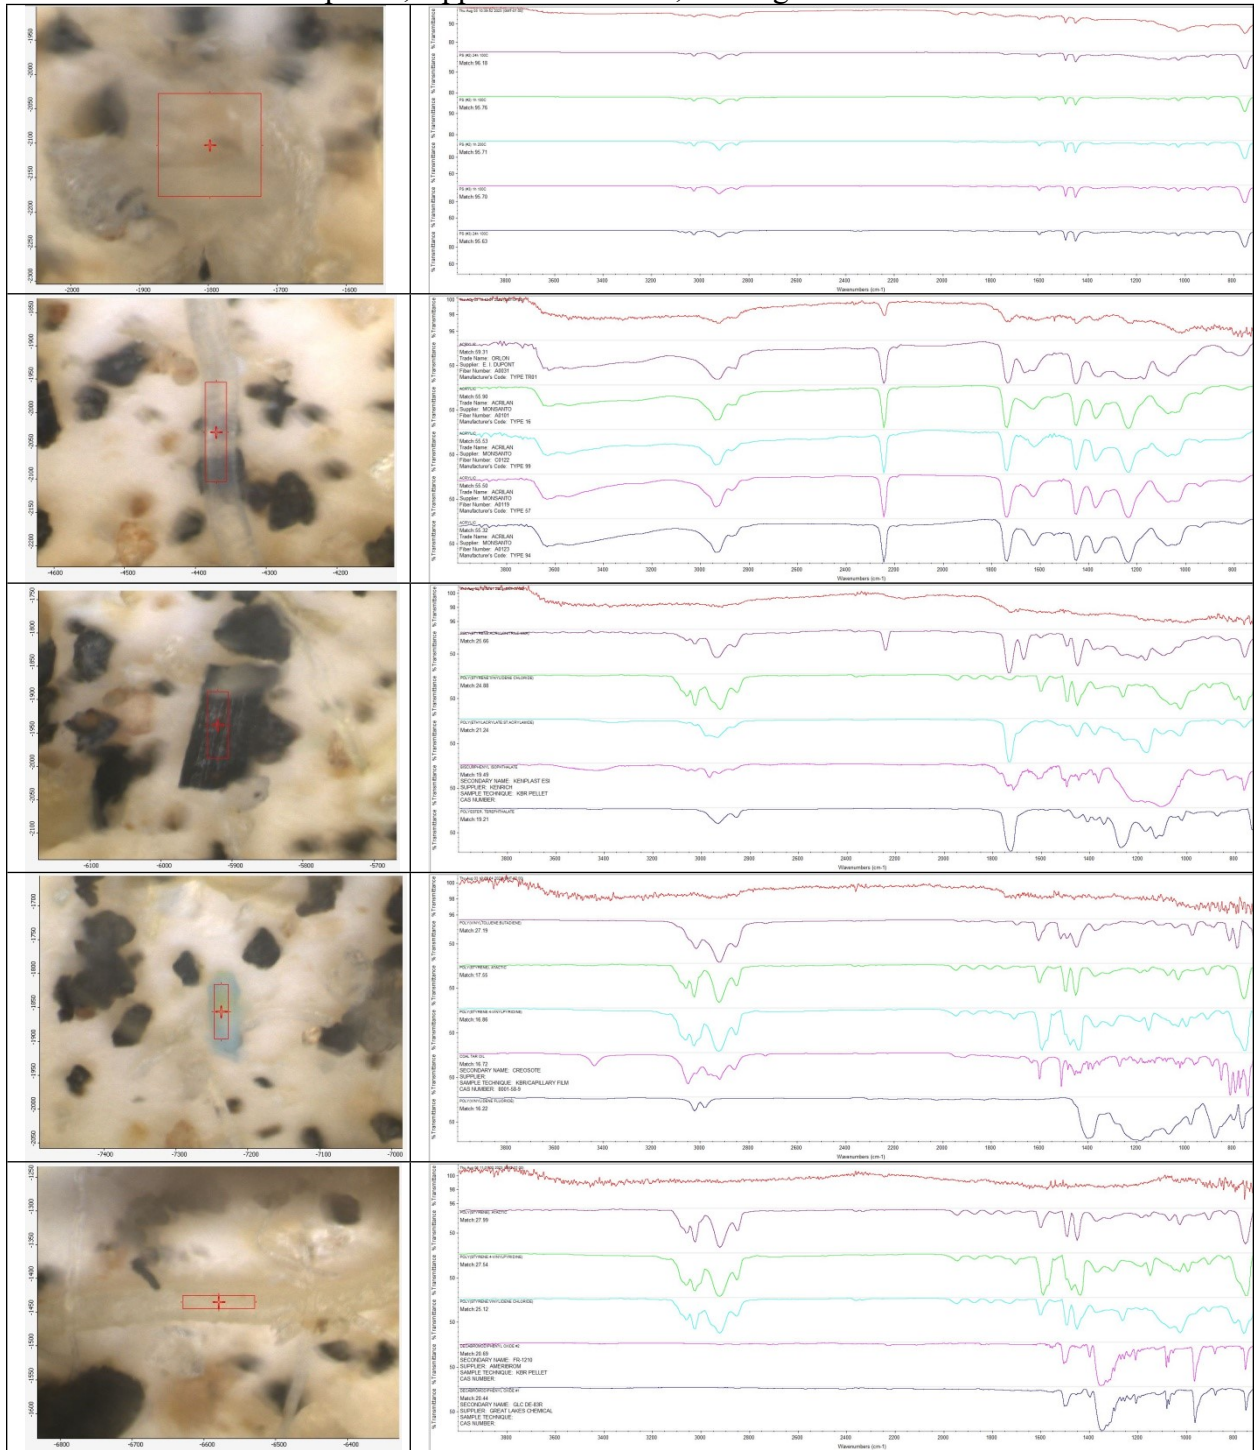



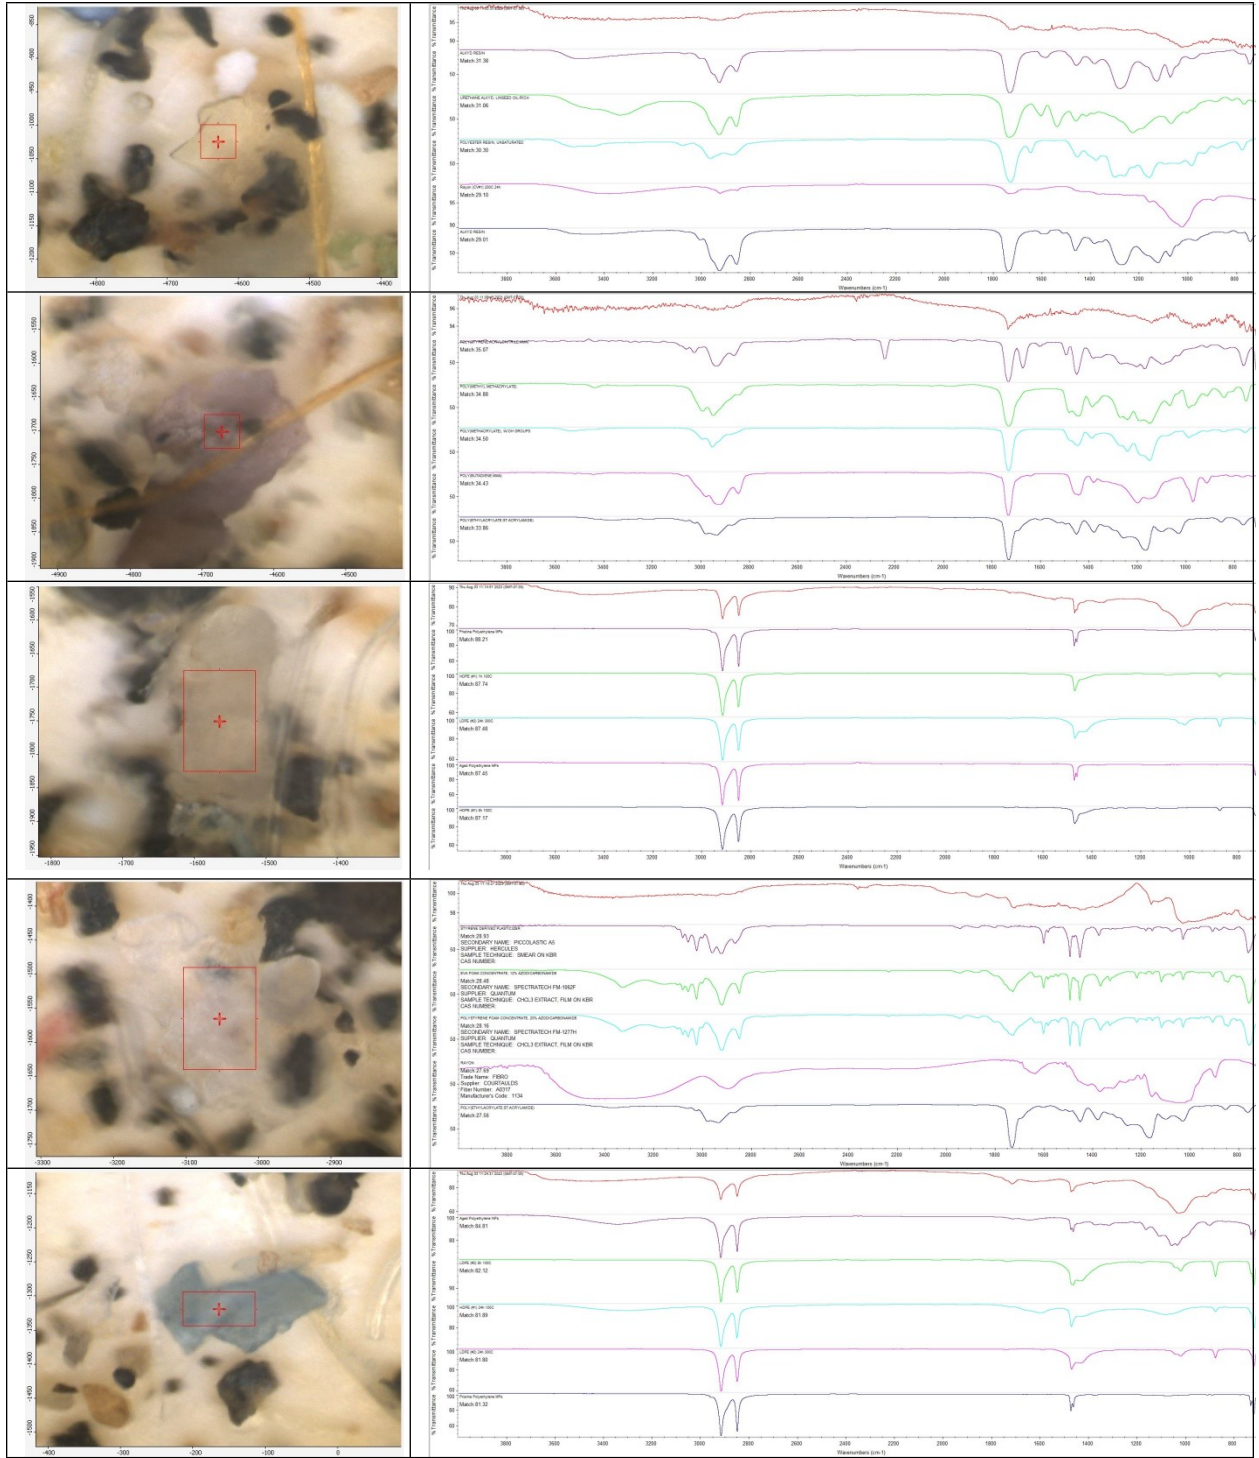



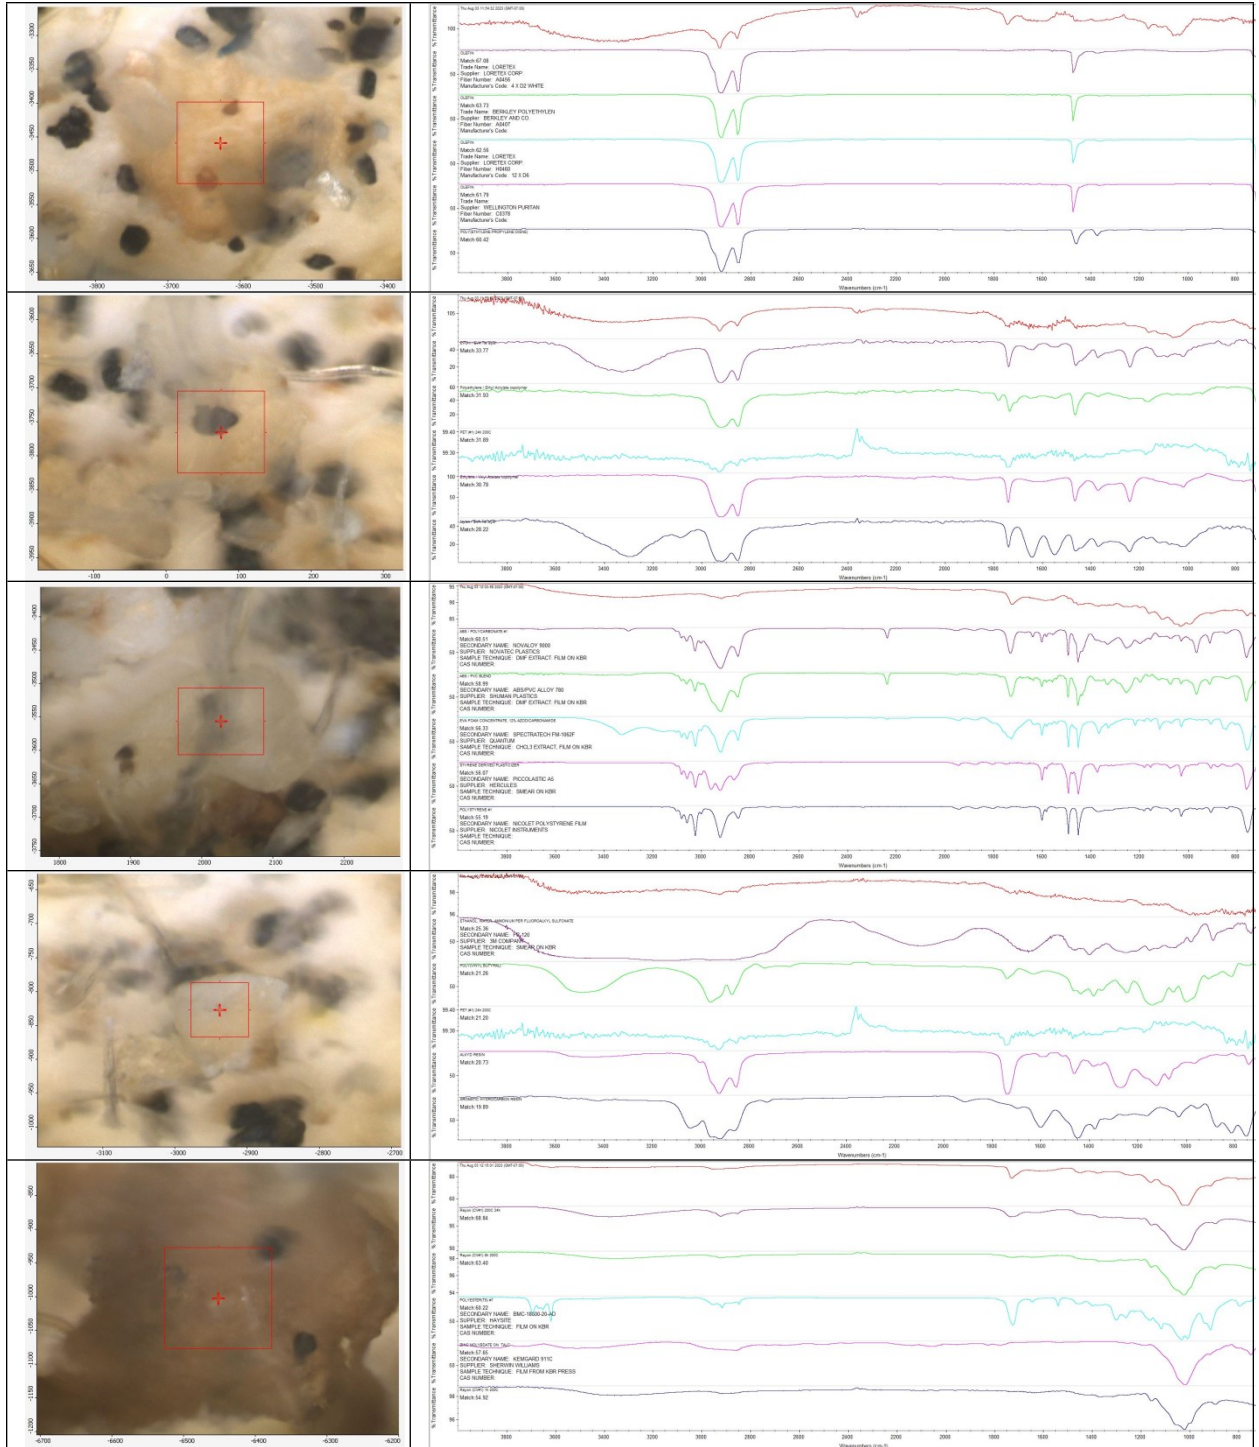

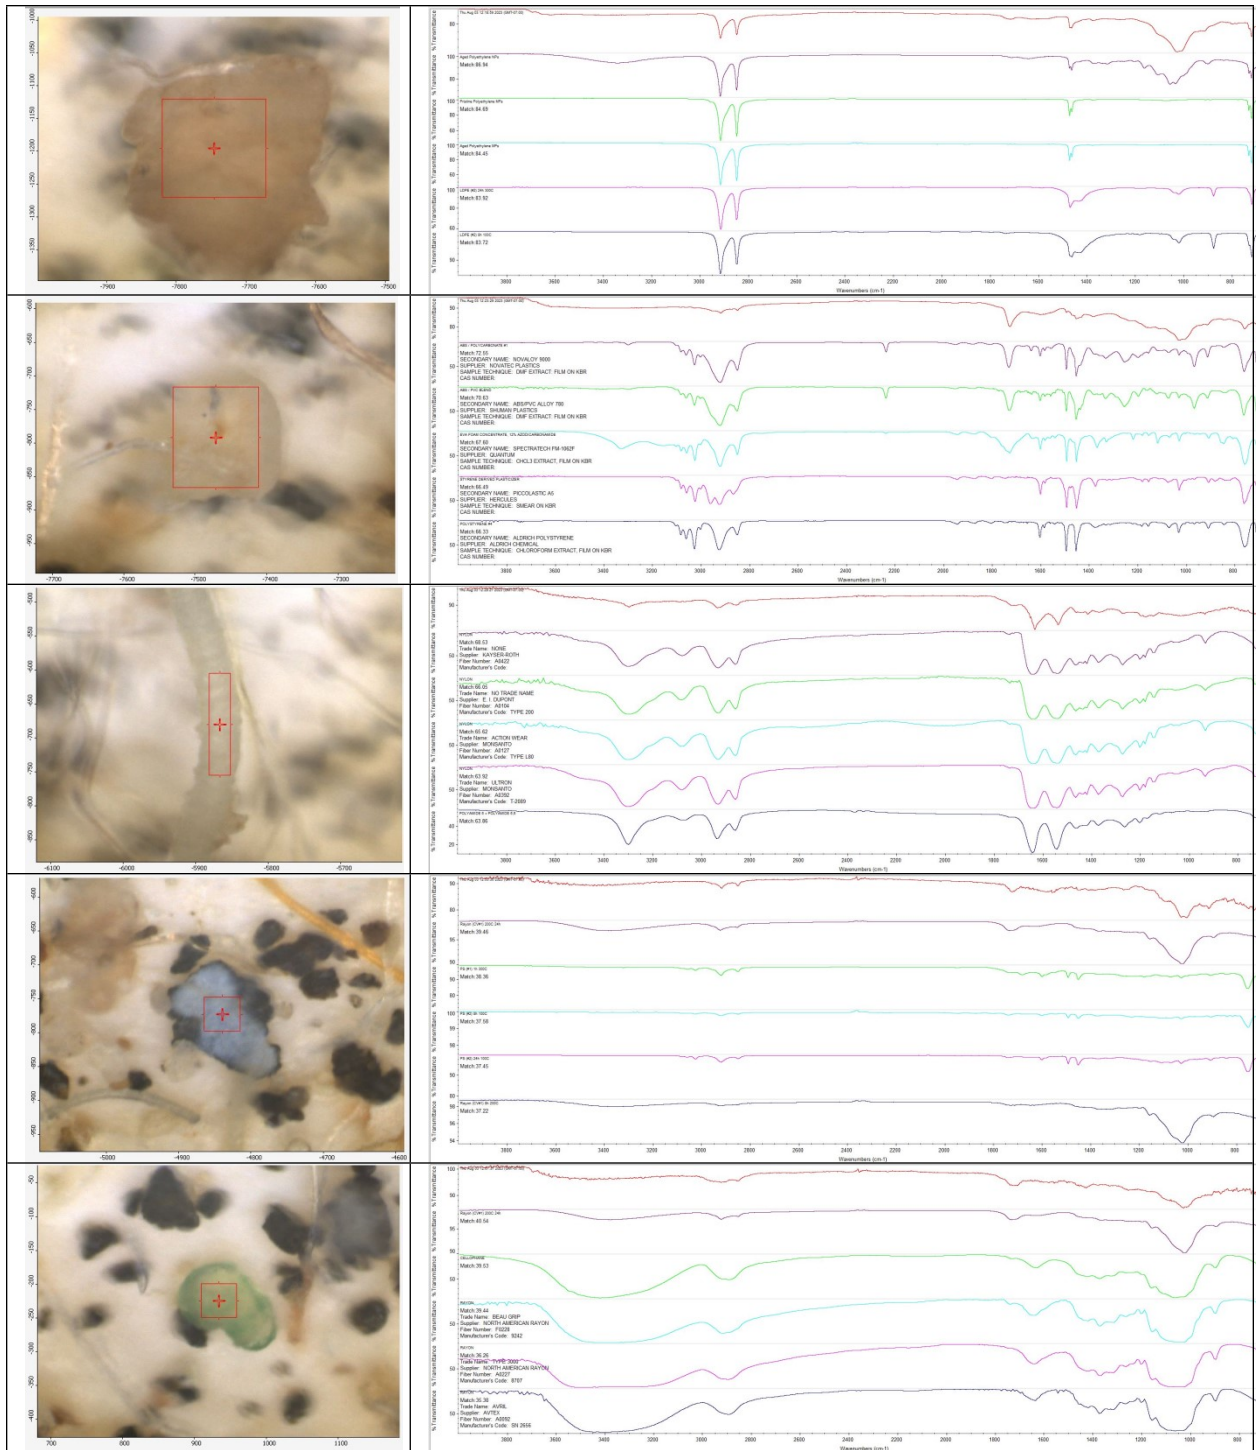

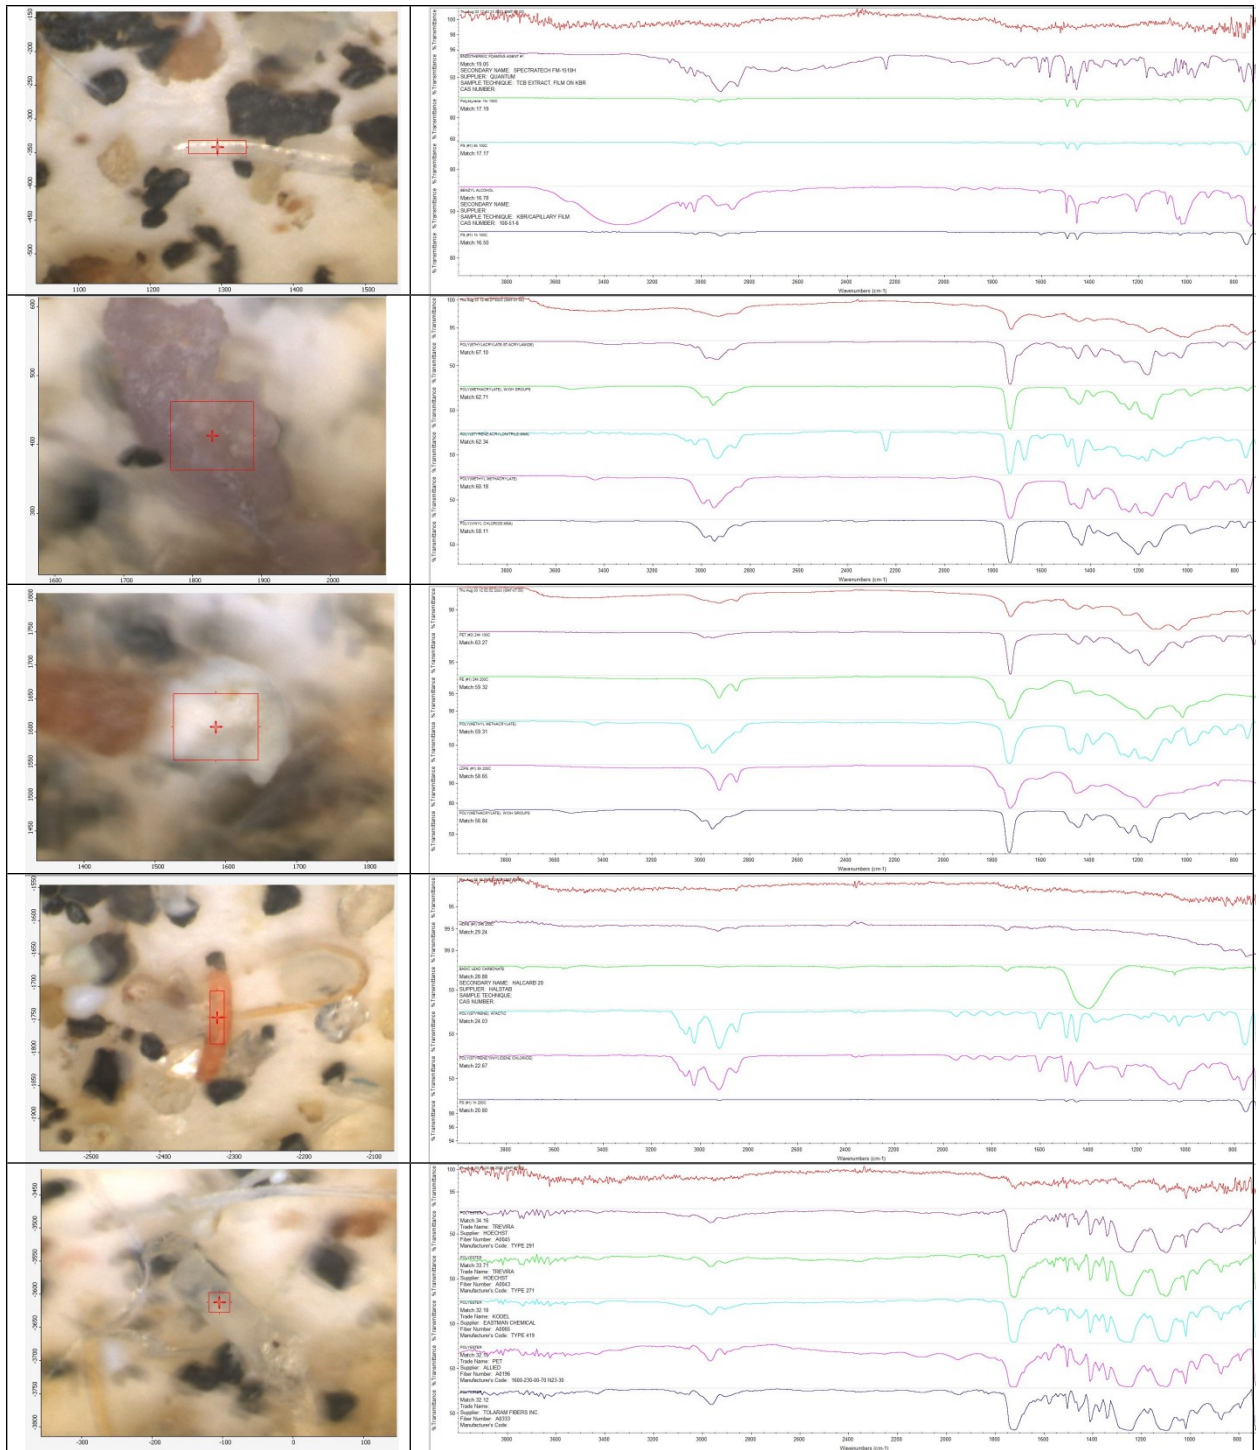

**Table S12: ATR-FTIR spectra, Applied Biosolids 1, Elutriation**

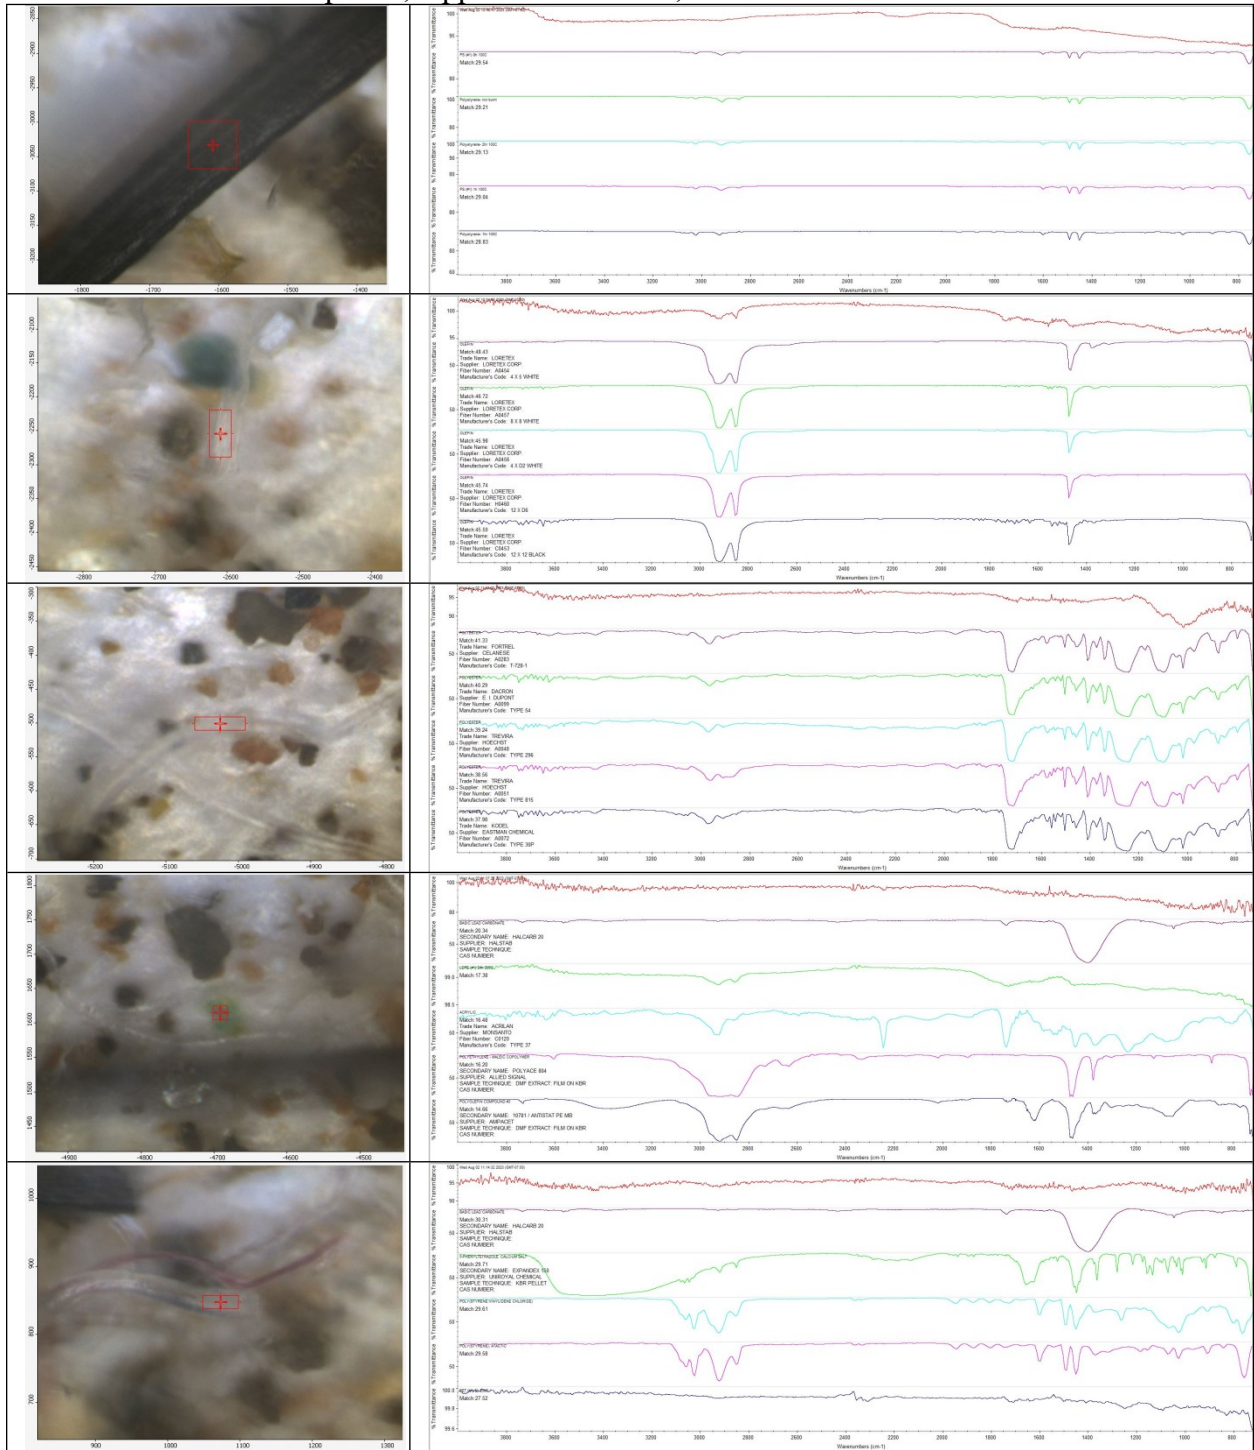

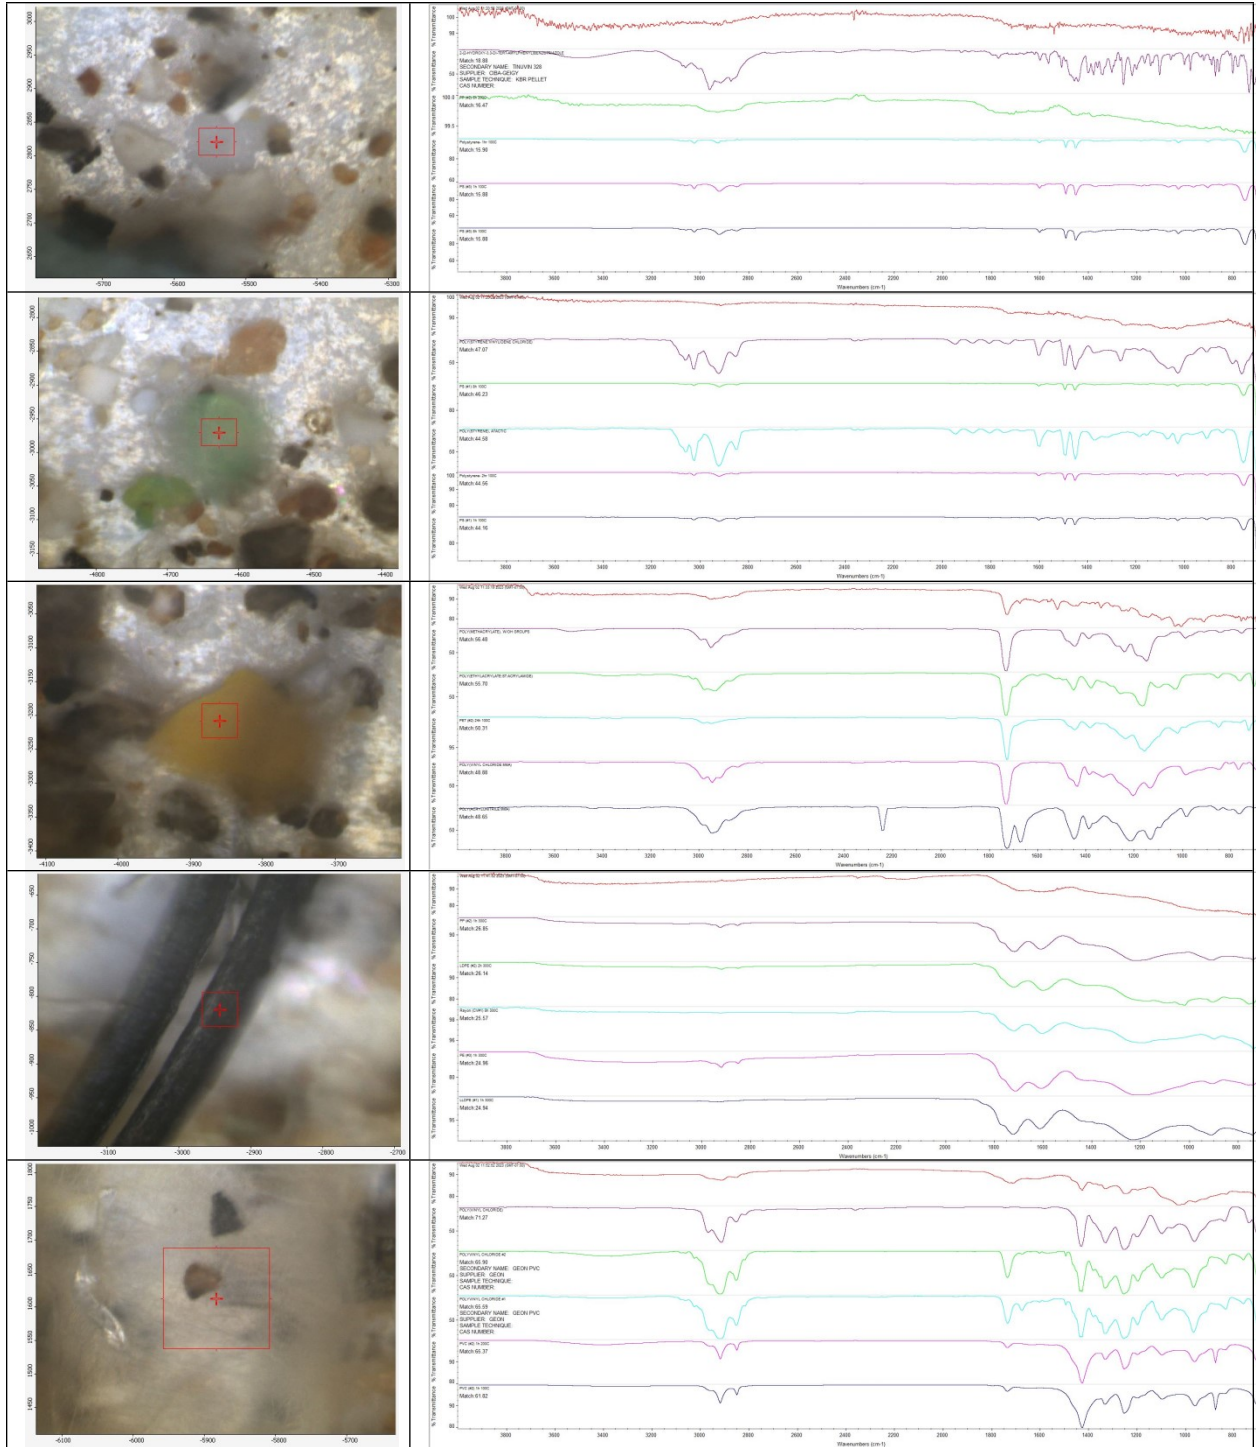

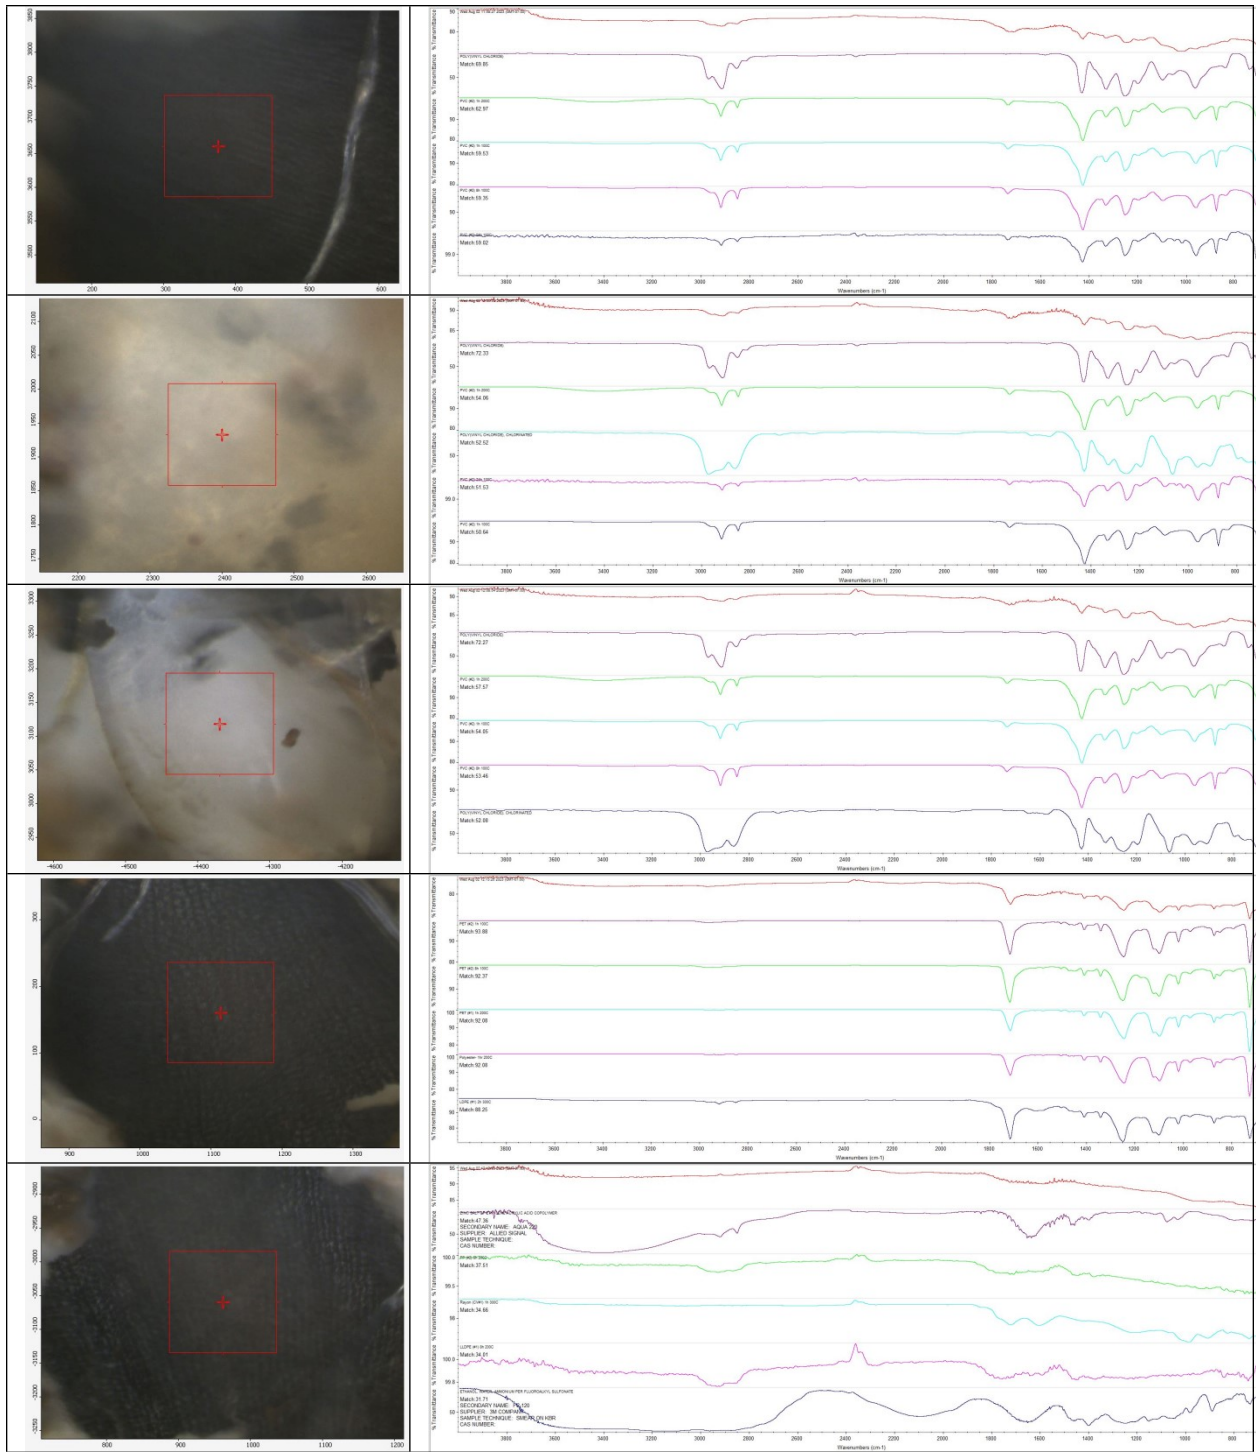



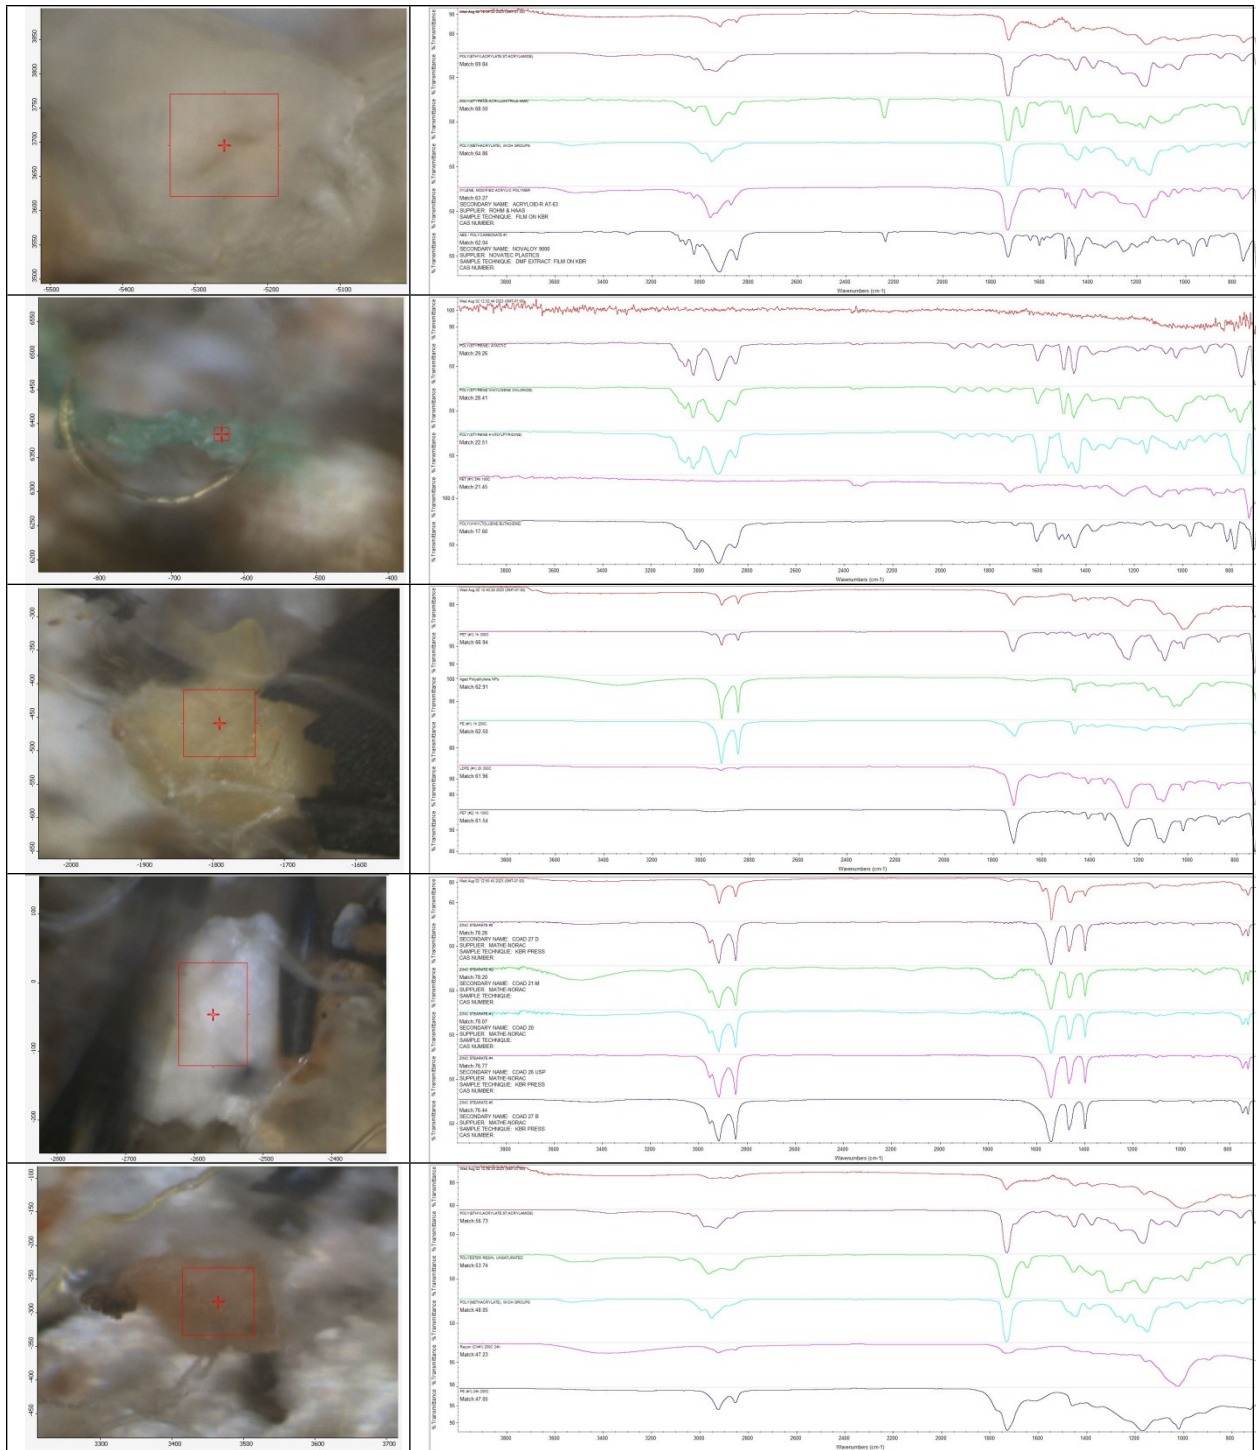

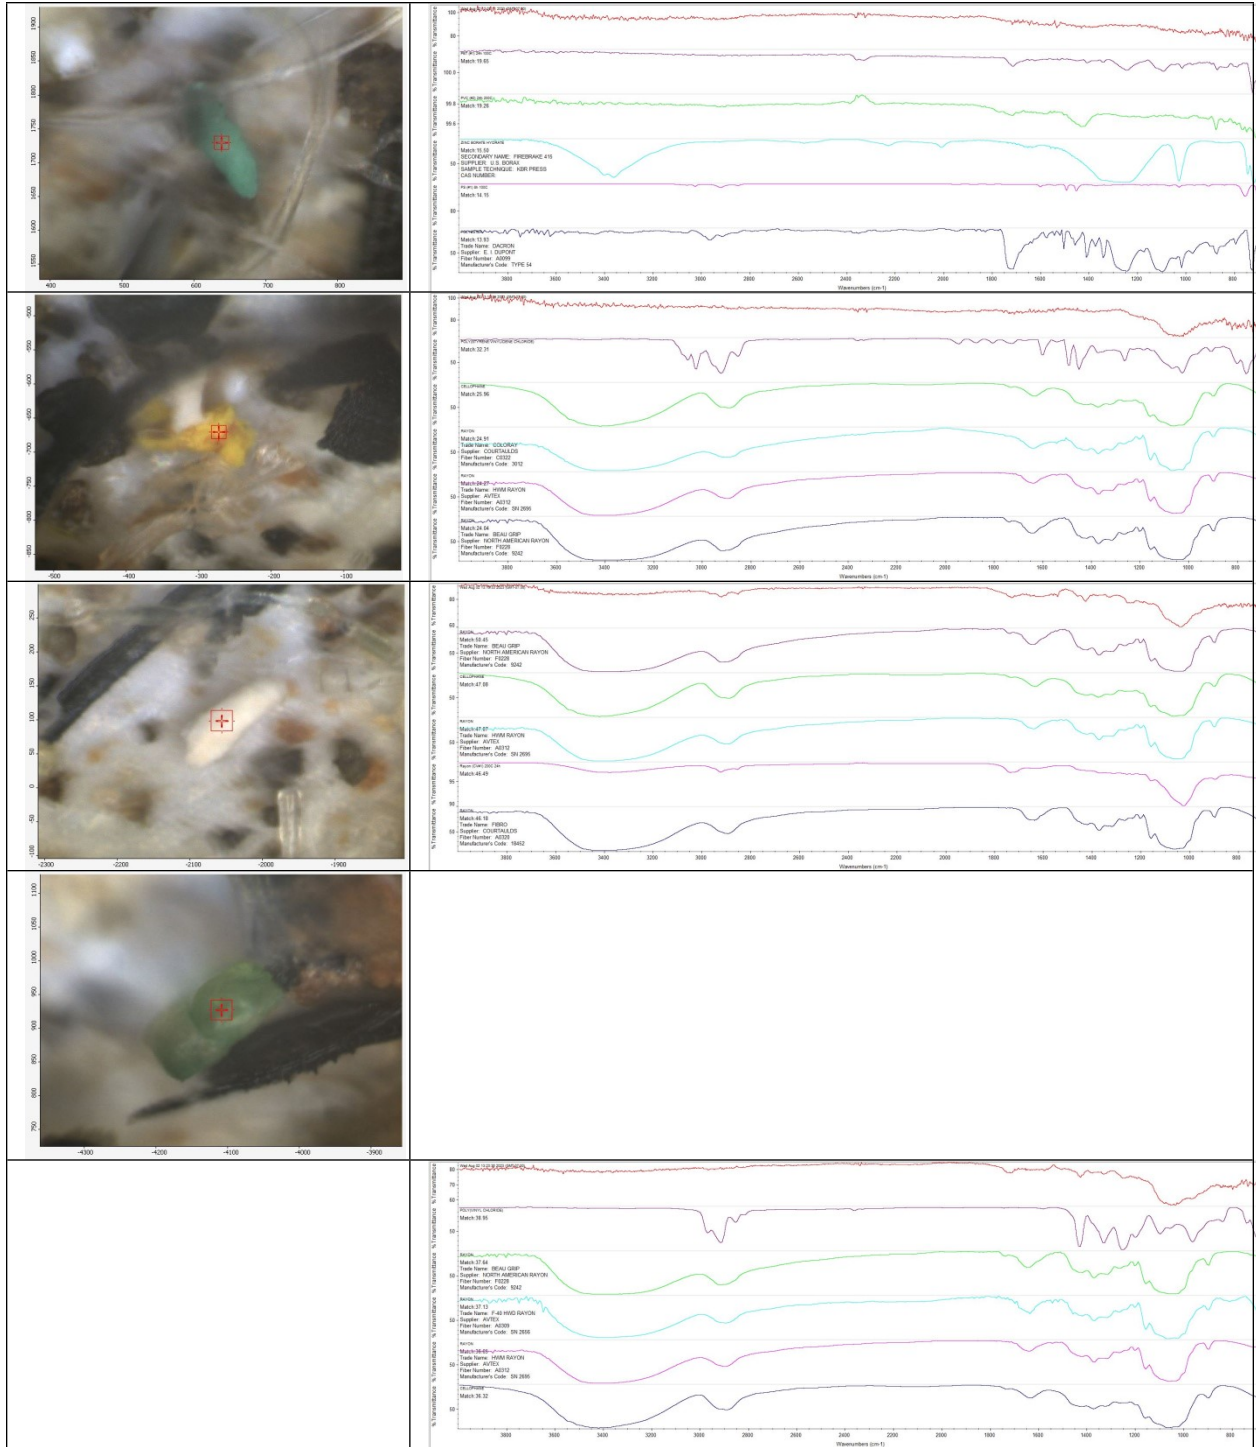

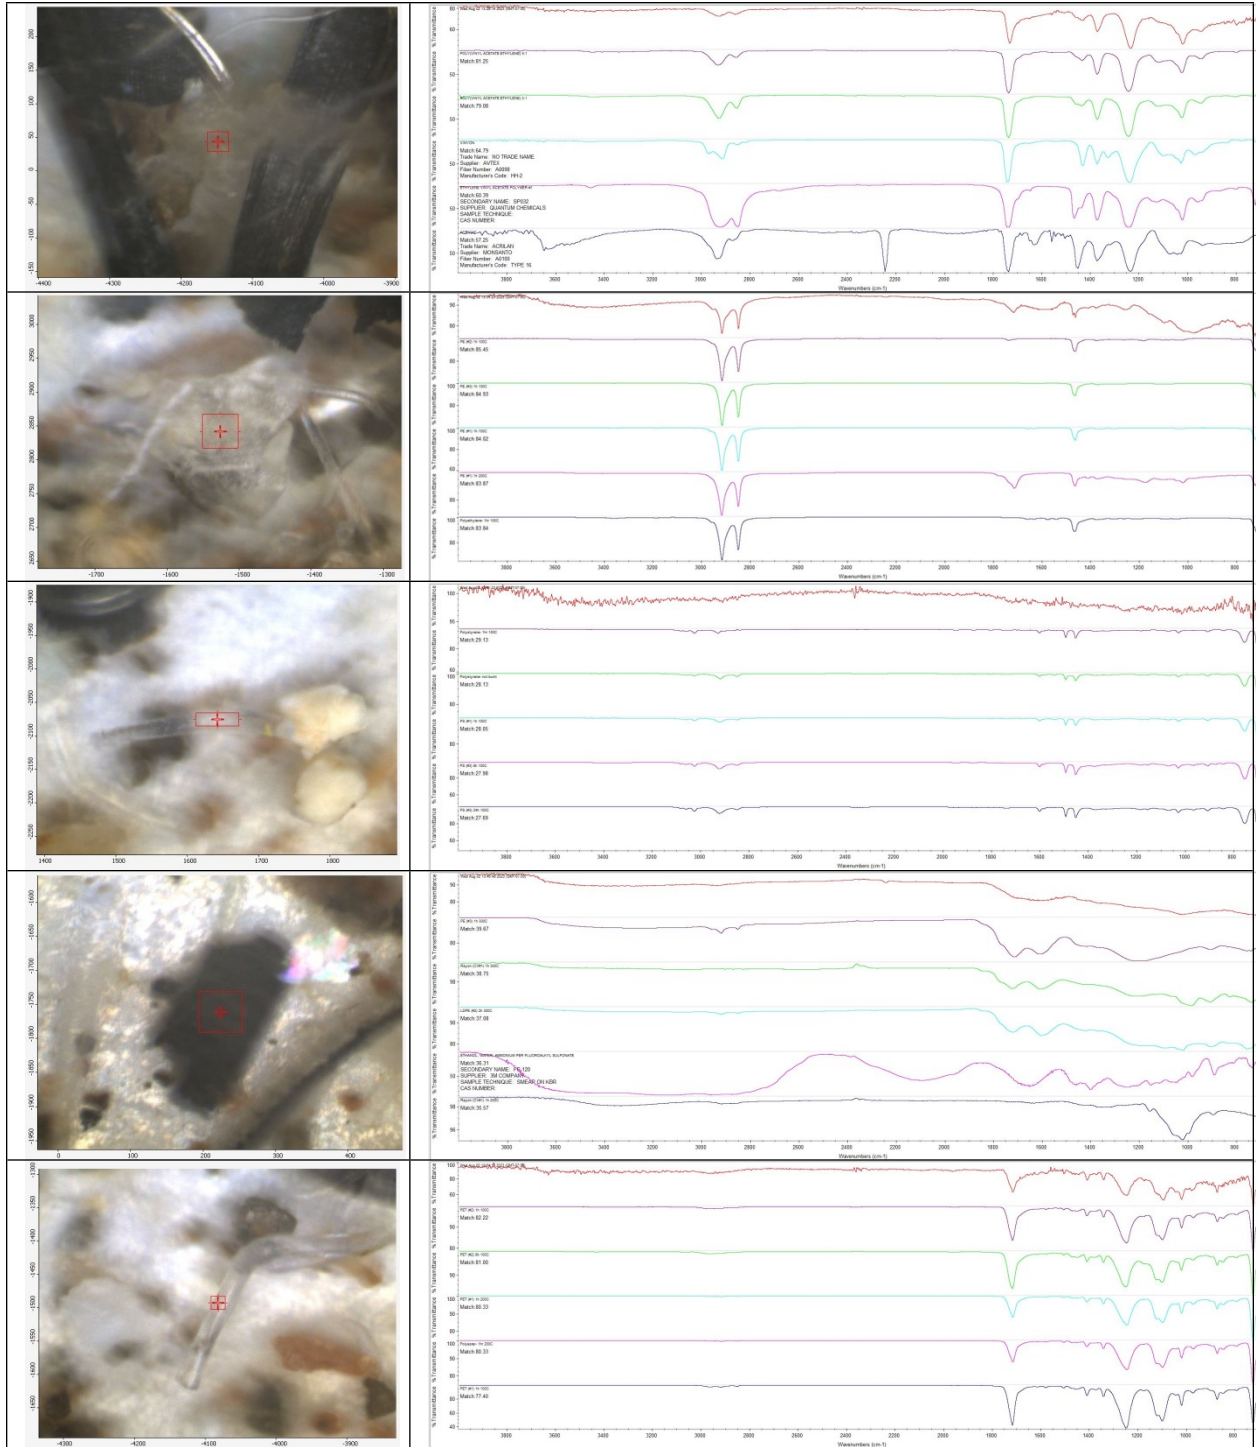

**Table S13: ATR-FTIR spectra, Applied Biosolids 2, Sieving**

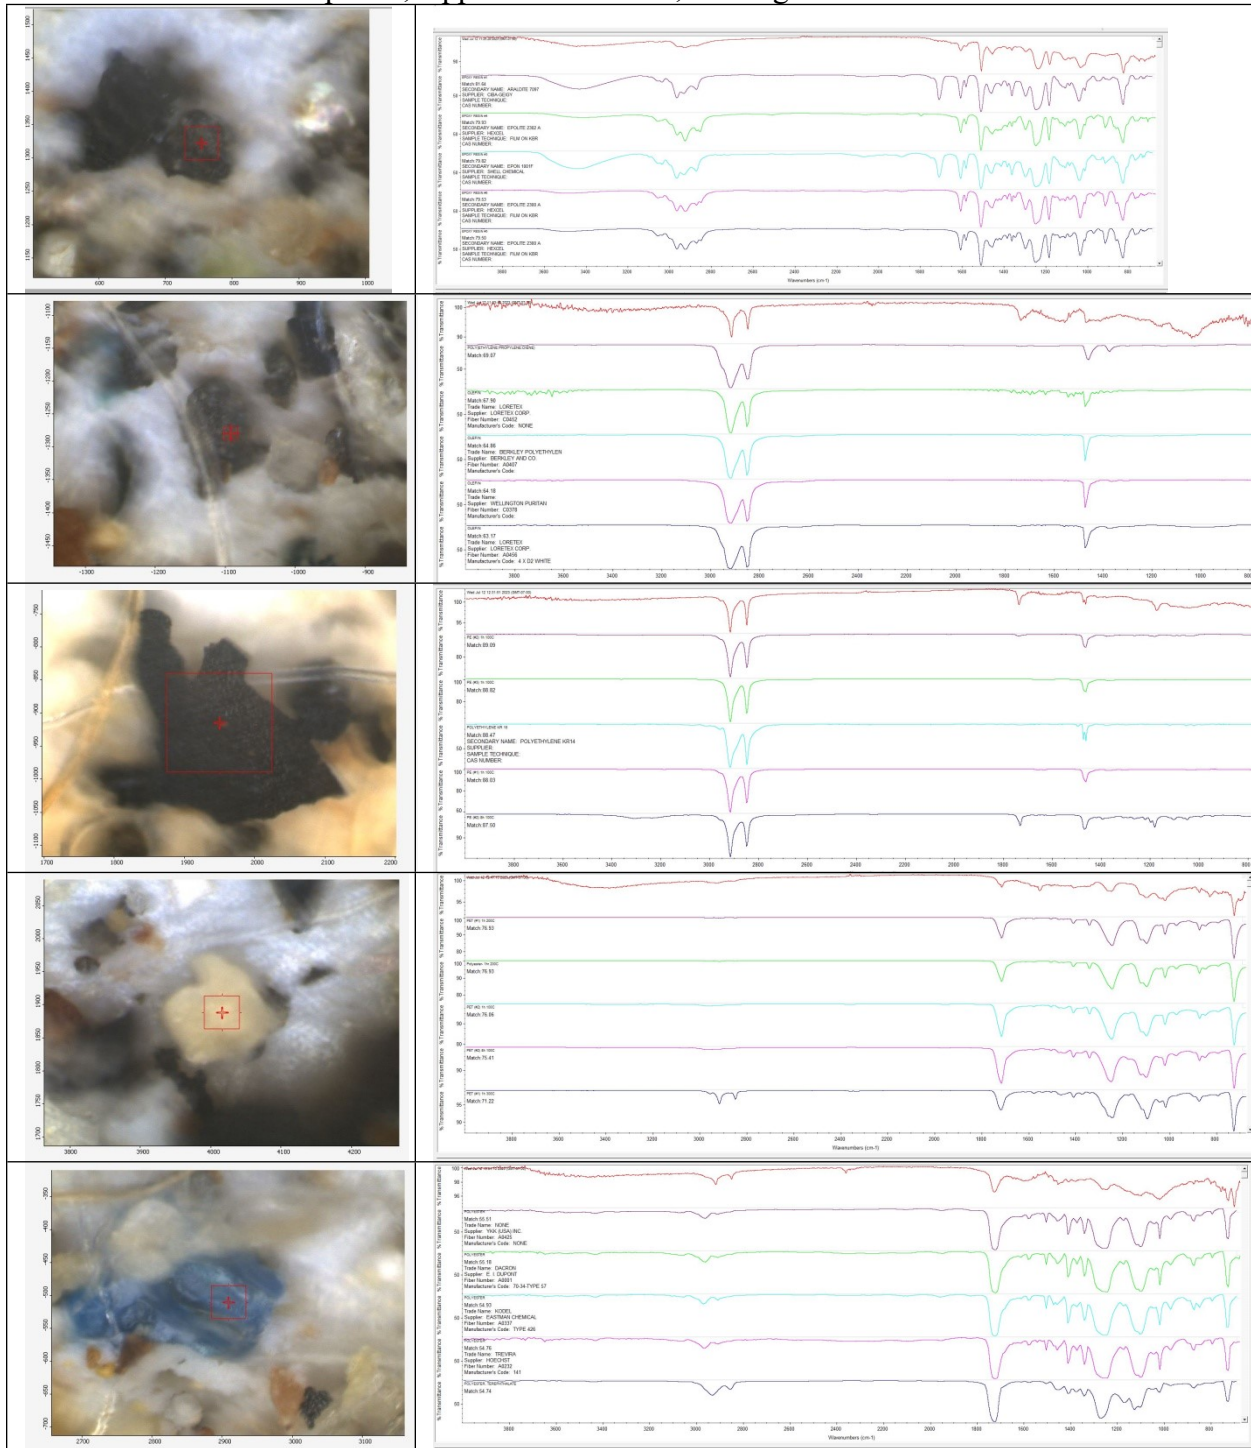

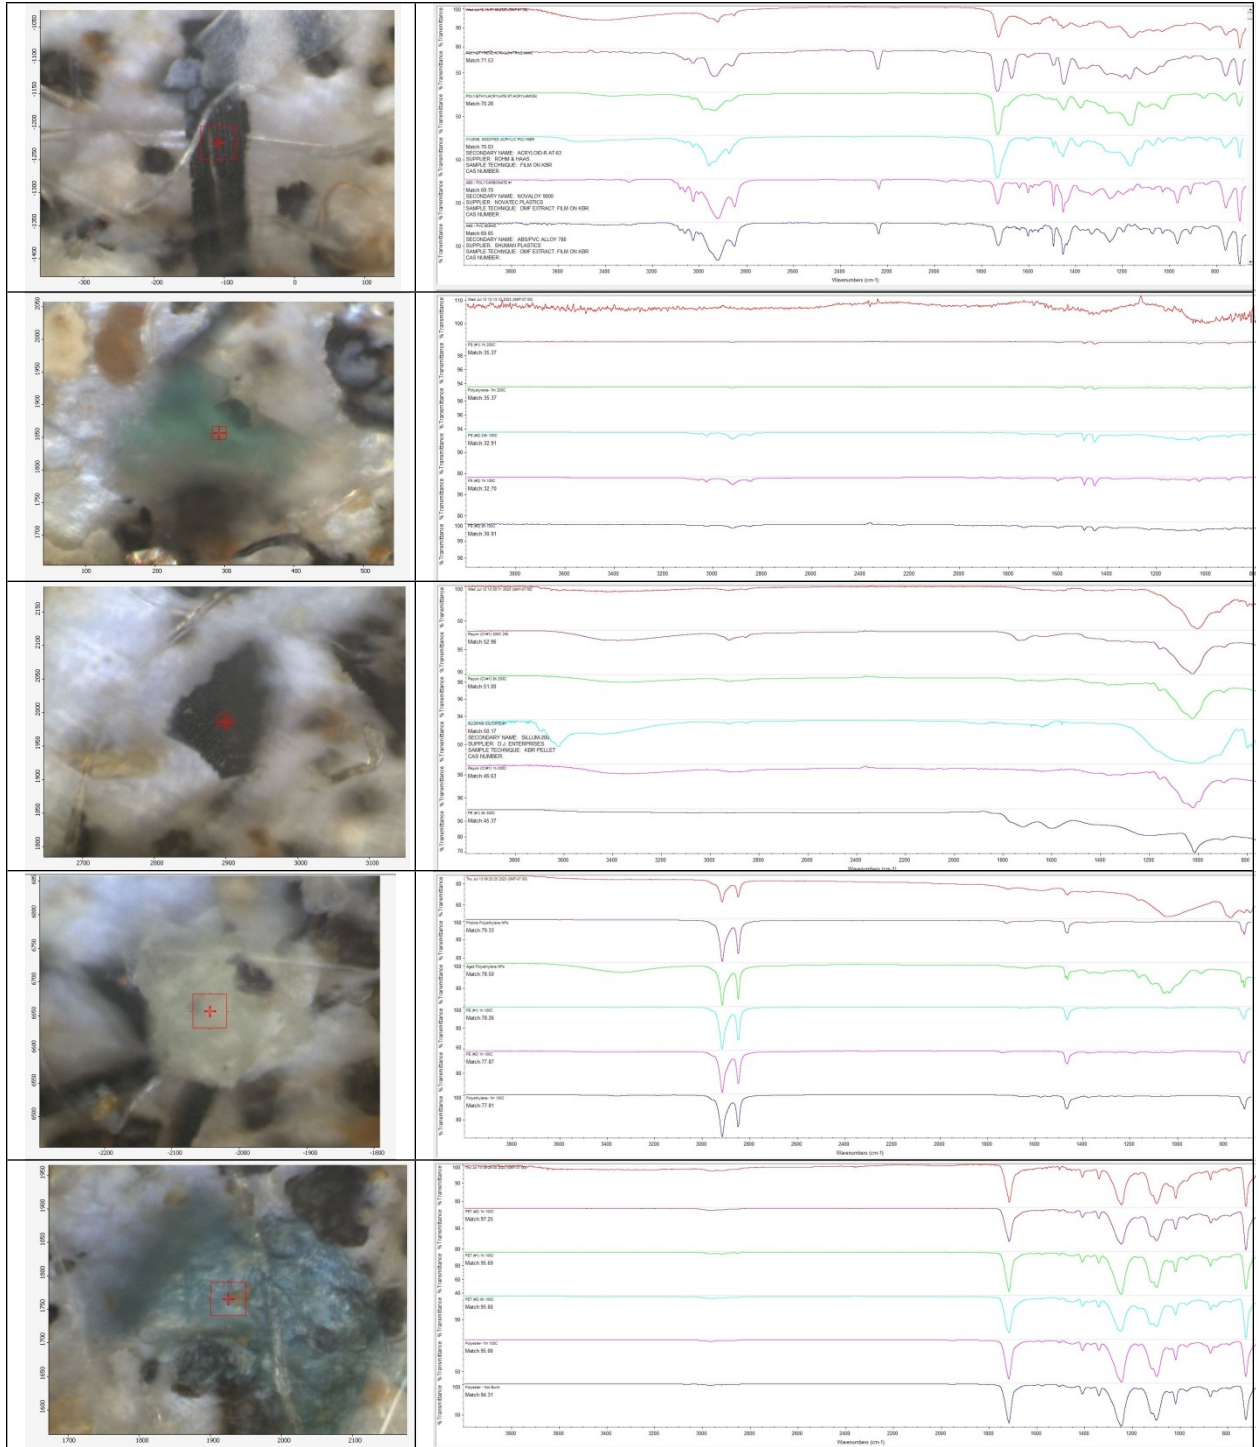

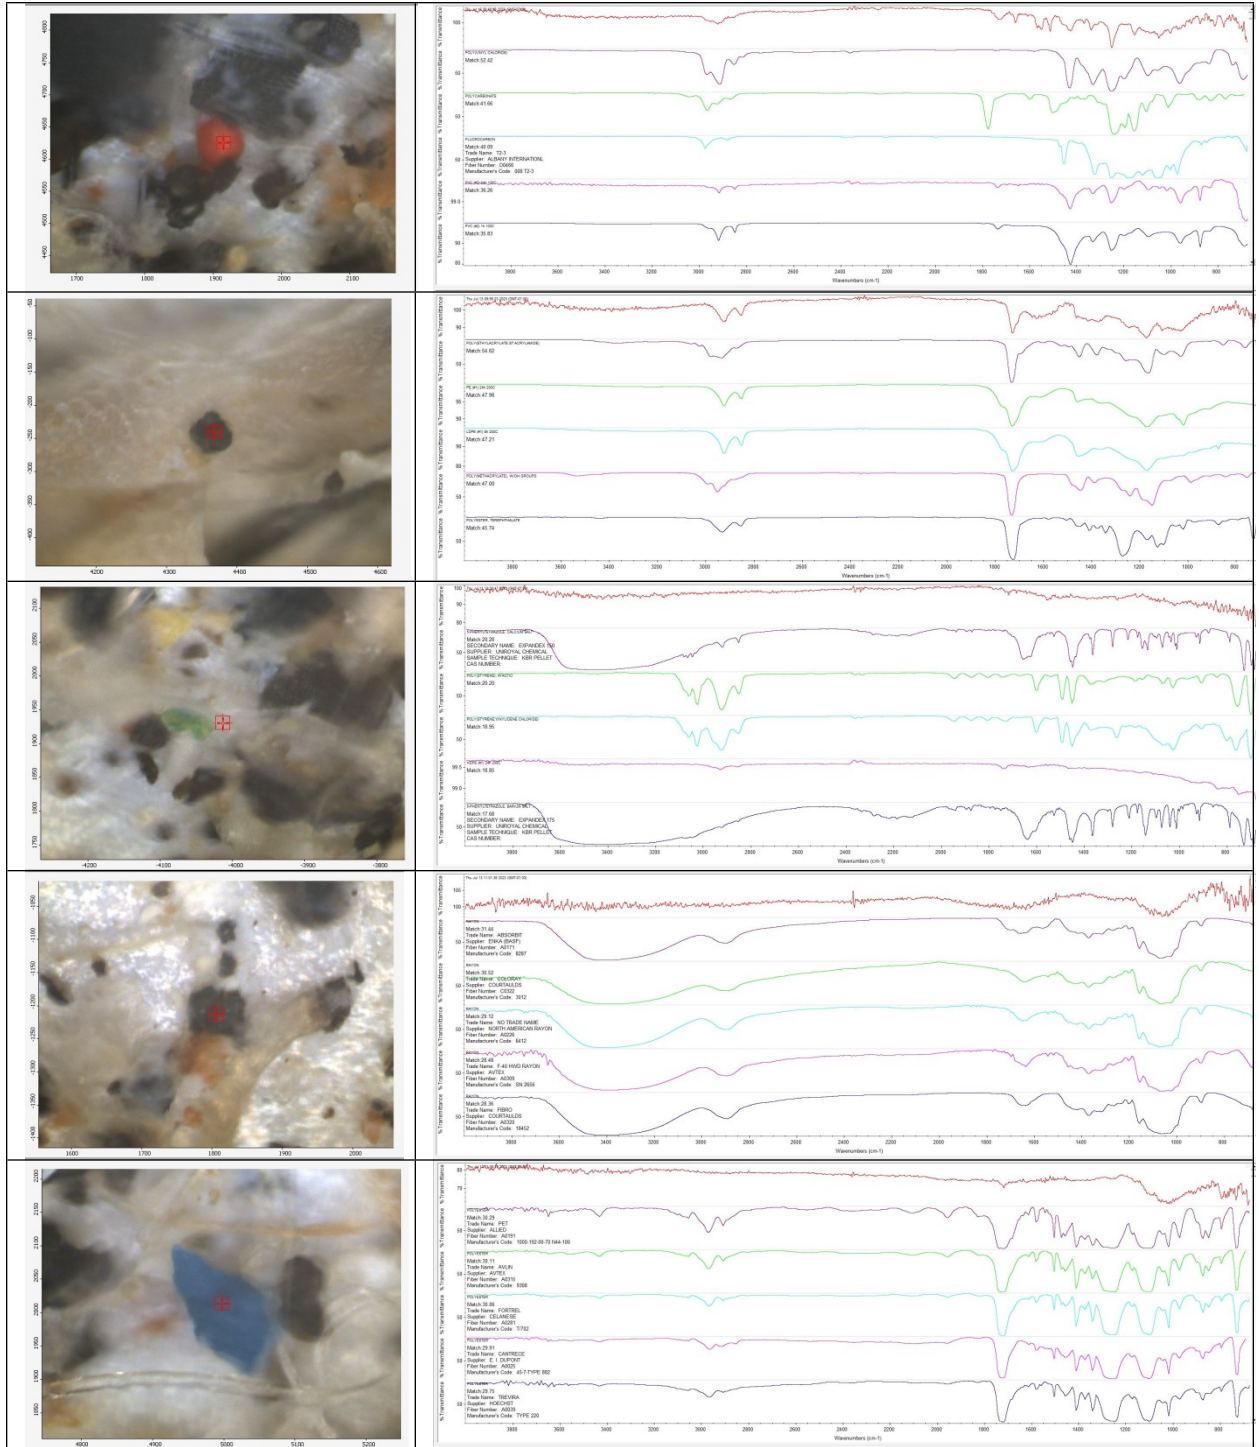

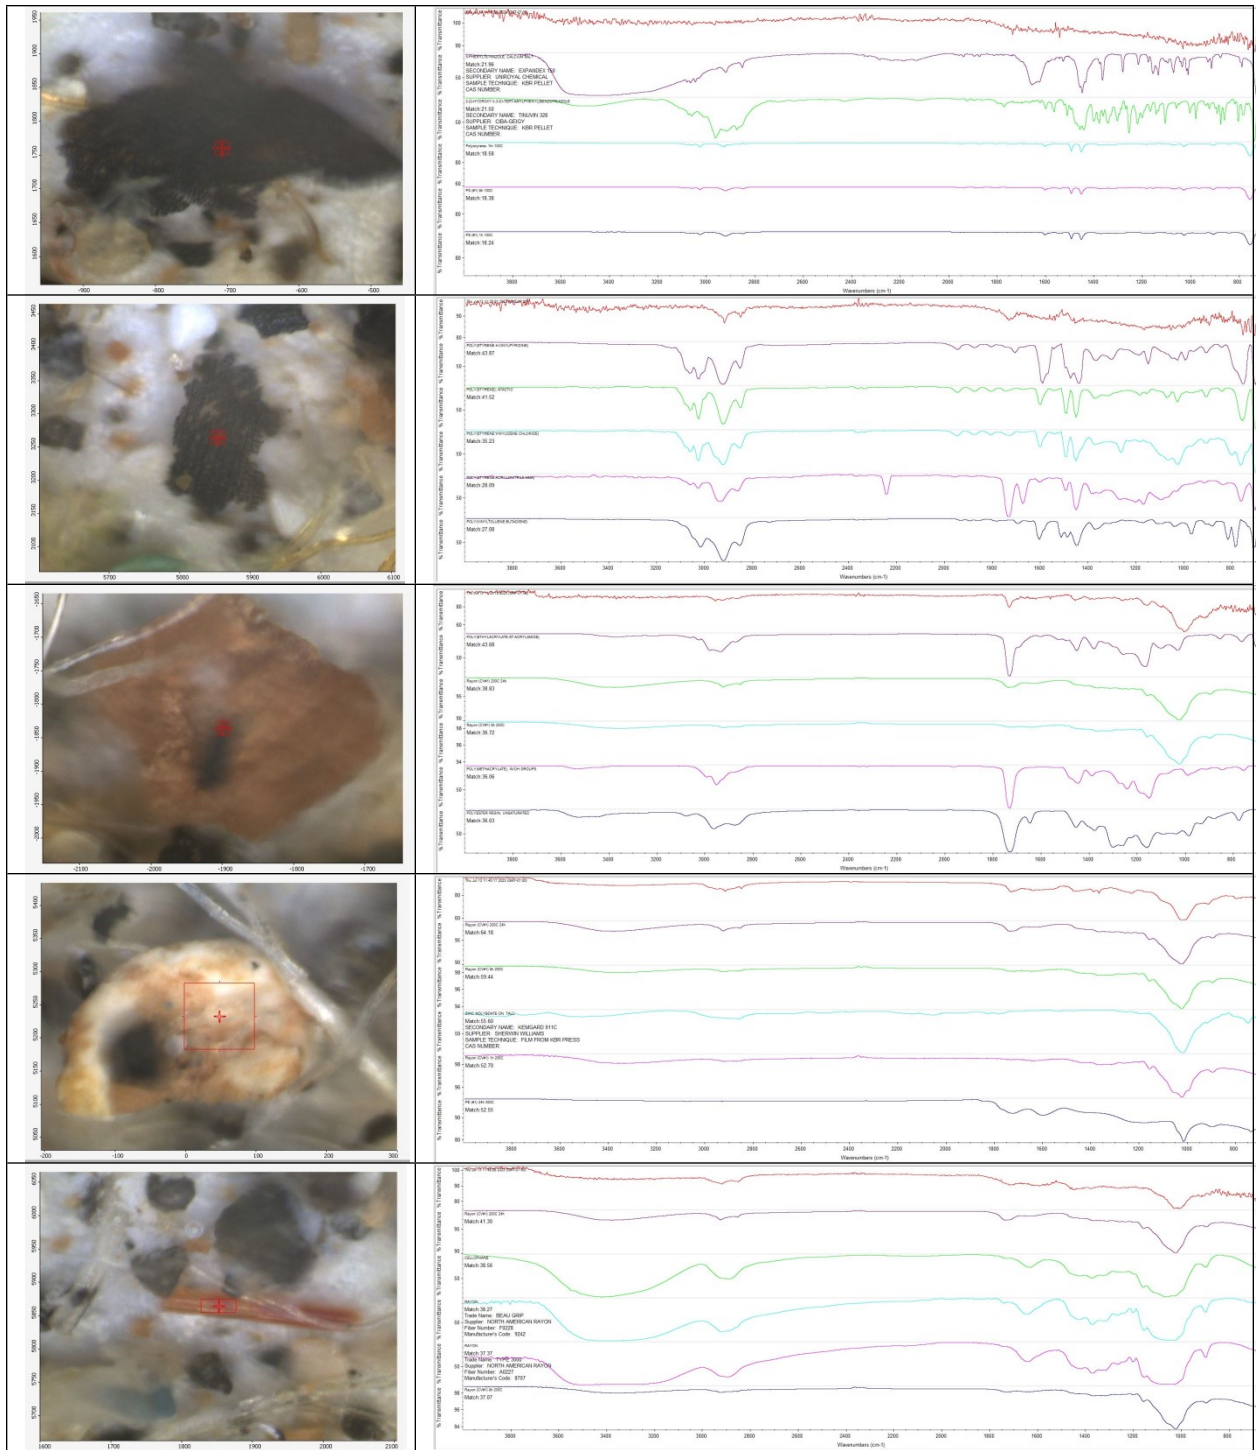

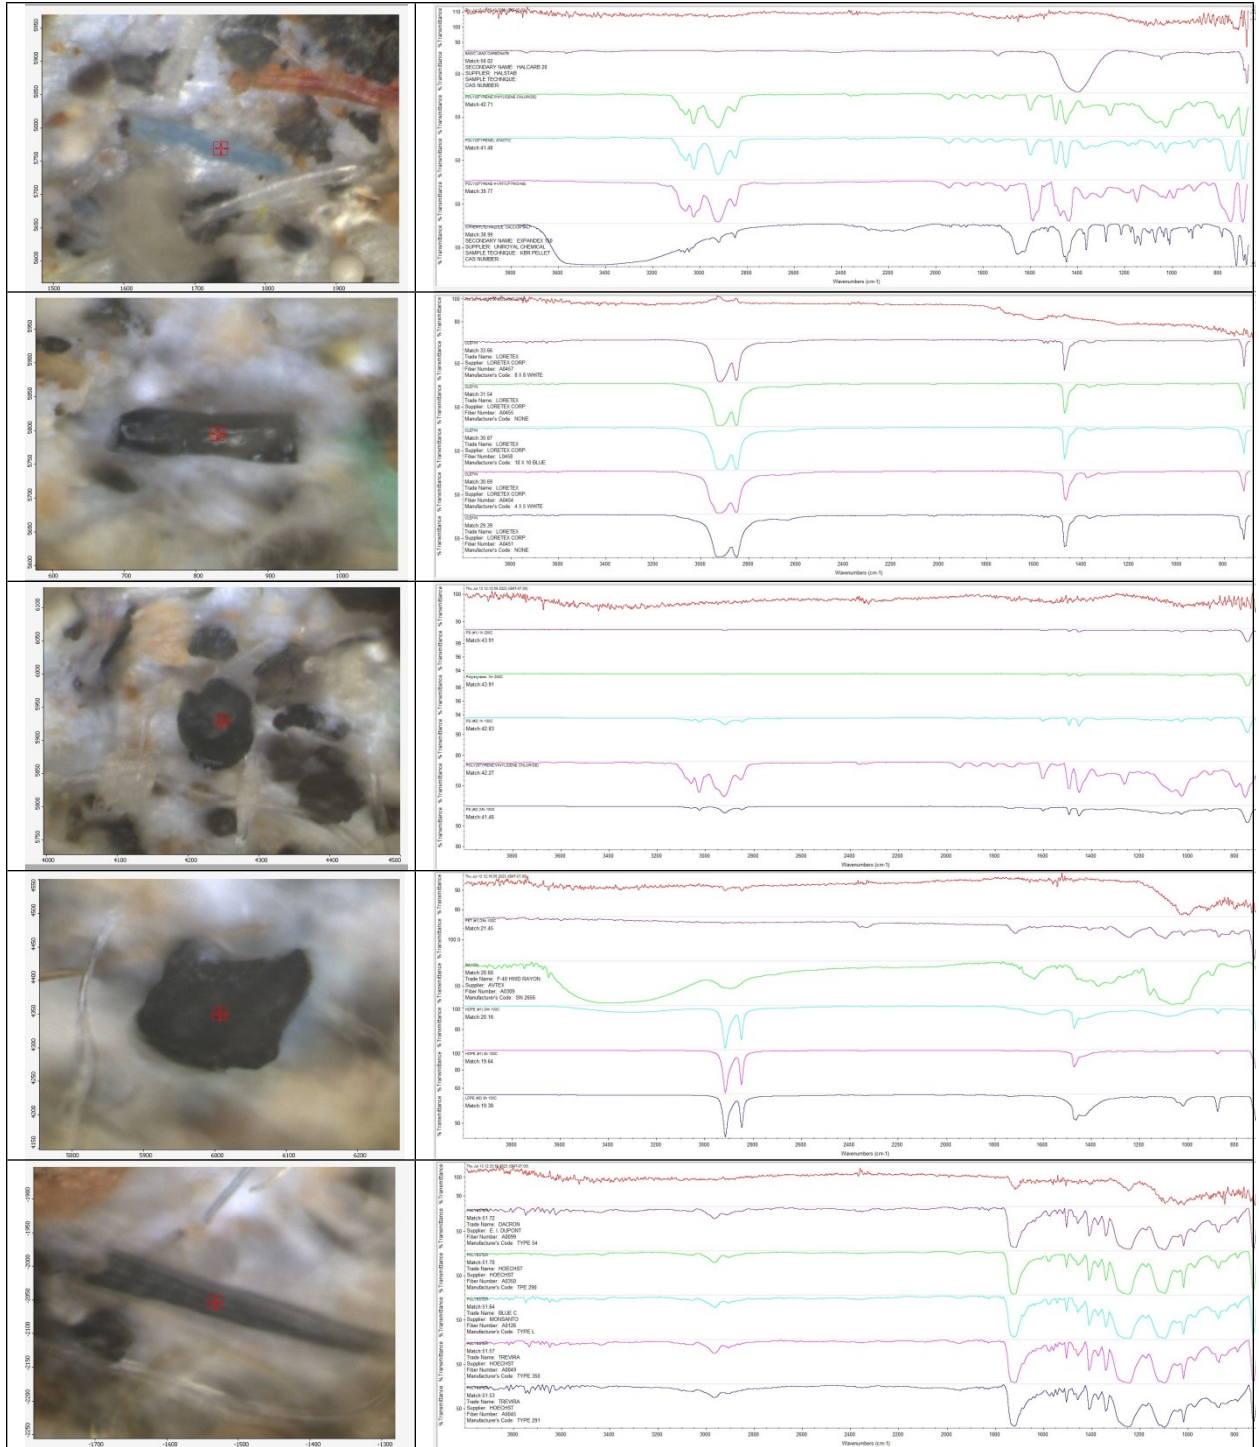



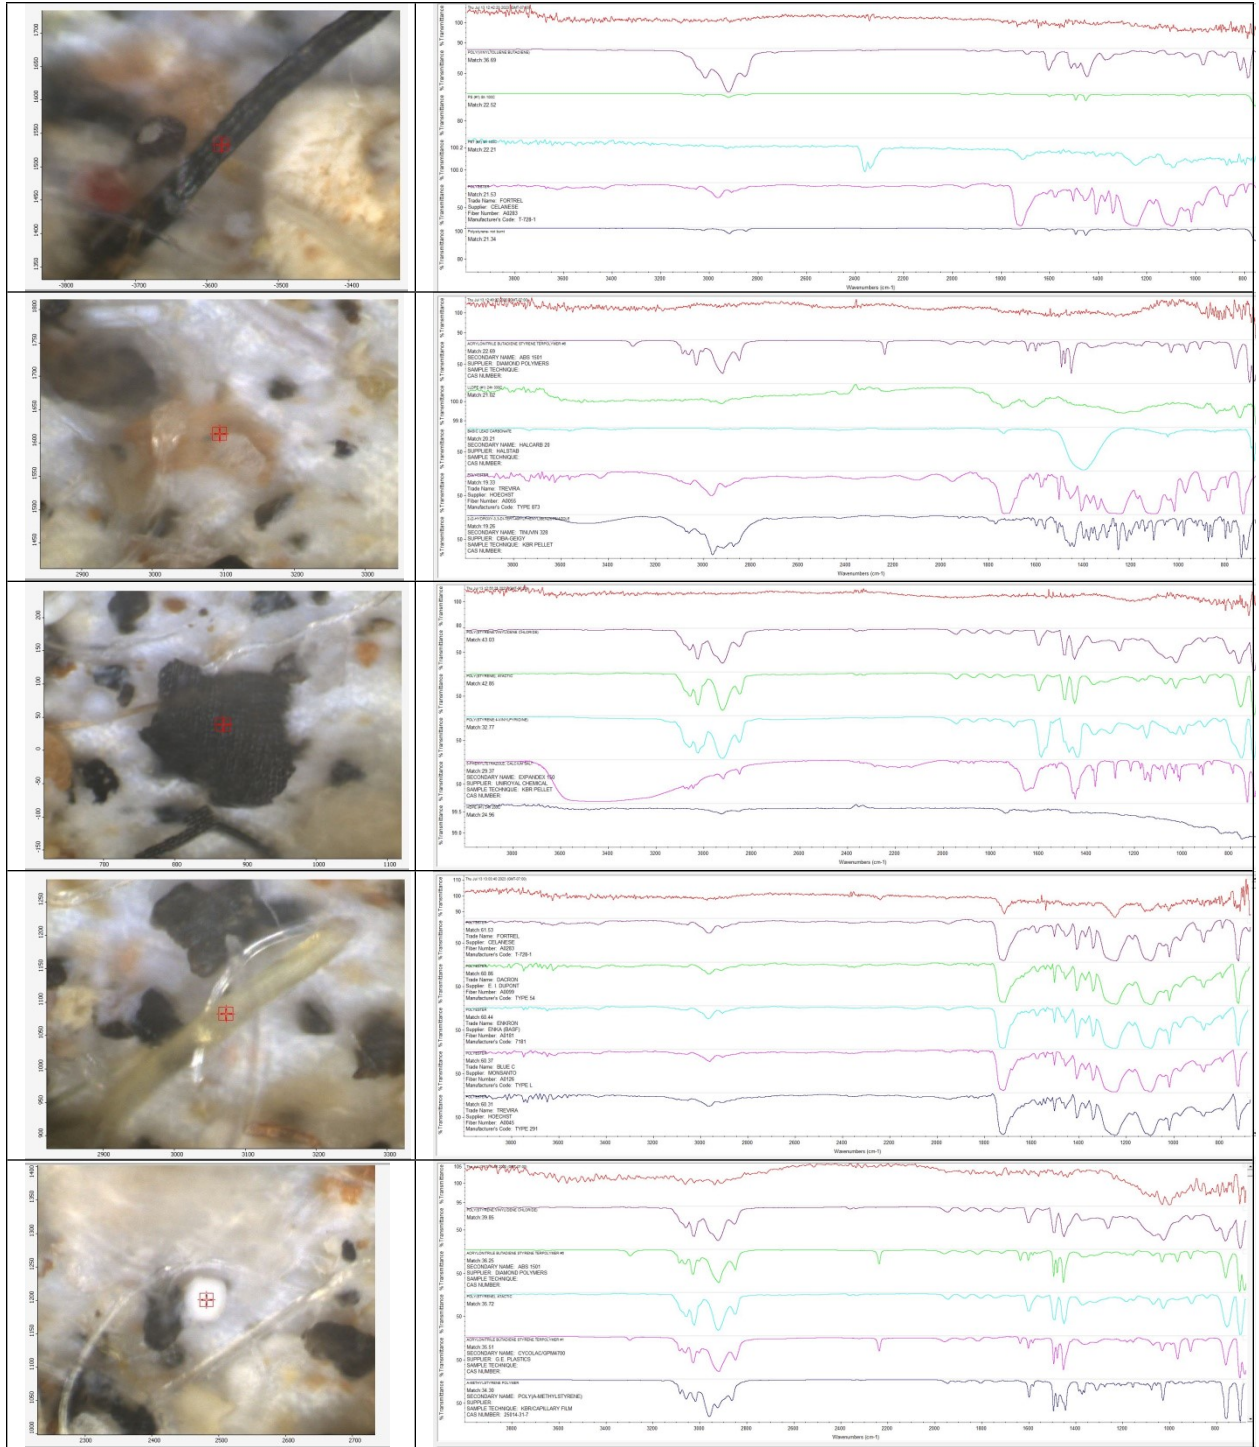

**Table S14: ATR-FTIR spectra, Applied Biosolids 2, Elutriation**

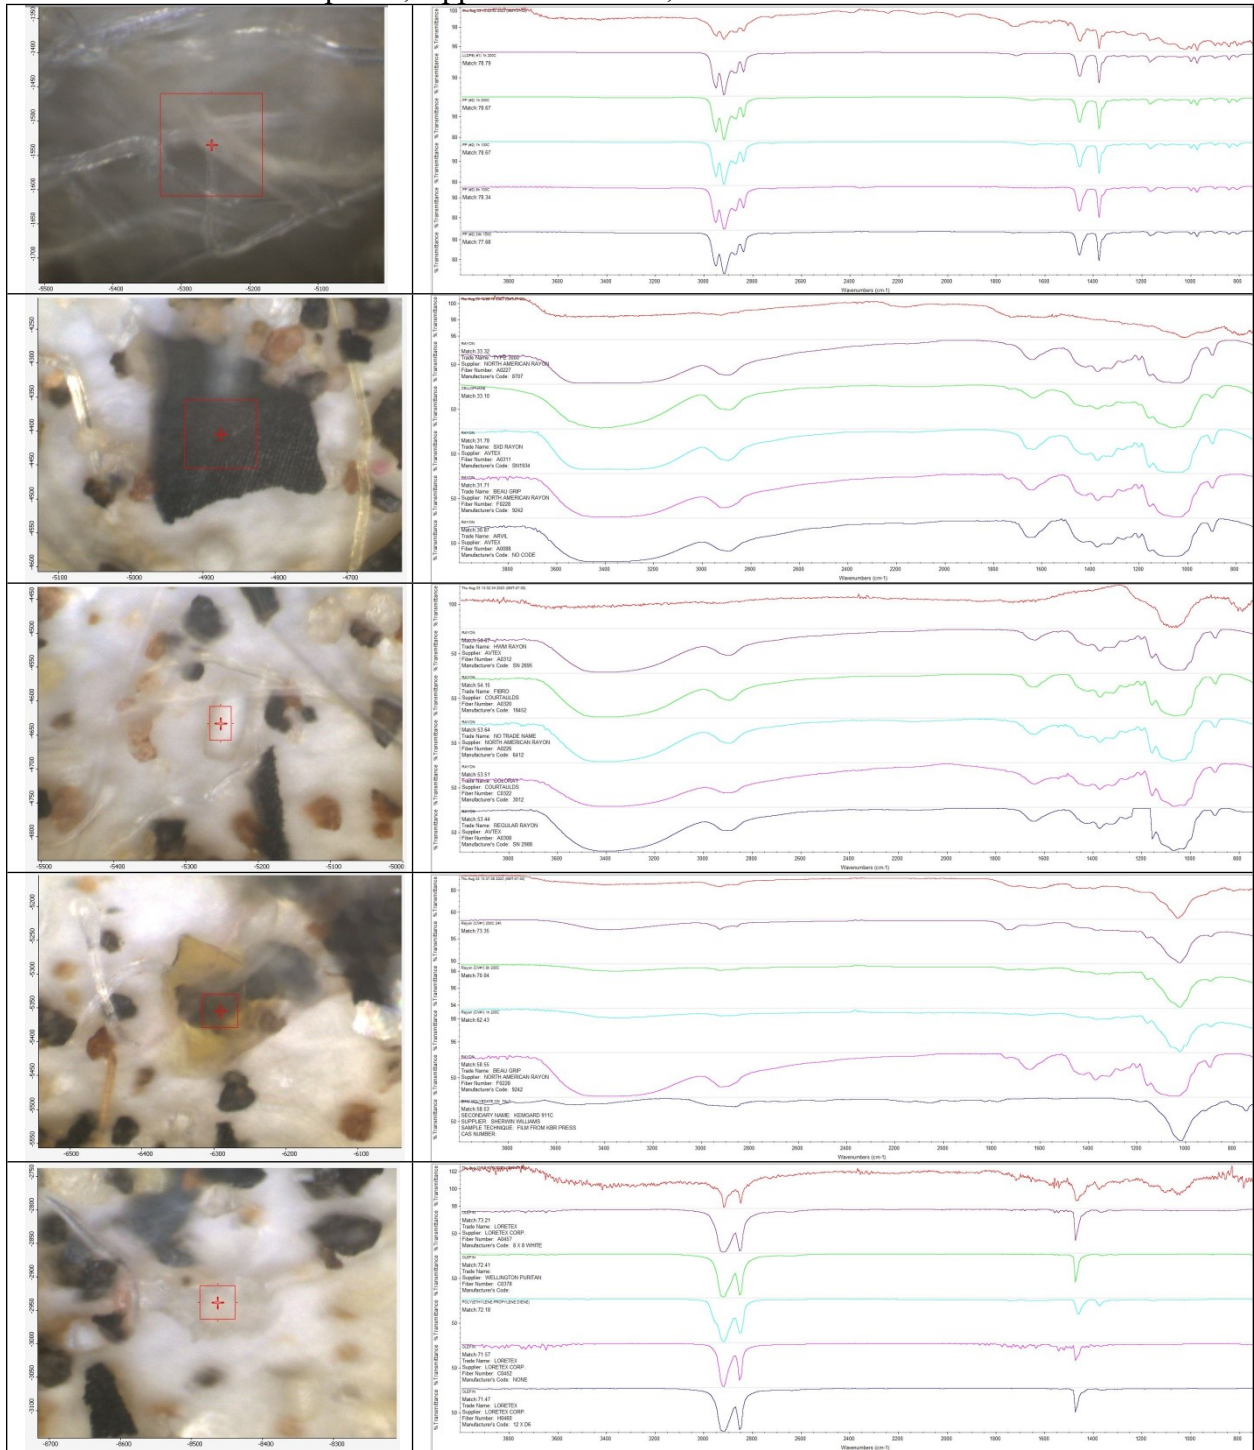

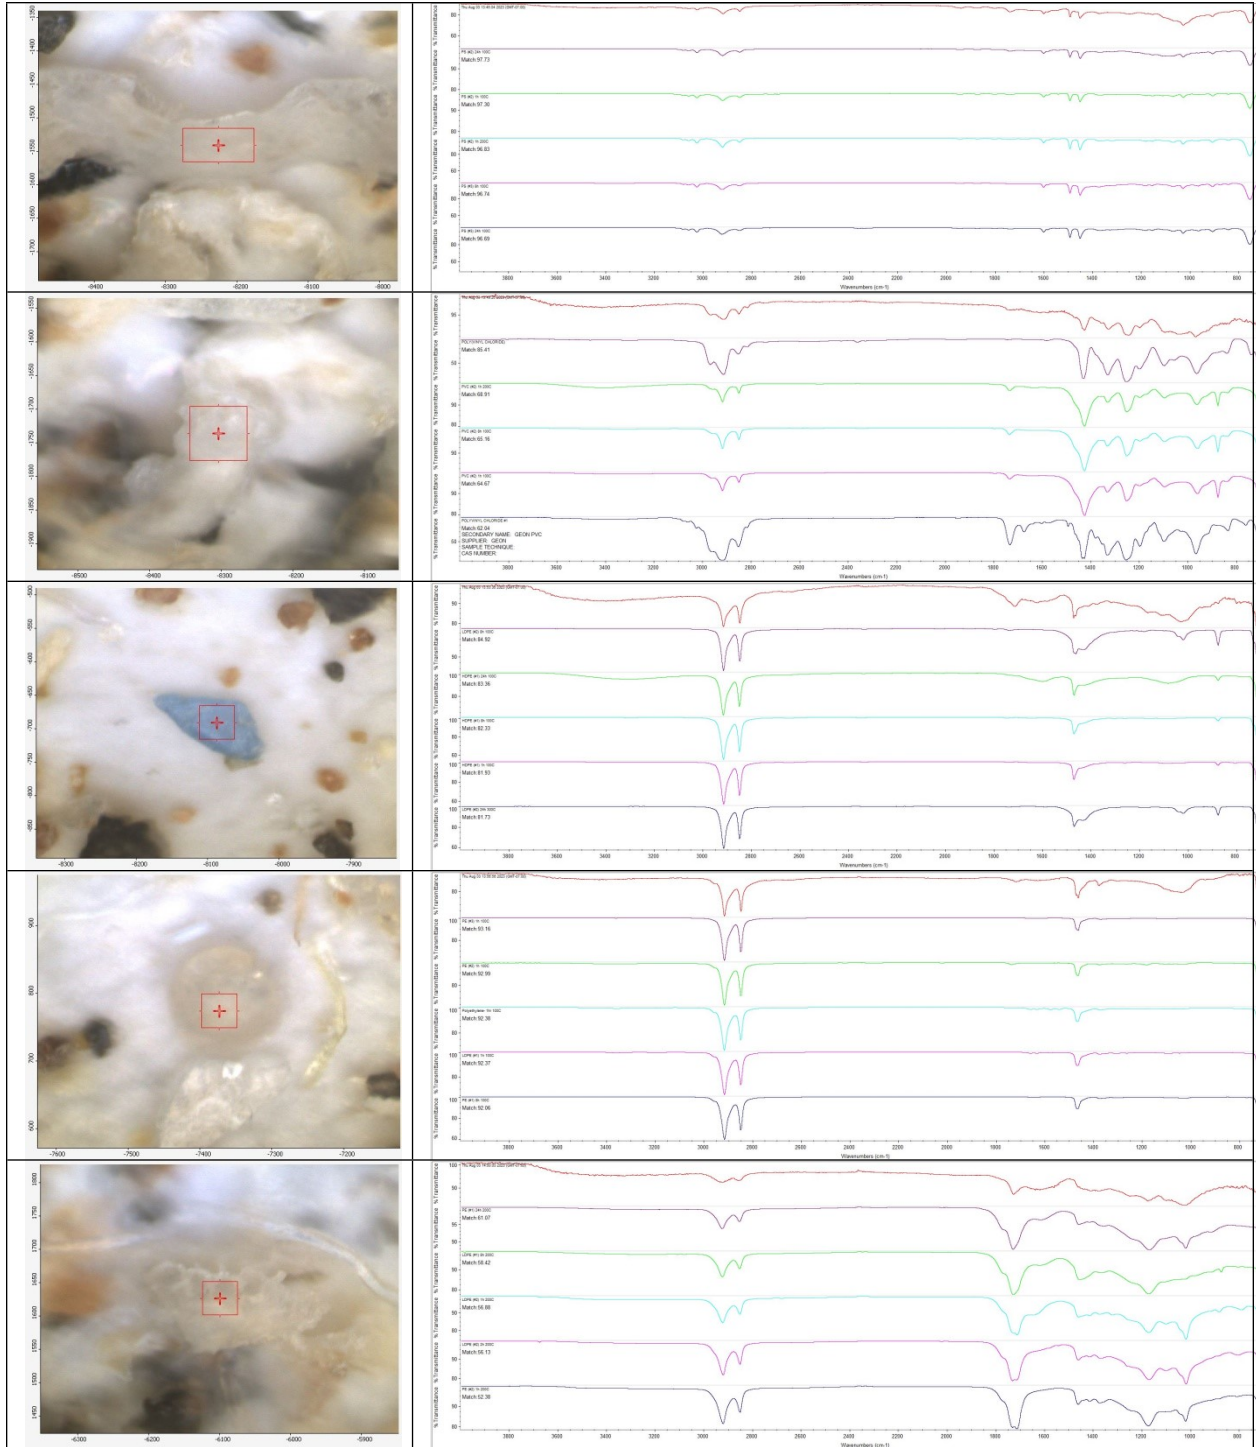

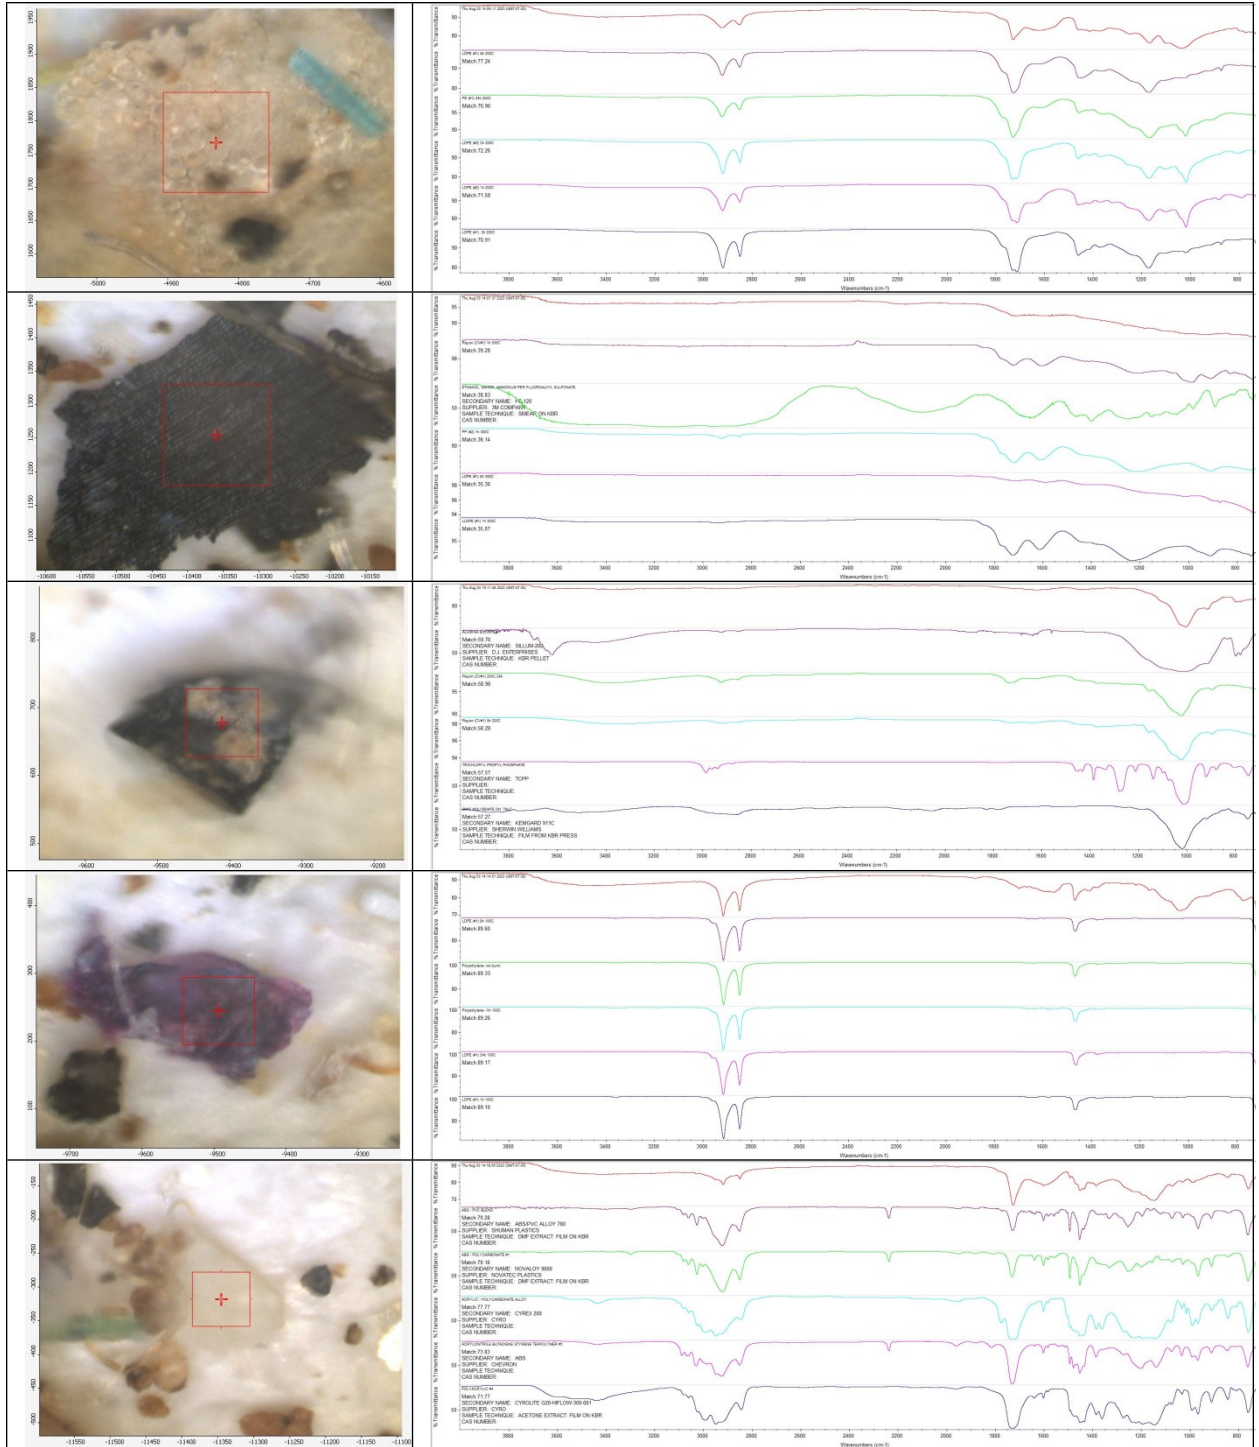

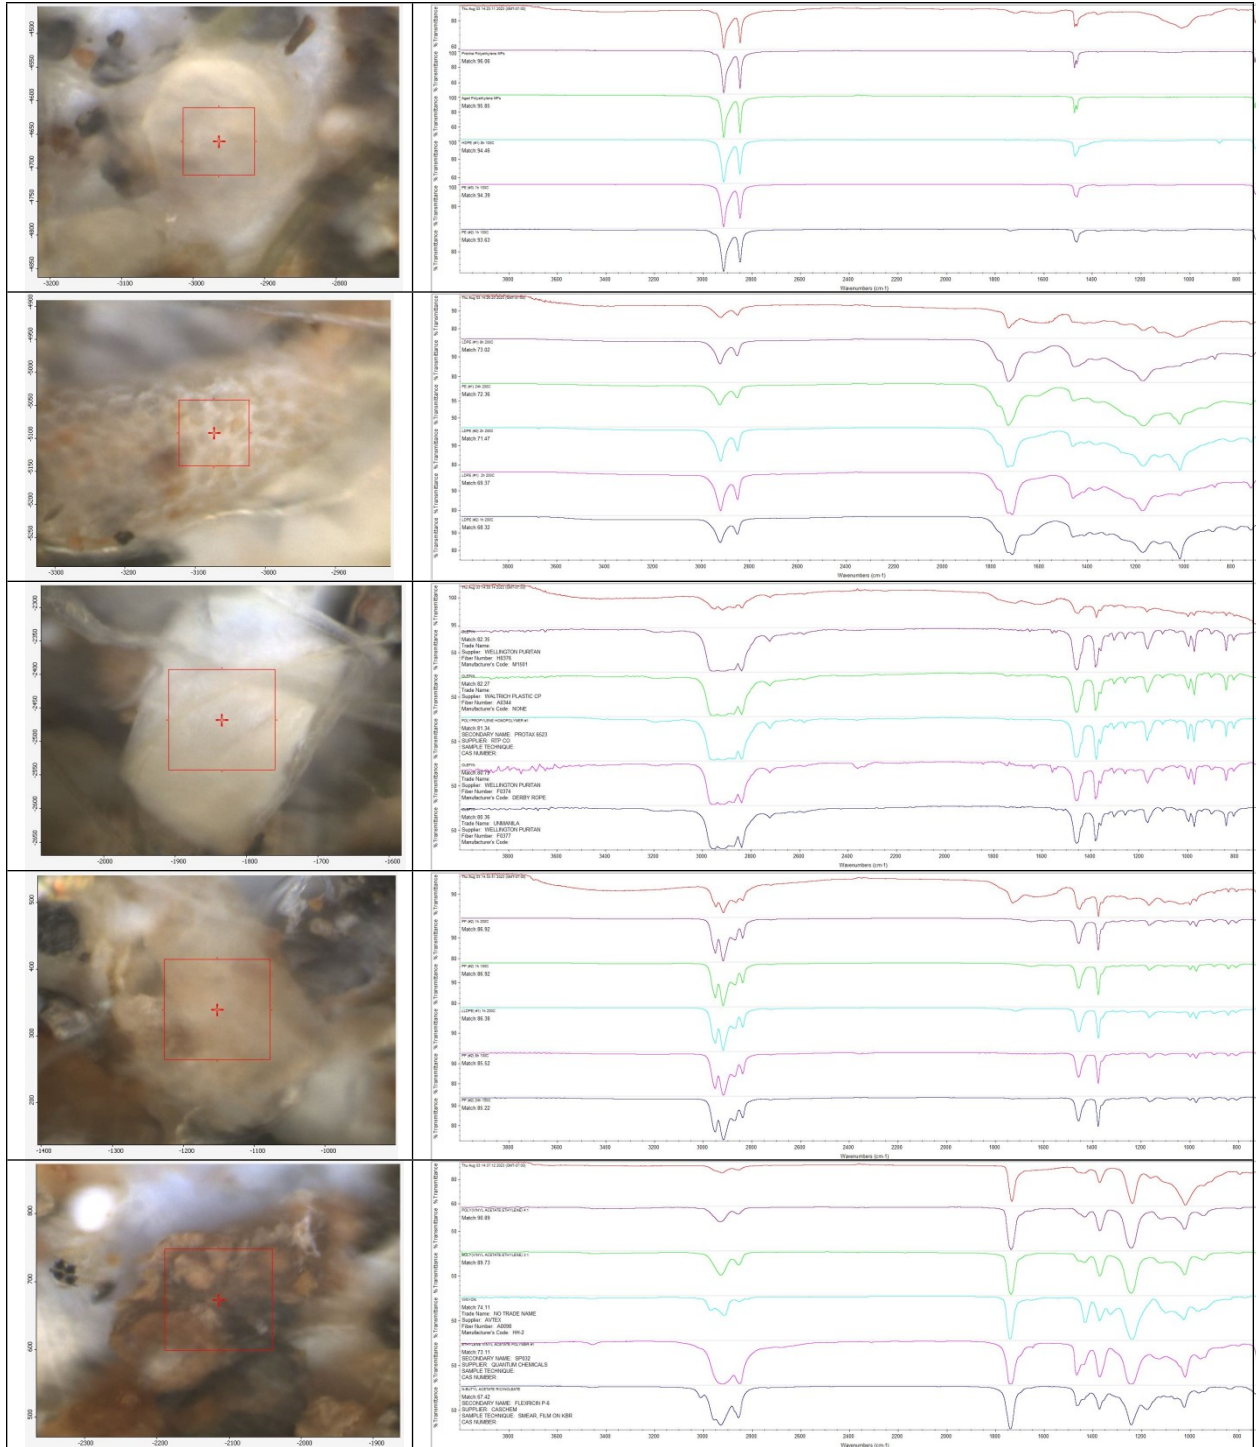

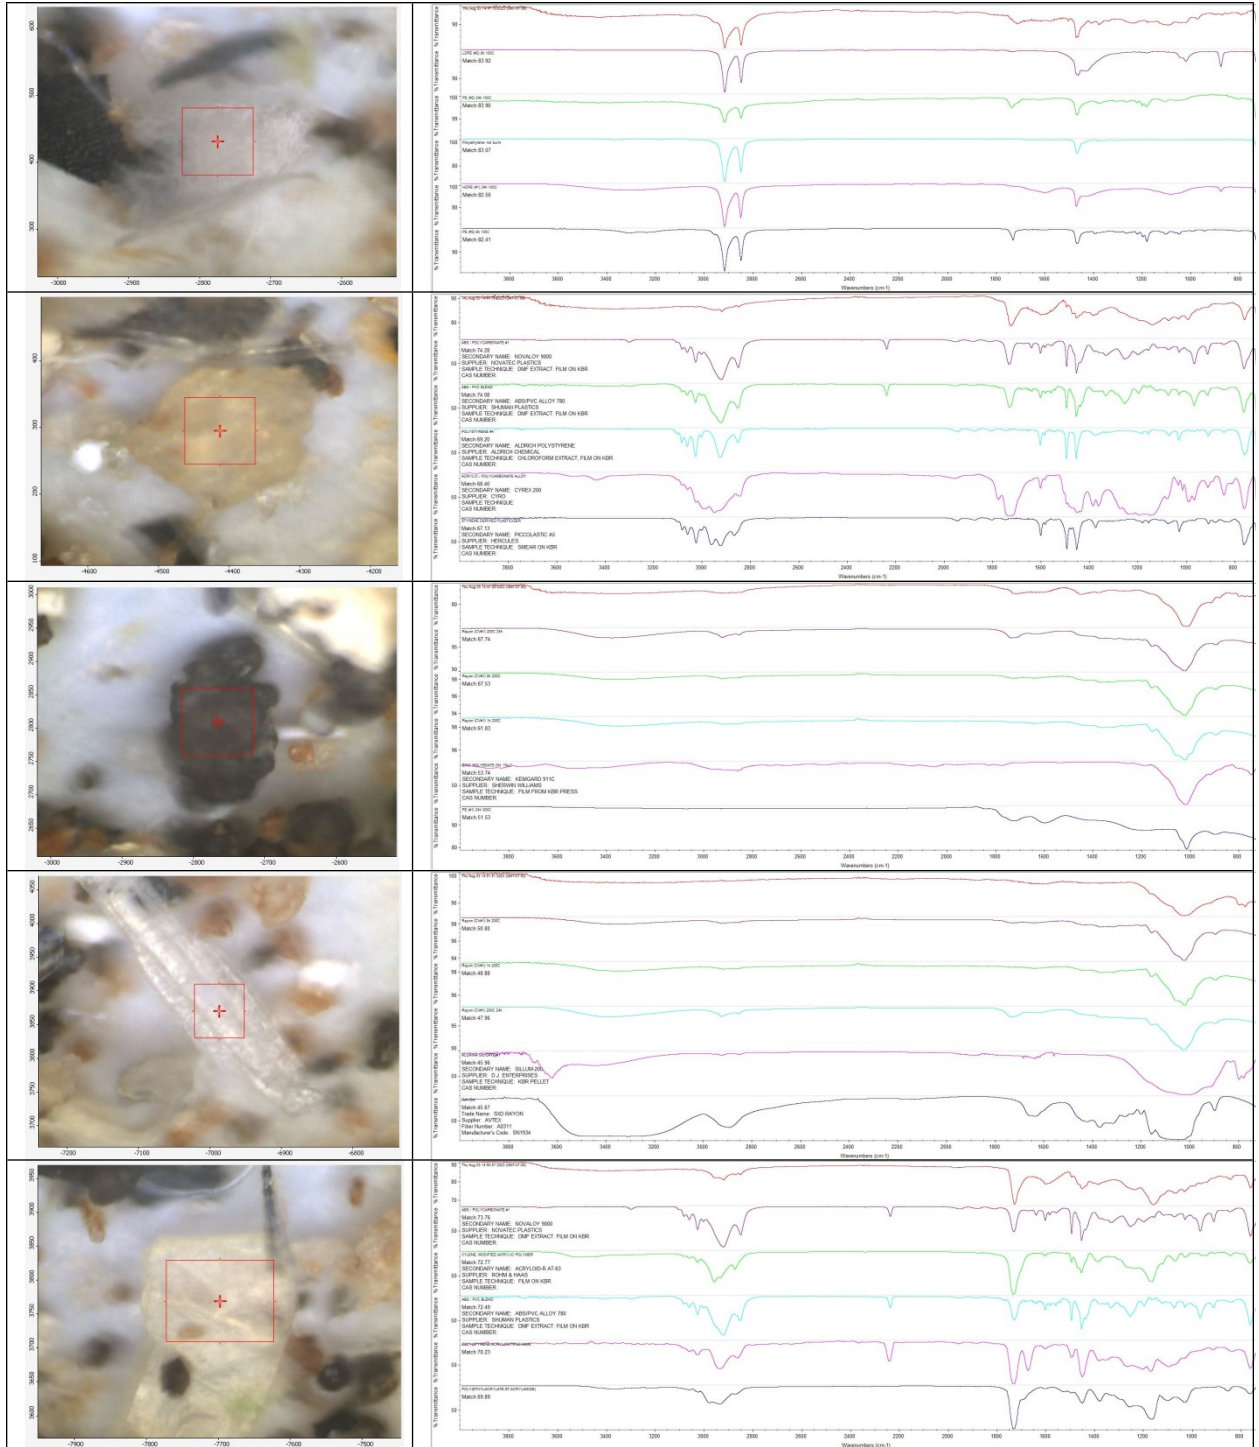

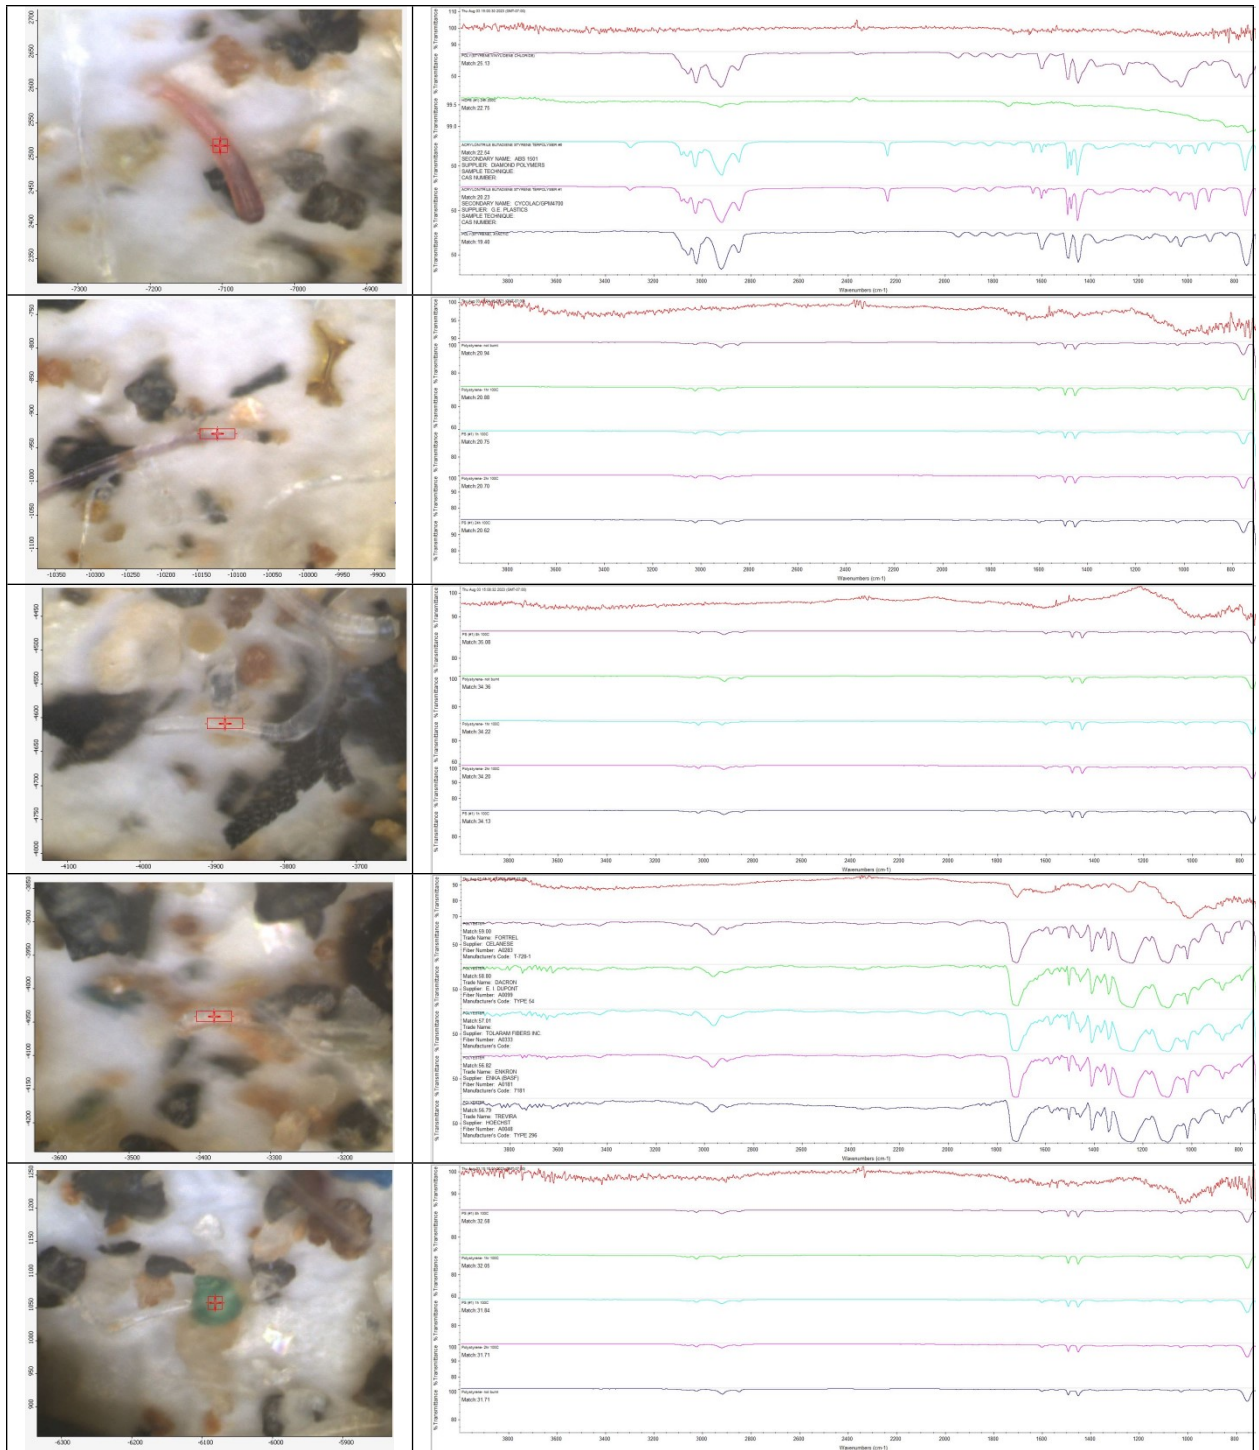

**Table S15: FTIR-ATR matches for control (blank) sample**

| Control, Sieving + Digestion + Flotation |                     |                | Control, Elutriation + Digestion + Flotation |                              |                |
|------------------------------------------|---------------------|----------------|----------------------------------------------|------------------------------|----------------|
| Point                                    | ID                  | Best Match (%) | Point                                        | ID                           | Best Match (%) |
| 1                                        |                     |                | 1                                            | Olefin                       | 51.41          |
| 2                                        | TiO2(98%)/Al2O3(2%) | 51.09          | 2                                            | Rayon                        | 67.11          |
| 3                                        | Rayon               | 74.93          | 3                                            | Rayon                        | 26.16          |
| 4                                        |                     |                | 4                                            | Rayon                        | 50.38          |
| 5                                        | PS 8h 100C          | 35.24          | 5                                            | Poly(vinyltoluene:butadiene) | 29.38          |

**Table S16: FTIR-ATR matches for Arkansas River 2 sample**

| Arkansas River 2, Sieving + Digestion + Flotation |                                            |                | Arkansas River 2, Elutriation + Digestion + Flotation |                      |                |
|---------------------------------------------------|--------------------------------------------|----------------|-------------------------------------------------------|----------------------|----------------|
| Point                                             | ID                                         | Best Match (%) | Point                                                 | ID                   | Best Match (%) |
| 1                                                 | PS, atactic                                | 46.51          | 1                                                     | Basic lead carbonate | 30.8           |
| 2                                                 | PS 1h 100C                                 | 39.8           | 2                                                     | PET                  | 29.81          |
| 3                                                 | PS, atactic                                | 34.42          | 3                                                     | PS, atactic          | 23.02          |
| 4                                                 | Acrylonitrile butadiene styrene terpolymer | 27.73          | 4                                                     | PS                   | 25.89          |
| 5                                                 | Poly(styrene:vinylidene chloride)          | 40.47          | 5                                                     | PET                  | 77.96          |

**Table S17: FTIR-ATR matches for Arkansas River 1 sample**

| Arkansas River 1, Sieving + Digestion + Flotation |                                   |                | Arkansas River 1, Elutriation + Digestion + Flotation |                                           |                |
|---------------------------------------------------|-----------------------------------|----------------|-------------------------------------------------------|-------------------------------------------|----------------|
| Point                                             | ID                                | Best Match (%) | Point                                                 | ID                                        | Best Match (%) |
| 1                                                 | PET 24h 200C                      | 30.94          | 1                                                     | PET 24h 200C                              | 41.01          |
| 2                                                 | Poly(ethylacrylate:st:acrylamide) | 34.38          | 2                                                     | Polyoxethylene isodecyl ether phosphate   | 54.07          |
| 3                                                 | LDPE 8h 200C                      | 72.64          | 3                                                     | Rayon 24h 200C                            | 62.93          |
| 4                                                 | Poly(ethylene:propylene)          | 51.44          | 4                                                     | PE 1h 300C                                | 54             |
| 5                                                 | Aged PE                           | 86.1           | 5                                                     | PS 1h 200C                                | 55.89          |
| 6                                                 | Poly(ethylene:propylene)          | 50.11          | 6                                                     | Rayon 8h 200C                             | 52.95          |
| 7                                                 | Poly(ethylene:propylene)          | 43.43          | 7                                                     | Reeroaluminum silicate                    | 47.93          |
| 8                                                 | PET 24h 200C                      | 37.66          | 8                                                     | LLDPE 8h 200C                             | 30.49          |
| 9                                                 | LDPE 24h 200C                     | 42.06          | 9                                                     | Hydrous aluminum silicate                 | 53.13          |
| 10                                                | LDPE 2h 200C                      | 64.56          | 10                                                    | Rayon                                     | 58.18          |
| 11                                                | Olefin                            | 45.94          | 11                                                    | PET                                       | 75.23          |
| 12                                                | Poly(ethylene:propylene:diene)    | 43.12          | 12                                                    | Poly(styrene:acrylonitril:MMA)            | 70.41          |
| 13                                                | Rayon 8h 200C                     | 31.18          | 13                                                    | LDPE 2h 200C                              | 75.01          |
| 14                                                | Rayon 24h 200C                    | 55.34          | 14                                                    | PET 2h 100C                               | 97.73          |
| 15                                                | PET                               | 64.09          | 15                                                    | Alumina silicate                          | 42.53          |
| 16                                                | PET 1h 100C                       | 94.43          | 16                                                    | PS 8h 100C                                | 33.77          |
| 17                                                | Basic lead carbonate              | 26.46          | 17                                                    | Rayon 1h 200C                             | 34.02          |
| 18                                                | HDPE 8h 100C                      | 93.25          | 18                                                    | Rayon 1h 300C                             | 37.5           |
| 19                                                | Alumina silicate                  | 39.55          | 19                                                    | Rayon                                     | 38.49          |
| 20                                                | Rayon                             | 25.12          | 20                                                    | Hydrous aluminum silicate                 | 44.31          |
| 21                                                | PS 1h 200C                        | 28.95          | 21                                                    | Poly(styrene:vinylidene chloride)         | 44.69          |
| 22                                                | 5-phenyltetrazole calcium salt    | 24.13          | 22                                                    | Zinc salt                                 | 57.43          |
| 23                                                | Polyester resin, unsaturated      | 28.01          | 23                                                    | Zinc salt                                 | 55.68          |
| 24                                                | Rayon                             | 41.03          | 24                                                    | Basic lead salt                           | 26.56          |
| 25                                                | PS, atactic                       | 32.45          | 25                                                    | Poly(vinyl butyral)                       | 32.71          |
| 26                                                | Poly(vinyltoluene:butadiene)      | 32.38          | 26                                                    | Rayon                                     | 41.56          |
| 27                                                | LDPE 1h 200C                      | 30.88          | 27                                                    | Aromatic hydrocarbon resin                | 56.6           |
| 28                                                | PE 8h 100C                        | 55.01          | 28                                                    | Acrylonitril butadiene styrene terpolymer | 23.21          |
| 29                                                | Olefin                            | 35.26          | 29                                                    | Poly(dimethylsiloxane)                    | 29.07          |
| 30                                                | Rayon 24h 200C                    | 60.64          | 30                                                    | SiO2, crystalline                         | 36.13          |



**Table S18:** FTIR-ATR matches for Boomer Creek sample

| Boomer Creek, Sieving + Digestion + Flotation |                                  |                | Boomer Creek, Elutriation + Digestion + Flotation |                                   |                |
|-----------------------------------------------|----------------------------------|----------------|---------------------------------------------------|-----------------------------------|----------------|
| Point                                         | ID                               | Best Match (%) | Point                                             | ID                                | Best Match (%) |
| 1                                             | PE, pristine                     | 98.2           | 1                                                 | Poly(styrene:vinylidene chloride) | 57.75          |
| 2                                             | PP 1h 200C                       | 81.7           | 2                                                 | Organo barium-zinc                | 27.89          |
| 3                                             | Rayon                            | 60.46          | 3                                                 | Basic lead carbonate              | 36.81          |
| 4                                             | LDPE 1h 300C                     | 64.86          | 4                                                 | Poly(styrene:vinylidene chloride) | 51.31          |
| 5                                             | PS 8h 300C                       | 28.59          | 5                                                 | PS 8h 100C                        | 40.9           |
| 6                                             | PE 1h 200C                       | 76.75          | 6                                                 | PVC                               | 37.46          |
| 7                                             | Basic lead carbonate             | 26.03          | 7                                                 | PET                               | 24.59          |
| 8                                             | Rayon 24h 200C                   | 48.56          | 8                                                 | Rayon                             | 34.4           |
| 9                                             | Rayon 24h 200C                   | 65.68          | 9                                                 | Nylon                             | 48.46          |
| 10                                            | LDPE 24h 300C                    | 75.28          | 10                                                | Rayon                             | 32.98          |
| 11                                            | Basic lead carbonate             | 38.56          | 11                                                | PET                               | 31.8           |
| 12                                            | Rayon                            | 55.02          | 12                                                | PE 24h 300C                       | 34.72          |
| 13                                            | Zinc salt                        | 26.96          | 13                                                | Poly(vinyltoluene:butadiene)      | 32.62          |
| 14                                            | Nylon                            | 34.64          | 14                                                | Rayon                             | 20.6           |
| 15                                            | Zinc salt                        | 44.62          | 15                                                | PS 1h 200C                        | 32.06          |
| 16                                            | Zinc salt                        | 41.89          | 16                                                | PET                               | 36.46          |
| 17                                            | Olefin                           | 69.53          | 17                                                | PS, atactic                       | 35.13          |
| 18                                            | LDPE 2h 200C                     | 71.91          | 18                                                | Poly(styrene:vinylidene chloride) | 41.91          |
| 19                                            | PE 1h 200C                       | 77.58          | 19                                                | PS, atactic                       | 40.75          |
| 20                                            | Olefin                           | 71.15          | 20                                                | PS 1h 100C                        | 43.3           |
| 21                                            | Acrylic                          | 24.29          | 21                                                | PS 8h 100C                        | 32.95          |
| 22                                            | LDPE 1h 200C                     | 81.05          | 22                                                | PE, oxidized                      | 22.05          |
| 23                                            | LDPE 2h 200C                     | 63.01          | 23                                                | Poly(vinylidene fluoride)         | 18.44          |
| 24                                            | Olefin                           | 33.14          | 24                                                | PS 8h 100C                        | 43.04          |
| 25                                            | Polystyrene:vinylidene chloride) | 23.71          | 25                                                | Poly(vinyltoluene:butadiene)      | 34.86          |
| 26                                            | Olefin                           | 33.89          | 26                                                | Basic lead carbonate              | 22.06          |
| 27                                            | Zinc sulfide/barium sulfate      | 31.2           | 27                                                | Decaromodiphenyl oxide)           | 16.53          |
| 28                                            | Poly(ethylene:propylene)         | 59.27          | 28                                                | Poly(styrene:vinylidene chloride) | 39.71          |
| 29                                            | Poly(ethylene:propylene)         | 54.38          | 29                                                | 5-phenyltetrazole calcium salt    | 17.28          |
| 30                                            | PS 1h 100C                       | 28.4           | 30                                                | PS 8h 100C                        | 45.96          |

**Table S19: FTIR-ATR matches for Applied Biosolids 1 sample**

| Applied Biosolids 1, Sieving + Digestion + Flotation |                                   |                | Applied Biosolids 1, Elutriation + Digestion + Flotation |                                   |                |
|------------------------------------------------------|-----------------------------------|----------------|----------------------------------------------------------|-----------------------------------|----------------|
| Point                                                | ID                                | Best Match (%) | Point                                                    | ID                                | Best Match (%) |
| 1                                                    | PS 24h 100C                       | 96.18          | 1                                                        | PS 8h 100C                        | 29.54          |
| 2                                                    | Acrylic                           | 59.31          | 2                                                        | Olefin                            | 48.43          |
| 3                                                    | Poly(styrene:acrylonitrile:MMA)   | 25.66          | 3                                                        | PET                               | 41.33          |
| 4                                                    | Poly(vinyletoluene:butadiene)     | 27.19          | 4                                                        | Basic lead carbonate              | 20.34          |
| 5                                                    | PS, atactic                       | 27.99          | 5                                                        | Basic lead carbonate              | 30.31          |
| 6                                                    | Alkyl resin                       | 31.38          | 6                                                        | PP 8h 200C                        | 16.47          |
| 7                                                    | Poly(styrene:acrylonitrile:MMA)   | 35.07          | 7                                                        | Poly(styrene:vinylidene chloride) | 47.07          |
| 8                                                    | PE, pristine                      | 88.21          | 8                                                        | Poly(methacrylate) w/OH groups    | 56.48          |
| 9                                                    | Styrene derived plasticizer       | 28.93          | 9                                                        | PP 1h 300C                        | 26.85          |
| 10                                                   | PE, aged                          | 84.81          | 10                                                       | PVC                               | 71.27          |
| 11                                                   | Dicapryl phthalate                | 63.62          | 11                                                       | PVC                               | 69.85          |
| 12                                                   | PE, aged                          | 69.7           | 12                                                       | PVC                               | 72.33          |
| 13                                                   | PS 24h 100C                       | 98.33          | 13                                                       | PVC                               | 72.27          |
| 14                                                   | Rayon 24h 200C                    | 73.53          | 14                                                       | PET 1h 100C                       | 93.88          |
| 15                                                   | Rayon 24h 200C                    | 68.61          | 15                                                       | Zinc salt                         | 47.36          |
| 16                                                   | Olefin                            | 67.08          | 16                                                       | Poly(ethylacrylate:st:acrylamide) | 69.84          |
| 17                                                   | EVOH                              | 33.77          | 17                                                       | PS, atactic                       | 29.26          |
| 18                                                   | ABS/Polycarbonate                 | 60.51          | 18                                                       | PET 1h 300C                       | 66.94          |
| 19                                                   | PFOS                              | 25.36          | 19                                                       | Zinc stearate                     | 78.26          |
| 20                                                   | Rayon 24h 200C                    | 68.84          | 20                                                       | Poly(ethylacrylate:st:acrylamide) | 56.73          |
| 21                                                   | PE, Aged                          | 86.94          | 21                                                       | PET 24h 100C                      | 19.65          |
| 22                                                   | ABS/Polycarbonate                 | 72.55          | 22                                                       | Poly(styrene:vinylidene chloride) | 32.31          |
| 23                                                   | Nylon                             | 68.53          | 23                                                       | Rayon                             | 50.45          |
| 24                                                   | Rayon 24h 200C                    | 39.46          | 24                                                       |                                   |                |
| 25                                                   | Rayon 24h 200C                    | 40.54          | 25                                                       | PVC                               | 38.95          |
| 26                                                   | Endothermic foaming agent         | 19.05          | 26                                                       | Poly(vinyl acetate:ethylene) 4:1  | 81.25          |
| 27                                                   | Poly(ethylacrylate:st:acrylamide) | 67.1           | 27                                                       | PE 1h 100C                        | 85.45          |
| 28                                                   | PET 24h 100C                      | 63.27          | 28                                                       | PS 1h 100C                        | 29.13          |
| 29                                                   | HDPE 24h 200C                     | 29.24          | 29                                                       | PE 1 300C                         | 39.67          |
| 30                                                   | PET                               | 34.16          | 30                                                       | PET 1h 100C                       | 82.22          |

**Table S20: FTIR-ATR matches for Applied Biosolids 2 sample**

| Applied Biosolids 2, Sieving + Digestion + Flotation |                                            |                | Applied Biosolids 2, Elutriation + Digestion + Flotation |                                   |                |
|------------------------------------------------------|--------------------------------------------|----------------|----------------------------------------------------------|-----------------------------------|----------------|
| Point                                                | ID                                         | Best Match (%) | Point                                                    | ID                                | Best Match (%) |
| 1                                                    | Epoxy resin                                | 81.64          | 1                                                        | LLDPE 1h 200C                     | 78.79          |
| 2                                                    | Poly(ethylene:propylene:diene)             | 69.07          | 2                                                        | Rayon                             | 33.32          |
| 3                                                    | PE 1h 100C                                 | 89.09          | 3                                                        | Rayon                             | 54.67          |
| 4                                                    | PET 1h 200C                                | 76.93          | 4                                                        | Rayon 24h 200C                    | 73.35          |
| 5                                                    | PET                                        | 55.51          | 5                                                        | Olefin                            | 73.21          |
| 6                                                    | Poly(styrene:acrylonitrile:MMA)            | 71.53          | 6                                                        | PS 24h 100C                       | 97.73          |
| 7                                                    | PS 1h 200C                                 | 35.37          | 7                                                        | PVC                               | 85.41          |
| 8                                                    | Rayon 24h 200C                             | 52.96          | 8                                                        | LDPE 8h 100C                      | 84.92          |
| 9                                                    | PE, pristine                               | 79.33          | 9                                                        | PE 1h 100C                        | 93.16          |
| 10                                                   | PET 1h 100C                                | 97.25          | 10                                                       | PE 24h 200C                       | 61.07          |
| 11                                                   | PVC                                        | 52.42          | 11                                                       | LDPE 8h 200C                      | 77.24          |
| 12                                                   | Poly(ethylacrylate:acrylamide)             | 54.62          | 12                                                       | Rayon 1h 300C                     | 39.28          |
| 13                                                   | 5-phenyltetrazole calcium salt             | 20.28          | 13                                                       | Alumina silicate                  | 59.7           |
| 14                                                   | Rayon                                      | 31.44          | 14                                                       | LDPE 8h 100C                      | 89.6           |
| 15                                                   | PET                                        | 30.29          | 15                                                       | ABS/PVC blend                     | 79.28          |
| 16                                                   | 5-phenyltetrazole calcium salt             | 21.96          | 16                                                       | PE, pristine                      | 96.06          |
| 17                                                   | Poly(styrene:4-vinylpyridine)              | 43.87          | 17                                                       | LDPE 8h 200C                      | 73.02          |
| 18                                                   | Poly(ethylacrylate:st:acrylamide)          | 43.68          | 18                                                       | Olefin                            | 82.35          |
| 19                                                   | Rayon 24h 200C                             | 64.18          | 19                                                       | PP 1h 200C                        | 86.92          |
| 20                                                   | Rayon 24h 200C                             | 41.3           | 20                                                       | Poly(vinyl acetate:ethylene) 4:1  | 90.89          |
| 21                                                   | Basic lead carbonate                       | 56.02          | 21                                                       | LLDPE 8h 100C                     | 83.92          |
| 22                                                   | Olefin                                     | 33.66          | 22                                                       | ABS/polycarbonate                 | 74.28          |
| 23                                                   | PS 1h 200C                                 | 43.91          | 23                                                       | Rayon 24h 200C                    | 67.74          |
| 24                                                   | PET 24h 100C                               | 21.45          | 24                                                       | Rayon 8h 200C                     | 50.8           |
| 25                                                   | PET                                        | 51.72          | 25                                                       | ABS/polycarbonate                 | 73.76          |
| 26                                                   | Poly(vinyltoluene:butadiene)               | 36.69          | 26                                                       | Poly(styrene:vinylidene chloride) | 25.13          |
| 27                                                   | Acrylonitrile butadiene styrene terpolymer | 22.69          | 27                                                       | PS, pristine                      | 20.94          |
| 28                                                   | Poly(styrene:vinylidene chloride)          | 43.03          | 28                                                       | PS 8h 100C                        | 35.08          |
| 29                                                   | PET                                        | 61.53          | 29                                                       | PET                               | 59             |
| 30                                                   | Poly(styrene:vinylidene chloride)          | 39.85          | 30                                                       | PS 8h 100C                        | 32.58          |

**Table S21:** Fluorescent images, Sieving

| Sample              | Trial 1                                                                             | Trial 2                                                                              | Trial 3                                                                               |
|---------------------|-------------------------------------------------------------------------------------|--------------------------------------------------------------------------------------|---------------------------------------------------------------------------------------|
| Control             | 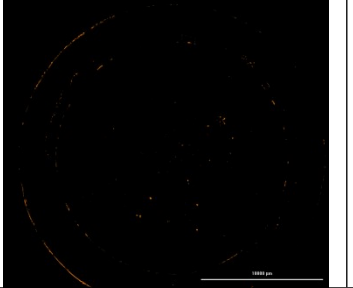   |    |    |
| Arkansas River 2    |    |    |    |
| Arkansas River 1    |   |   |   |
| Boomer Creek        |  |  |  |
| Applied Biosolids 1 |  |  |  |

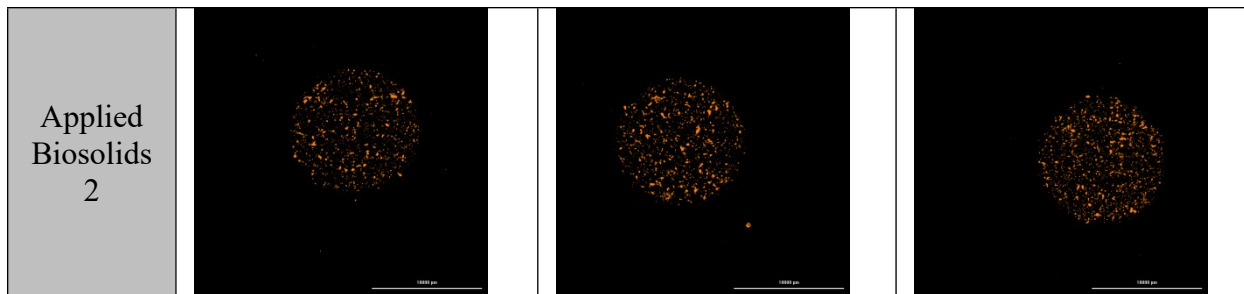

**Table S22:** Fluorescent images, Elutriation

| Sample           | Trial 1                                                                             | Trial 2                                                                              | Trial 3                                                                               |
|------------------|-------------------------------------------------------------------------------------|--------------------------------------------------------------------------------------|---------------------------------------------------------------------------------------|
| Control          |    |    |    |
| Arkansas River 2 |   |   |   |
| Arkansas River 1 |  |  |  |
| Boomer Creek     |  |  |  |

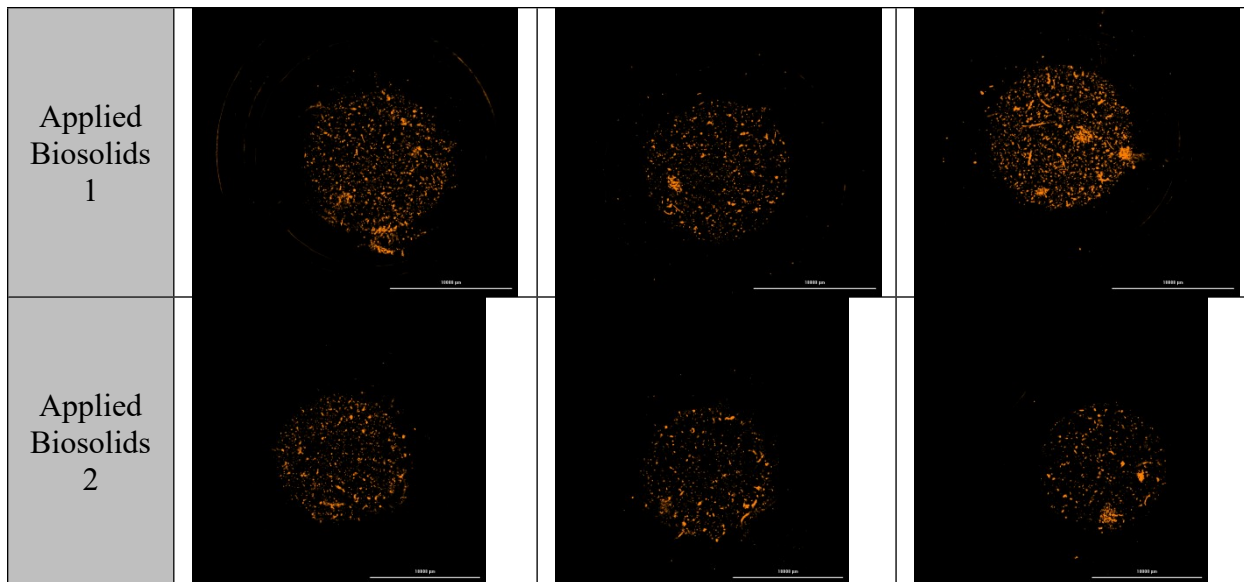

Supporting Figures

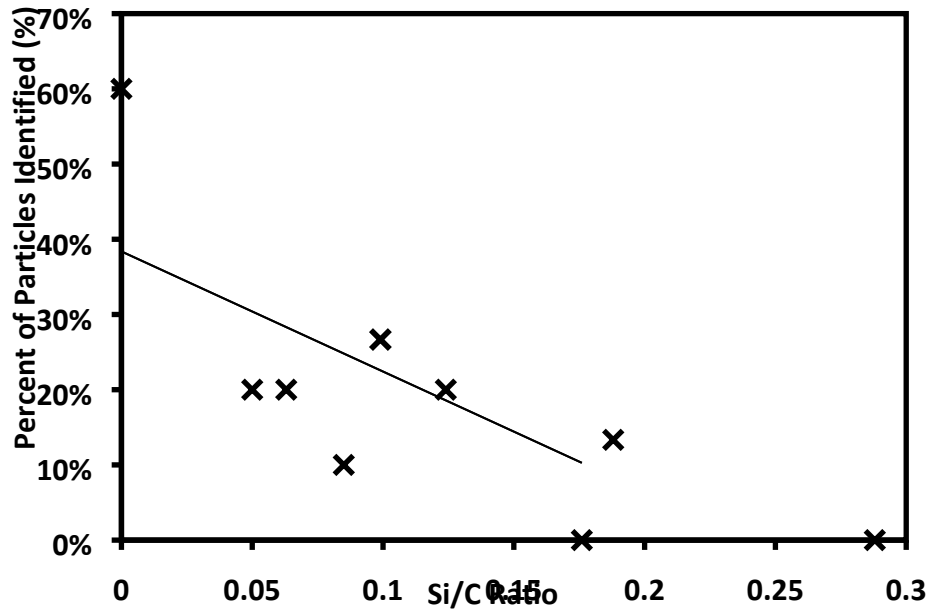

**Fig. S1:** Plot of percentage of identified particles (positive identifications of  $R^2 > 70\%$  divided by total particles tested) for all samples ( $n=10$ ).

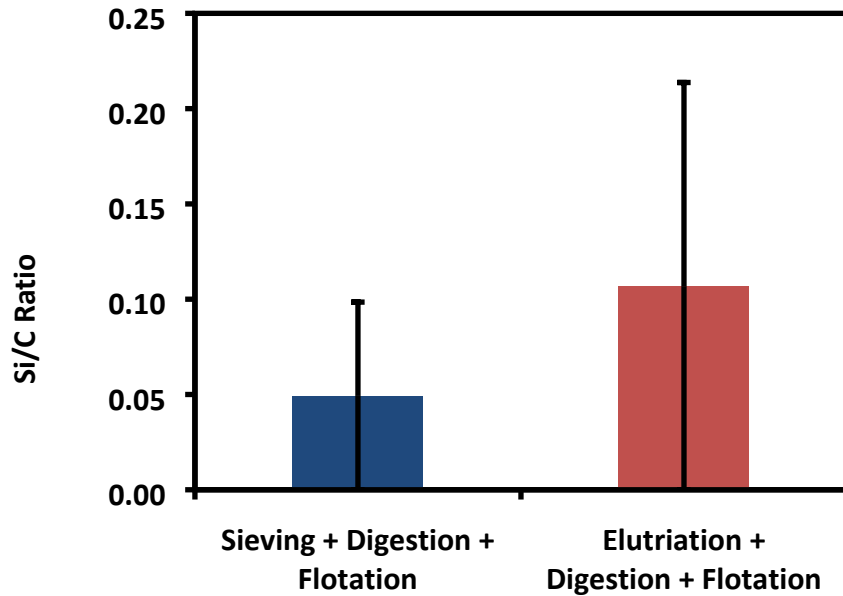

**Fig. S2:** Silicon to carbon ratio ( $\%Si / \%C$ ) averaged across all soil samples for each method. Error bars denote  $\pm 1$  standard deviation.
